1           **Evolutionary and phenotypic characterization of spike**  
2           **mutations in a new SARS-CoV-2 Lineage reveals two**  
3           **Variants of Interest**

4 Paula Ruiz-Rodriguez<sup>1#</sup>, Clara Francés-Gómez<sup>1#</sup>, Álvaro Chiner-Oms<sup>2</sup>, Mariana G. López<sup>2</sup>,  
5 Santiago Jiménez-Serrano<sup>2</sup>, Irving Cancino-Muñoz<sup>2</sup>, Paula Ruiz-Hueso<sup>3</sup>, Manuela Torres-Puente<sup>2</sup>,  
6 Maria Alma Bracho<sup>1,4</sup>, Giuseppe D’Auria<sup>1,3,4</sup>, Llúcia Martínez-Priego<sup>3</sup>, Manuel Guerreiro<sup>5,6</sup>, Marta  
7 Montero-Alonso<sup>7</sup>, María Dolores Gómez<sup>8</sup>, José Luis Piñana<sup>9</sup>, SeqCOVID-SPAIN consortium,  
8 Fernando González-Candelas<sup>1,4</sup>, Iñaki Comas<sup>2,4</sup>, Alberto Marina<sup>2,10</sup>, Ron Geller<sup>1\*</sup>, Mireia  
9 Coscolla<sup>1\*</sup>

10 1. <sup>1</sup>SysBio, University of Valencia-CSIC, FISABIO Joint Research Unit Infection and Public Health,  
11 Valencia, Spain.

12 2. Instituto de Biomedicina de Valencia (IBV-CSIC), Valencia, Spain.

13 3. Sequencing and Bioinformatics Service of FISABIO (Valencian Region Foundation for the  
14 Promotion of Health and Biomedical Research), Valencia, Spain.

15 4. CIBER in Epidemiology and Public Health, Spain.

16 5. Hematology Department, Hospital Universitari i Politècnic la Fe, Valencia, Spain

17 6. Instituto de Investigación Sanitaria La Fe (IIS-La Fe), Valencia, Spain.

18 7. Infectious Diseases Unit, Hospital Universitari i Politècnic la Fe, Valencia, Spain.

19 8. Microbiology Department, Hospital Universitari i Politècnic La Fe, Valencia, Spain

20 9. Hematology Service, Hospital Clínico Universitario, Institute for Research INCLIVA, Valencia,  
21 Spain.

22 10. CIBER in Rare Diseases (CIBERER), Spain.

23 #equal contributions

24 \*corresponding author

25 **Keywords:** SARS-CoV-2, Spike, HR2, variants, homoplasy, and antibody escape.

26 **Abstract**

27 Molecular epidemiology of SARS-CoV-2 aims to monitor the appearance of new variants with  
28 the potential to change the virulence or transmissibility of the virus. During the first year of  
29 SARS-CoV-2 evolution, numerous variants with possible public health impact have emerged. We  
30 have detected two mutations in the Spike protein at amino acid positions 1163 and 1167 that  
31 have appeared independently multiple times in different genetic backgrounds, indicating they  
32 may increase viral fitness. Interestingly, the majority of these sequences appear in transmission  
33 clusters, with the genotype encoding mutations at both positions increasing in frequency more  
34 than single-site mutants. This genetic outcome that we denote as Lineage B.1.177.637, belongs  
35 to clade 20E and includes 12 additional single nucleotide polymorphisms but no deletions with  
36 respect to the reference genome (first sequence in Wuhan). B.1.177.637 appeared after the first  
37 wave of the epidemic in Spain, and subsequently spread to eight additional countries, increasing  
38 in frequency among sequences in public databases. Positions 1163 and 1167 of the Spike protein  
39 are situated in the HR2 domain, which is implicated in the fusion of the host and viral  
40 membranes. To better understand the effect of these mutations on the virus, we examined  
41 whether B.1.177.637 altered infectivity, thermal stability, or antibody sensitivity. Unexpectedly,  
42 we observed reduced infectivity of this variant relative to the ancestral 20E variant *in vitro* while  
43 the levels of viral RNA in nasopharyngeal swabs did not vary significantly. In addition, we found  
44 the mutations do not impact thermal stability or antibody susceptibility in vaccinated individuals  
45 but display a moderate reduction in sensitivity to neutralization by convalescent sera from early

46 stages of the pandemic. Altogether, this lineage could be considered a Variant of Interest (VOI),  
47 we denote VOI1163.7. Finally, we detected a sub-cluster of sequences within VOI1163.7 that  
48 have acquired two additional changes previously associated with antibody escape and it could  
49 be identified as VOI1163.7.V2. Overall, we have detected the spread of a new Spike variant that  
50 may be advantageous to the virus and whose continuous transmission poses risks by the  
51 acquisition of additional mutations that could affect pre-existing immunity.

## 52 **Introduction**

53 Genomic surveillance of viral mutations is the first step in detecting viral changes that could  
54 impact public health by interfering with diagnostics, modifying pathogenicity, or altering  
55 susceptibility to existing immunity or treatments. In many countries, the challenge of detecting  
56 new mutations of interest in SARS-CoV-2 is approached by sequencing representative genomes  
57 from circulating viruses, sharing sequence information on public databases (e.g. GISAID<sup>1</sup>), and  
58 analysing them in real-time using platforms, such as Nextstrain<sup>2</sup>. While mutations appear  
59 randomly, their fate in the population depends on a combination of the conferred fitness  
60 advantage as well as stochastic and demographic processes. A first step in assessing the  
61 potential public health impact of mutations is to decipher if their increase in frequency is due to  
62 chance or adaptation. If found to be adaptive, it is important to evaluate whether their  
63 adaptation is linked to an improved ability to replicate, colonize, transmit, or evade antiviral  
64 hosts defences<sup>3</sup>. An important challenge in the field is to decipher which of all the variants that  
65 appear should be monitored to implement measures to mitigate their risk to public health.  
66 Genotypes that are phenotypically different from a reference isolate or have mutations that lead  
67 to changes associated with either established or suspected phenotypes could be considered  
68 Variants of Interest (VOI) if they also fit one of the following criteria: i) cause community  
69 transmission/multiple COVID-19 clusters or ii) have been detected in multiple countries<sup>4</sup>. Among  
70 VOI, only those genotypes that are associated with higher transmissibility, with detrimental

71 changes in COVID-19 epidemiology, with increased virulence, with changes to clinical  
72 presentation, or with decrease effectiveness of public health measures, diagnostics, vaccines or  
73 therapeutics are further categorized as variants of concern<sup>4</sup>.

74 Mutations in SARS-CoV-2 have been reported since the early stages of the epidemic<sup>5-7</sup>. While no  
75 signs of recombination have been detected so far among SARS-CoV-2 variants<sup>8</sup>, the most  
76 common mutations described are single nucleotide polymorphisms (SNPs) and small deletions<sup>9-</sup>  
77 <sup>11</sup>. Genomic surveillance of mutations has been mostly focused on the Spike (S) protein because  
78 of its key roles in viral entry and immunity<sup>12</sup>, as well as the fact that this protein constitutes the  
79 basis of numerous SARS-CoV-2 vaccines<sup>13</sup>. S is a homotrimeric protein, whose heavily  
80 glycosylated ectodomain protrudes from the viral membrane, showing a bat-like shape with a  
81 N-terminal globular head portion connected to the membrane by an elongated stalk<sup>14</sup>. The S  
82 protein is proteolytically processed by the cellular furin protease into the S1 and S2 subunits<sup>15,16</sup>.  
83 Additional proteolytic cleavage occurs following S protein binding to the host receptors,  
84 facilitating S1 subunit release. The C-terminal S2 subunit remains trimeric in the viral membrane  
85 but undergoes conformational changes that promote viral membrane fusion with the host cell<sup>17</sup>.  
86 A key role in these conformational changes is played by two heptad repeat motifs, HR1 and HR2  
87 that, starting from the head and stalk regions in the pre-fusion state of S protein, form a HR1-  
88 HR2 six-helix bundle in the post-fusion state that is critical for viral entry<sup>18</sup>.

89 The first mutation that was identified as of potential concern was an aspartic acid to a glycine  
90 mutation in the S1 subunit of the S protein at position 614 (D614G). D614G emerged early in the  
91 epidemic, became predominant in most countries within 2 months, and completely dominated  
92 the epidemic by August 2020<sup>19</sup>. As with any mutant, the initial spread of this mutation could  
93 have resulted from stochastic events, the dynamics of epidemic, or an intrinsically higher viral  
94 fitness. More than six months after the initial report of this mutation, several studies have found  
95 evidence in favour of higher transmission efficacy in animal models and human populations<sup>5,20-</sup>



96 <sup>22</sup>. This variant replicates better in some cell culture and animal models<sup>20,21,23</sup>, and is associated  
97 with higher viral loads in infected individuals<sup>19</sup>; importantly, however, it does not impact  
98 diagnostics or vaccine efficacy.

99 Following the first wave of the pandemic, additional variants have been reported from many  
100 countries. Among the first of these was the A222V mutation at the N-terminal domain (NTD) of  
101 the S1 subunit, which occurred in the background of the D614G S protein mutation. This variant,  
102 termed 20E, was first sequenced in Spain and expanded throughout Europe<sup>6</sup>. Other variants  
103 have been reported since, such as the so-called “cluster 5”, which harbours a combination of 3  
104 SNPs and single deletion related to mink farms in Denmark<sup>24</sup>. One of the SNPs is in the S protein  
105 of this variant, Y453F, occurs in the receptor binding domain (RBD) and may increase binding to  
106 cell receptors in mink<sup>25</sup>. Transmission of this variant between humans and minks has been  
107 reported<sup>7</sup>, highlighting a possible risk of expansion in the human population, which resulted in  
108 proposals for large scale culling of mink populations in Denmark. Studies to assess the biological  
109 impact of this mutant have not been reported but there is no evidence for its wide spread over  
110 the course of >6 months since its description<sup>26</sup>. By December 2020, three variants of concern  
111 (VOCs) were described, all of which share the N501Y amino acid replacement in the RBD of the  
112 S protein: 20I/501Y.V1 (also called Lineage B.1.1.7) was originally described in the UK<sup>11</sup>,  
113 20H/501Y.V2 (B.1.351) in South Africa, and 20J/501Y.V3 (P1) in Brazil. These variants are of  
114 particular concern because they are more transmissible<sup>27-29</sup> and, although data on antigenicity  
115 and disease severity is not conclusive, could result in reduced susceptibility to neutralization by  
116 existing immunity and affect vaccine efficacy<sup>30-33</sup>. Importantly, all of these variants have spread  
117 outside of the country where they were initially identified and are estimated to spread faster  
118 than other co-circulating genotypes<sup>27,34,35</sup>.

119 In this work, we have performed a detailed phylogenomic analysis of the appearance, spread  
120 and evolution of two mutations involving amino acid positions 1163 and 1167 of the HR2

121 functional motif of S protein. Our results provide evidence of repeated, independent  
122 emergence, suggesting these mutations contribute to increased viral fitness. In addition, we  
123 have evaluated the biological relevance of these mutations to viral infectivity, virion stability,  
124 and neutralization by sera from convalescent and vaccinated individuals.

## 125 **Results**

### 126 **Multiple and independent mutations in amino acid positions 1163 and 1167 of the Spike** 127 **protein.**

128 SARS-CoV-2 genetic variation has been monitored by the Spanish sequencing consortium  
129 SeqCOVID to follow the expansion of mutations that could potentially result in a change of the  
130 biological properties of the virus. We focused on mutations in the S protein because of its  
131 relevance for infection and immunity<sup>12</sup>. We detected two mutations in the *spike* gene: G25049T  
132 (D1163Y) and G25062T (G1167V), which appeared in Spain as early as March and April 2020,  
133 respectively (Supplementary Fig.1). These mutations continued arising independently of each  
134 other and, by the end of June, when the predominant circulating genotypes from the first wave  
135 in Spain had already been replaced by other variants<sup>36</sup>, were also observed together  
136 (Supplementary Fig.1). Both positions have mutated multiple times independently and to  
137 different amino acids at a lower frequency. On the one hand, D1163 appears mutated at least  
138 99 times (D1163Y: 84, D1163V: 4, D1163G: 3, D1163A: 2, D1163E: 2, D1163H: 2, D1163N: 1, and  
139 D1163H/Y: 1) in 47 lineages according to the PANGO scheme<sup>37</sup>. On the other hand, G1167  
140 appears mutated at least 54 times (G1167V: 39, G1167D: 4, G1167C: 3, G1167R: 3, G1167S: 3,  
141 G1167F: 1, and G1167A: 1) in 20 PANGO lineages including B.1 (Supplementary Fig.2e) and its  
142 derivatives B.26, B.40 (Supplementary Fig.2c), and D.2 (Supplementary Fig.2f).

### 143 **Clusters of transmission with amino acid changes in positions 1163 and 1167 of Spike**

144 Positions 1163 and 1167 in the S protein have mutated independently multiple times in SARS-  
145 CoV-2. The majority of mutated sequences (94.43%) were found in transmission clusters (see  
146 methods for definition of clusters; Figure 1a,b), with a small minority not belonging to a  
147 transmission cluster due to either incomplete sampling or failure to spread. While different  
148 amino acids changes have been detected at both positions, only one change at each position  
149 appeared in most clusters: D1163Y in 83.33% and G1167V in 69.23% clusters. D1163Y appeared  
150 in 22 transmission clusters (Figure 1a) and G1167V in 8 clusters (Figure 1b). Interestingly, the  
151 biggest cluster included both the D1163Y and G1167V mutations together. We denote this  
152 cluster as B.1.177.637, which was detected in 65 sequences from Spain until December 2020,  
153 representing 1.17% of the Spanish sequences. Globally, this cluster, which is within lineage 20E  
154 (also described as 20A.EU1<sup>6</sup>, and B.1.177<sup>37</sup>), includes 1,627 sequences (Figure 1c). B.1.177.637  
155 is characterized by nine nonsynonymous and six synonymous mutations with respect to the  
156 reference sequence from Wuhan (Supplementary table 2), but no deletions were shared among  
157 B.1.177.637 sequences. Amino acid changes were found in A222V, D614G, D1163Y, and G1167V  
158 in the S protein, A220V and P365S in the N protein, V30L in ORF10, L67F in ORF14, and P4715L  
159 in ORF1ab (Supplementary Fig.3 and Supplementary table 2). Synonymous mutations were also  
160 observed in the *orf1ab*, *n* and *m* genes (Supplementary Fig.3 and Supplementary table 2). All  
161 evidence support we consider this cluster a new Lineage, and we requested to be under the  
162 name B.1.177.637 (<https://github.com/cov-lineages/pango-designation/issues/22>).

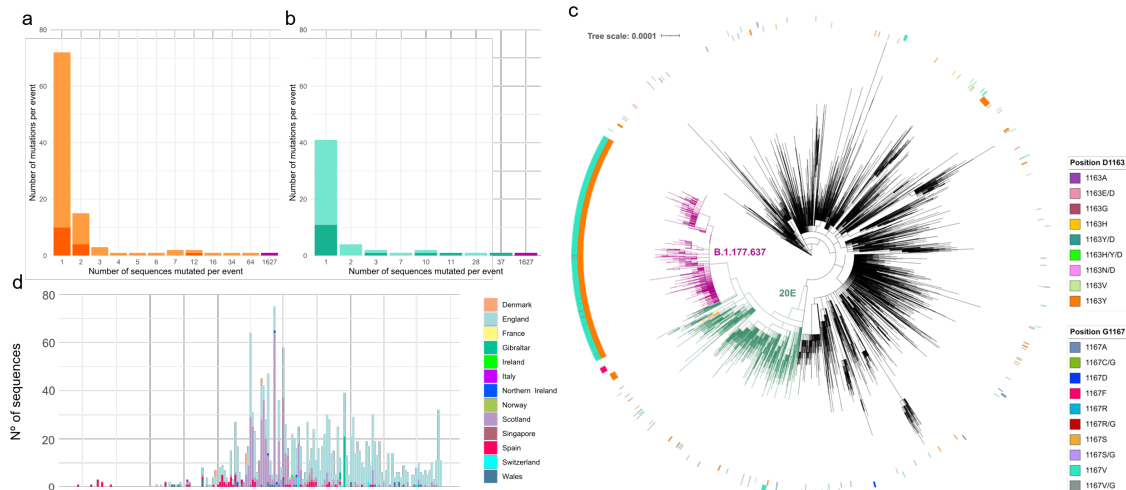

163

164 **Figure 1. Sequences mutated at positions 1163 and 1167 of the S protein.** a. The number of  
 165 mutation events for amino acid replacement D1163Y (light orange) or another D1163 amino acid  
 166 replacements (dark orange). b. The number of mutation events for amino acid replacement  
 167 G1167V (light turquoise) or another G1167 amino acid replacements (dark turquoise). Bars  
 168 coloured in magenta indicate the appearance of both the D1163Y and G1167V amino acid  
 169 replacements in the same sequences. c. Maximum-likelihood phylogeny of 10,450 SARS-CoV-2  
 170 genomes. The inner circle of the rings represents sequences with amino acid changes in position  
 171 D1163 of the S protein. The external circle represents sequences with amino acid changes in  
 172 position G1167 of the S protein. Branches are coloured in magenta for B.1.177.637, green for  
 173 clade 20E, and orange for cluster 1163.654. The scale bar indicates the number of nucleotide  
 174 substitutions per site. d. Temporal distribution and frequency of sequences with variant  
 175 B.1.177.637 coloured by geographical origin.

176 Within 20E, the second largest cluster including any of these mutations was observed in 34  
 177 sequences with E654Q and D1163Y in S protein plus 7 nonsynonymous and 6 synonymous  
 178 mutations (Supplementary table 2 and Supplementary Fig.3). We denote this second cluster,  
 179 which is also embedded within lineage 20E, cluster 1163.654 (Figures 1c and S3). Cluster  
 180 1163.654 appeared first in Ireland on 2020-07-23 and subsequently appeared in Spain and

181 England. However, after three months, cluster 1163.654 is no longer being detected. A large  
182 cluster within Lineage 20E is formed by 37 sequences with the mutation G1167F. Sequences for  
183 this cluster were obtained in Wales between the end of October and the beginning of November  
184 2020 (dark pink in the external circle in Supplementary Fig.2g).

185

186 We found additional clusters involving mutations in position 1163 of the S protein; the largest  
187 cluster is composed of 64 sequences within Lineage B.1. The majority of which are from  
188 Denmark but also includes sequences from England and Sweden (orange in external ring in  
189 Supplementary Fig.2e). Among other smaller clusters, a cluster of 10 sequences with G1167V  
190 (within Lineage B.1) appeared in Spain in March (indicated in cyan within the external circle of  
191 Supplementary Fig.2e). The cluster was detected in two regions in Spain (Valencia, and Galicia),  
192 but was controlled with lockdown measures imposed in Spain from March to May and was not  
193 detected after May 2020. The same mutation was found in a cluster of 28 sequences within 20E  
194 from England and Wales between October and November 2020 (indicated in cyan within the  
195 external circle of Supplementary Fig.2g). Similarly, another cluster of 11 sequences in Lineage  
196 B.1.1 and with the mutation G1167A was detected in early January 2021, encompassing  
197 sequences from Ecuador, Colombia, and Peru (Supplementary Fig.2f). Within Lineage B.53, we  
198 found a cluster of 12 sequences from Lithuania with mutation D1163Y. Finally, we found small  
199 clusters with mutations in 1163 or 1167 within Lineage B.40 and Lineage A (Supplementary  
200 Fig.2b, c).

201 Because of the risk posed by VOC<sup>11,26,35</sup>, we examined whether mutations in 1163 and 1167 of  
202 the S protein were observed in the three VOC described to date. Indeed, mutations in these two  
203 positions were observed in two VOC, 20I/501Y.V1 and 20H/501Y.V2. Mutations involving amino  
204 acid positions 1163 and 1167 appeared independently in the background of 20I/501Y.V1  
205 multiple times. Specifically, mutations in D1163 have occurred at least 13 times in 24 sequences,

206 including four transmission clusters and nine unique sequences (Supplementary Fig.4), while  
207 mutations at G1167 were observed in at least five independent sequences. Interestingly,  
208 D1163Y and G1167V were observed together in only one individual within 20I/501Y.V1,  
209 although they were not fixed (relative frequency of 27% and 17% of the reads with D1163Y and  
210 G1167V, respectively; Supplementary table 3). Finally, only two sequences that harbour the  
211 amino acid replacement G1167V in the S protein were observed in the genomic background  
212 20H/501Y.V2 (Supplementary table 3).

### 213 **Evolution of B.1.177.637**

214 We explored the emergence and evolution of B.1.177.637, the largest and most successful  
215 cluster involving amino acid changes in positions 1163 and 1167 of the S protein. Lineage  
216 B.1.177.637 appeared in Spain in June 2020 in sequences from the Basque Country (Figure 1d,  
217 and Supplementary Video 1) and subsequently appeared in individuals from other countries,  
218 comprising a total of 1,627 sequences in GISAID (0.60% of 270,869 analysed sequences by 23<sup>rd</sup>  
219 of December 2020) (Figure 1d and Supplementary Video 1). The majority of the B.1.177.637  
220 sequences were obtained from the United Kingdom, including England (1,058), Scotland (419),  
221 Wales (34) and Northern Ireland (5), but were also observed in Gibraltar (24 sequences),  
222 indicating successful migration and transmission (Supplementary Video 1). Although  
223 B.1.177.637 is not well represented in sequences from other countries, it has been found in  
224 multiple sequences from Denmark (9), Switzerland (8), Norway (2), and single sequences from  
225 Italy, France, Singapore, and Ireland. By the end of 2020, B.1.177.637 was still circulating in  
226 Europe (Figure 1d and Supplementary Video 1), and by the end of February 2021 it was  
227 represented by 1,923 sequences in GISAID (0.33% of submitted sequences).

228 Within B.1.177.637, we detected additional SNPs in individual sequences or small groups of  
229 sequences. One of these changes is E484K in the RDB of the S protein, a mutation present in  
230 three VOCs (20I/501Y.V1, 20H/501Y.V2 and 20J/501Y.V3) that is implicated in increased ACE2

231 binding<sup>38</sup> and reduced neutralization by antibodies<sup>39</sup>. In addition, we found another change  
232 associated with evasion of antibody immunity: a deletion of positions 141-144 in the S protein,  
233 which partially overlaps with a smaller deletion at 144 reported in VOC 20I/501Y.V1<sup>40</sup>. This sub-  
234 cluster included five sequences along January 2021 from England and Wales (Supplementary  
235 table 2). The five sequences formed a monophyletic group embedded in B.1.177.637  
236 (Supplementary Fig.5), identified as cluster B.1.177.637.V2, which displays other  
237 nonsynonymous and synonymous mutations (Supplementary table 2) and only two sites are  
238 polymorphic within B.1.177.637.V2.

### 239 **Positions 1163 and 1167 of the S protein are located in the heptad repeat 2 motif**

240 The S protein mediates both the binding to cellular receptors and entry into the host cells<sup>12</sup>. For  
241 the former, the RBD motif in the S1 subunit interacts with the cellular receptor in the pre-fusion  
242 state. In the post-fusion state, two heptads repeat sequences (HR1 and HR2) in the S2 subunit  
243 must form a six-helix bundle in order to bring the viral and cellular membrane into close  
244 proximity<sup>41,42</sup> (Figure 2). S protein positions 1163 and 1167 are both located within the HR2  
245 domain. Specifically, 1167 is present at the beginning of the HR2 motif and 1163 in its upstream  
246 linker region (Figure 2a). Interestingly, this motif is highly invariable, showing 100% conservation  
247 across 14 related sarbecoviruses to which SARS-CoV-2 belongs to (Supplementary table 1)<sup>43,44</sup>.  
248 Structural characterization of full-length ectodomain of S protein has shown that the stalk  
249 portion encompassing positions 1163 and 1167 presents intrinsic flexibility in the pre-fusion  
250 state<sup>18</sup>, precluding its atomic visualization. This has been recently confirmed by high-resolution  
251 cryo-electron tomographic reconstitution of SARS-CoV-2<sup>14</sup>, where this region was observed to  
252 constitute a flexible hinge that acts as a “knee”, connecting two helical coiled-coil regions of the  
253 stalk (upper and lower legs; Figure 2b). Within this structure, the conformational freedom  
254 provided by the glycine residue at position 1163 should play a key role in the flexibility of the  
255 knee. In contrast, in the post-fusion state, this region shows high rigidity due to a strong

256 structural rearrangement of the HR2 motif, which adopts an extended conformation and tightly  
257 packs along the central 3-helix bundle stem formed by the HR1 motif (Figure 2c). The resulting  
258 HR1-HR2 bundle plays a key role in the mechanism of viral-host membrane fusion<sup>18,45</sup> and  
259 mutations in this region could have significant impact on the function of the S protein. In  
260 addition, the HR2 region is highly glycosylated, which is observed to be regularly spaced in both  
261 the pre- and post-fusion states and to mostly align to the side of the helix bundle<sup>14,18,45</sup>. Of note,  
262 two of these branched sugars are placed at positions N1158 and N1173, hiding positions 1163  
263 and 1167 (Figure 2b). Therefore, changes in stalk flexibility might have relevance in immunity by  
264 influencing both the intrinsic degree of exposure of this region and its sugar shielding.

265 Using the available structural information of the S protein in the pre- and post-fusion  
266 conformations<sup>18</sup>, we examined the possible implications of these mutations to viral infectivity.  
267 Based on these structures, G1167V mutation is predicted to confer significant rigidity to the  
268 structure in two ways. First, the introduction of a side chain strongly reduces the conformational  
269 freedom provided by the glycine residue. Second, the presence of the new aliphatic side chain  
270 provided by the valine residue strongly increases hydrophobicity, likely promoting the burial of  
271 this side chain in the HR1 helix 3-bundle stem in the post-fusion state or favouring its integration  
272 in the neighbour helical coiled-coil in the pre-fusion state (Figure 2b,c). Unlike position 1163,  
273 position 1167 is fully exposed to the solvent in both the pre- and post-fusion states (Figure 2b,c).  
274 Hence, the effect of D1163Y is likely to stem a change in nature of the side chain, switching from  
275 a charged aspartic acid residue at physiological pH to a polar group with hydrophobic properties  
276 in the tyrosine.



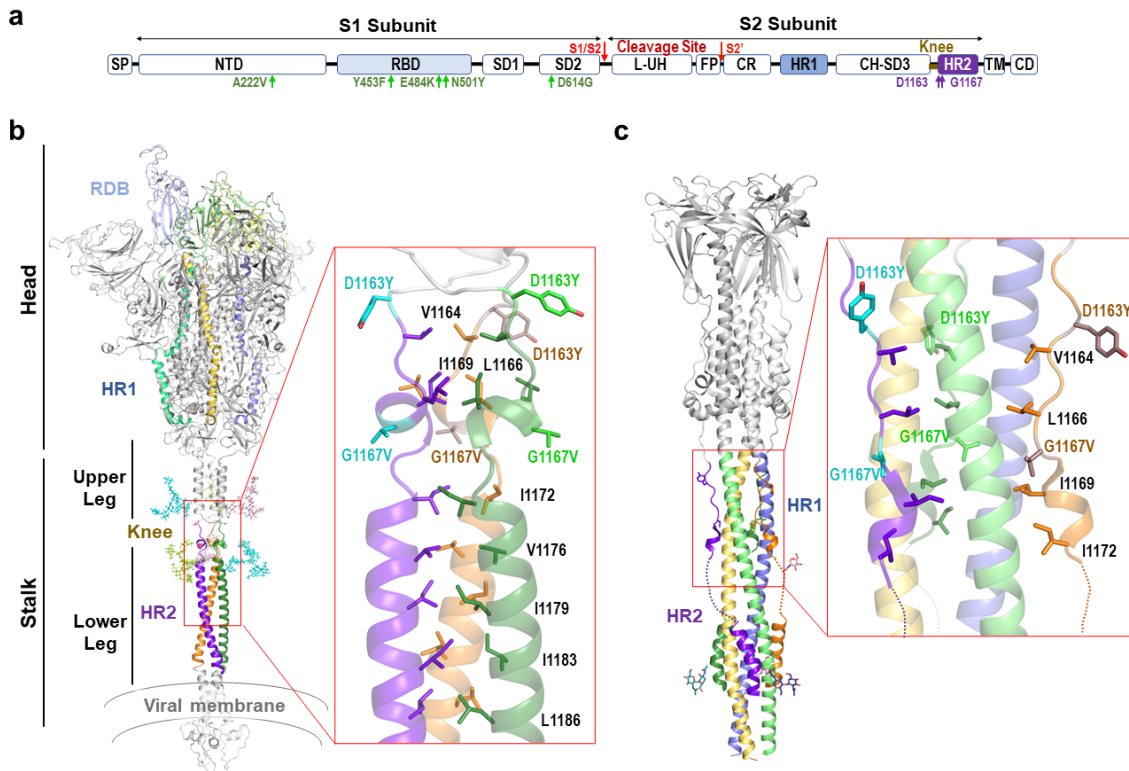

277

278 **Figure 2. The structure of 1163 and 1167 in the pre and post-fusion states of S protein. a.**

279 Schematic representation of the S protein. SP, Signal peptide; NTD, N-terminal domain; RBD,  
 280 receptor-binding domain; SD1-2, subdomains 1 and 2; L-UH, Linker-Upstream helix; FP, fusion  
 281 peptide; CR, connecting region; HR1, heptad repeat 1; CH-SD3, central helix subdomain 3; BH,  
 282  $\beta$ -hairpin; HR2, heptad repeat 2; TM, transmembrane; CD, cytoplasmic domain. Mutations  
 283 D1163Y and G1167V are indicated in purple and other mutations described in the text in green.

284 **b.** Cartoon representation (*left*) of a structural model of pre-fusion membrane-bound trimeric S  
 285 protein<sup>46</sup>. In each subunit the RBD, HR1 and HR2 domains are coloured in different tones (light  
 286 to dark) of blue, yellow, and green. The N-glycosylation of N1155 and N1176 are shown in stick  
 287 representation and coloured as the corresponding subunit. Functional and structural regions are  
 288 marked. A close-view (*right*) of the N-terminal portion of HR2 where D1163Y and G1167V  
 289 mutations are found. The side-chains of mutated and hydrophobic residues in the HR2 region  
 290 are shown in stick representation and coloured as corresponding subunit (mutated residues in  
 291 lighter tone). **c.** Cartoon representation (*left*) of S2 subunit in post-fusion conformation with HR1

292 and HR2 regions coloured as in b and N-glycosylation around mutation position shown as sticks.  
293 A close-view of the region encompassing the mutations (right), showing in stick representation  
294 the mutated and hydrophobic residues from the HR2 region shown in panel b. Dotted lines  
295 highlight HR2 disordered regions in the Cryo-EM structure.

### 296 **Spike aminoacid changes D1163Y and G1167V do not increase viral infectivity**

297 Previous reports have indicated that mutations in the S protein can increase infectivity<sup>5,21,47-49</sup>.  
298 Because the highest transmission success for mutations in S positions 1163 and 1167  
299 corresponds to the double mutant D1163Y and G1167V (characteristic of B.1.177.637), we  
300 explored whether these mutations in combination have an influence on infectivity. For this, we  
301 pseudotyped vesicular stomatitis virus lacking its glycoprotein and encoding GFP<sup>50</sup> (VSVΔG-GFP)  
302 with different S genotypes: Wuhan (D614), D614G, 20E (A222V and D614G), or B.1.177.637  
303 (A222V, D614G, D1163Y and G1167V). Infectious virus production was then assessed by limiting  
304 dilution and counting of GFP-positive cells in both Vero cells and A549 human alveolar basal  
305 epithelial cells expressing human ACE2 and TMPRSS2 (A549-hACE2-TMPRSS2). As previously  
306 reported<sup>19,21,51</sup>, the 20E S genotype enhanced infectivity relative to the Wuhan S genotype by  
307 70% in both Vero (p-value = 0.005 by unpaired t-test; Figure 3a) and A549-hACE2-TMPRSS2 cells  
308 (p-value = 0.016 by unpaired t-test; Figure 3b). The 20E S genotype also showed a trend towards  
309 increased infectivity versus the D614G mutation alone (35% increase in both cell lines), as has  
310 been previously reported<sup>49</sup>, yet the difference was not statistically significant (p-value > 0.05 by  
311 unpaired t-test; Figure 3a,b). In contrast, B.1.177.637 S genotype significantly diminished virus  
312 infectivity versus the 20E genotype, reducing virus titers by 20% in Vero cells (p-value = 0.009 by  
313 unpaired t-test; Figure 3a) and 29% in A549-hACE2-TMPRSS2 (p-value = 0.03 by unpaired t-test;  
314 Figure 3b). This is in agreement with a potential stabilization of the HR2 helix (Figure 2), which  
315 should limit the ability of the S protein to sample different structural conformations that could

316 be required for binding host-cell receptors. Hence, B.1.177.637 S genotype does not increase  
317 infectivity *in vitro*.

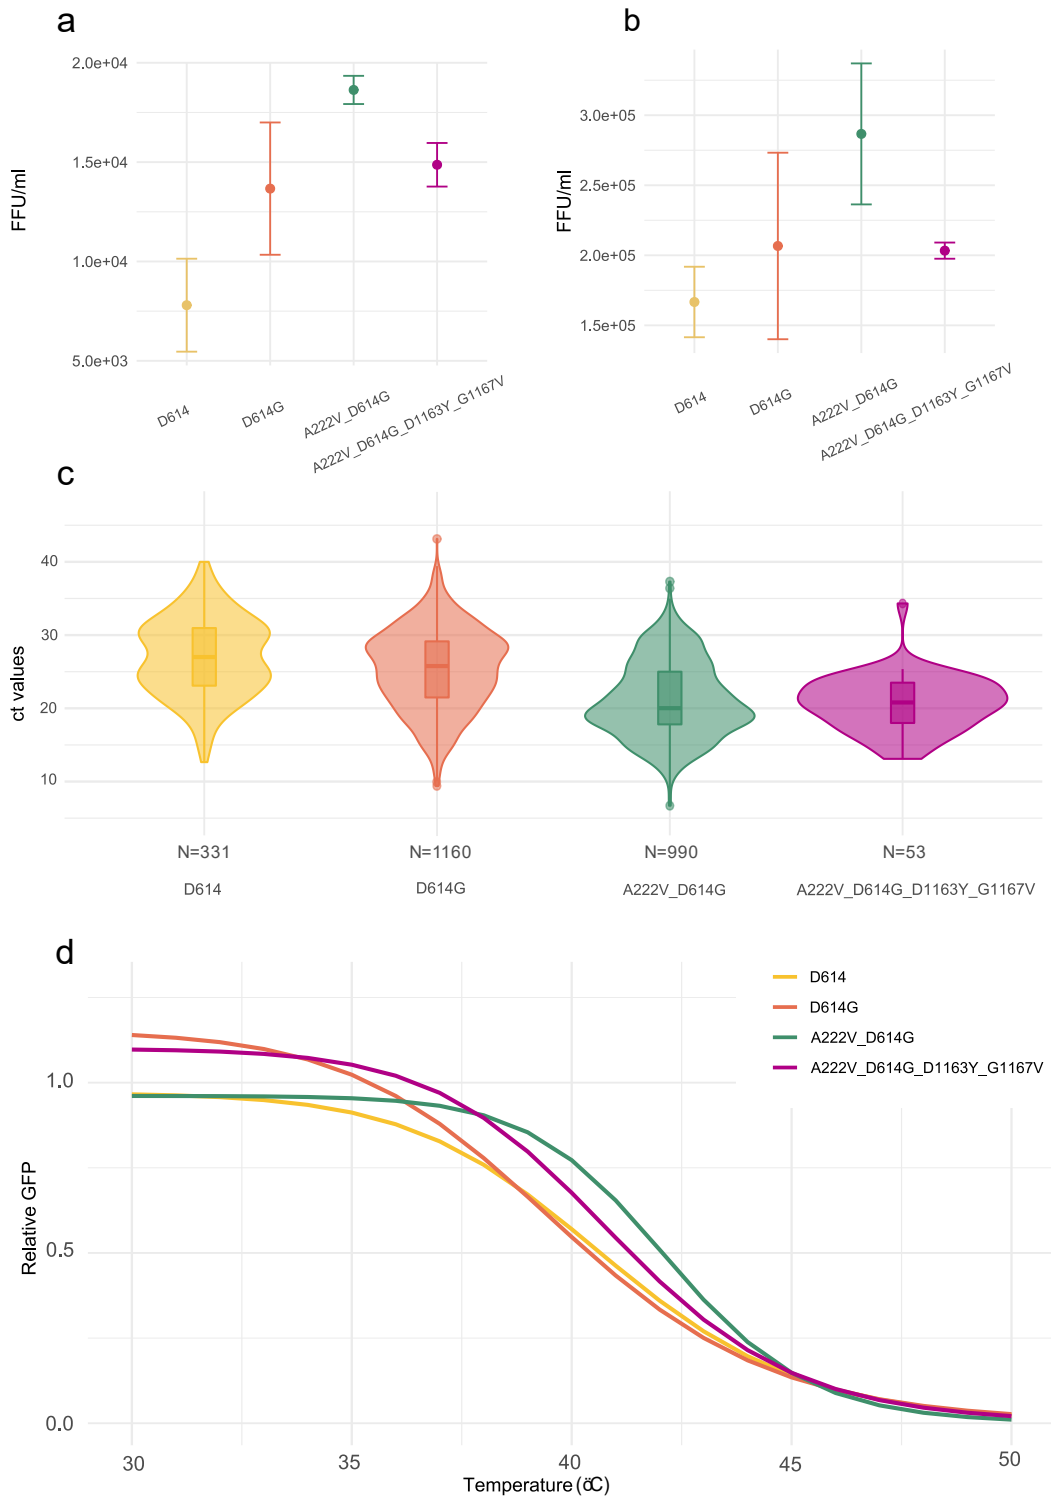

318

319 **Figure 3. Comparison of the infectivity and stability of different S genotypes. a, b.** The  
320 infectivity of VSV particles pseudotyped with each S protein genotype in either Vero (a) or  
321 human A549 cells expressing ACE2 and TMPRSS2 (b). The mean and standard deviation of three  
322 replicates is plotted. c. Comparison of cycle threshold (Ct) values for the *n* gene from patients  
323 infected with viruses encoding different S protein variants. Data is derived from 2,534 sequences  
324 from SeqCOVID consortium. The number of observations (N) analysed for each genotype is  
325 indicated. d. The thermal sensitivity of VSV pseudotyped with different S genotypes following  
326 incubation at 15 minutes. Data are standardized to the surviving fraction following incubation  
327 at 30°C, and the three-parameter log-logistic equation is plotted. FFU: focus forming units.

328 To examine whether reduced infectivity could also be observed *in vivo*, we tested if individuals  
329 infected with B.1.177.637 have different viral loads. For this, we used the cycle threshold (Ct) of  
330 real-time PCR used for diagnosis as a surrogate. As previously reported<sup>19</sup>, we detected higher Ct  
331 values for D614 wild-type variant (Ct mean = 27.00) compared to genotypes encoding the D614G  
332 S protein mutation (Ct mean = 25.32; p-value < 0.01 by unpaired Wilcoxon test, Figure 3c).  
333 However, we did not find significant differences in viral loads between individuals infected with  
334 B.1.177.637 genotype and other genotypes within 20E (Ct mean = 21.14 vs Ct mean = 20.63, p-  
335 value = 0.72 by unpaired Wilcoxon test, Figure 3c). Interestingly, higher viral loads were  
336 observed in individuals infected with B.1.177.637 and others 20E (D614G and A222V) compared  
337 to the D614G alone (D614G Ct mean = 25.32, 20E Ct mean = 21.14, B.1.177.637 Ct mean = 20.63,  
338 p-value < 0.01 for both comparisons by unpaired Wilcoxon test, Figure 3c). This data suggests  
339 that, unlike the results of the *in vitro* studies, B.1.177.637 replicates as efficiently as other 20E  
340 genotypes *in vivo*, although mutations outside of the S protein could contribute to this result.

#### 341 **Amino acid changes D1163Y and G1167V do not alter S protein stability**

342 As increased S protein stability could impact transmissibility by maintaining virion infectivity  
343 during the intra-host transmission period, we assessed the temperature sensitivity of the

344 different S variants. For this, we subjected VSV particles pseudotyped with different S genotypes  
345 to a range of temperatures for 15 minutes, after which we evaluated the surviving fraction.  
346 Overall, no major differences in the degree to which the different S proteins lost infectivity upon  
347 heat exposure were observed, with all S proteins showing a 50% reduction in infectivity at a  
348 similar temperature range (39.8-42.2°C; p-value > 0.05 for all except Wuhan S genotype (D614)  
349 versus 20E S genotype (A222V and D614G), where p-value = 0.01; Figure 3d). Hence, the D1163Y  
350 and G1167V mutations do not seem to have a major impact in the thermal stability of the S  
351 protein.

352 **Spike D1163Y and G1167V modestly reduce sensitivity to neutralization by existing antibody**  
353 **immunity**

354 Positions 1163 and 1167 of the S protein have been reported to occur in both T and B cell SARS-  
355 CoV-2 epitopes<sup>52-54</sup>. Moreover, numerous studies have shown that mutations in the S protein  
356 can affect antibody neutralization<sup>30,31</sup>. We therefore examined if the presence of D1163Y and  
357 G1167V alters the neutralization capacity of convalescent sera using VSV pseudotyped with  
358 either the 20E or B.1.177.637 S genotypes. In order to capture the potential influence of  
359 different infecting variants on antibody neutralization, we tested the sensitivity of these  
360 pseudotyped viruses to neutralization by sera from early (April 2020; First wave in Spain) or later  
361 (October 2020; Second wave in Spain) in the pandemic, when newer variants were dominant<sup>6,36</sup>.  
362 Overall, B.1.177.637 genotype conferred a modest but statistically significant reduction in  
363 sensitivity to neutralization by six serum samples tested from the early stage of the pandemic,  
364 as measured by the titers required to inhibit viral entry by 80% (ID<sub>80</sub>; mean = 6.75, range: 1.30-  
365 17.68; p-value = 0.008 by paired t-test; Figure 4a). A statistically significant but smaller effect  
366 was observed when the titers required to inhibit viral entry by 50% were examined (ID<sub>50</sub>; mean  
367 = 2.27, range: 1.61-3.54; p-value < 0.001 by paired t-test; Supplementary Fig.6). In contrast, both  
368 20E and B.1.177.637 were equally susceptible to sera from patients infected during the second

369 wave ( $ID_{80}$ ; mean = 1.03, range: 0.87-1.23; p-value = 0.83 by paired t-test; Figure 4b). These  
370 results indicate that the D1163Y and G1167V mutations can provide some degree of escape from  
371 pre-existing antibody-based immunity relative to the 20E S genotype depending on the genomic  
372 background of the infecting genotype. As a modest reduction in titers was observed with sera  
373 from early in the pandemic (Figure 4a), which is more closely related to the current S genotype  
374 present in approved vaccines<sup>55,56</sup>, we examined if B.1.177.637 S genotype resulted in reduced  
375 neutralization by sera from donors vaccinated with the BNT162b2 vaccine. No significant  
376 differences in susceptibility to antibody neutralization from vaccinated donors were observed  
377 between the two genotypes, indicating that VOI1163.7 is unlikely to alter the efficacy of vaccines  
378 based on the Wuhan S genotype (Figure 4c).

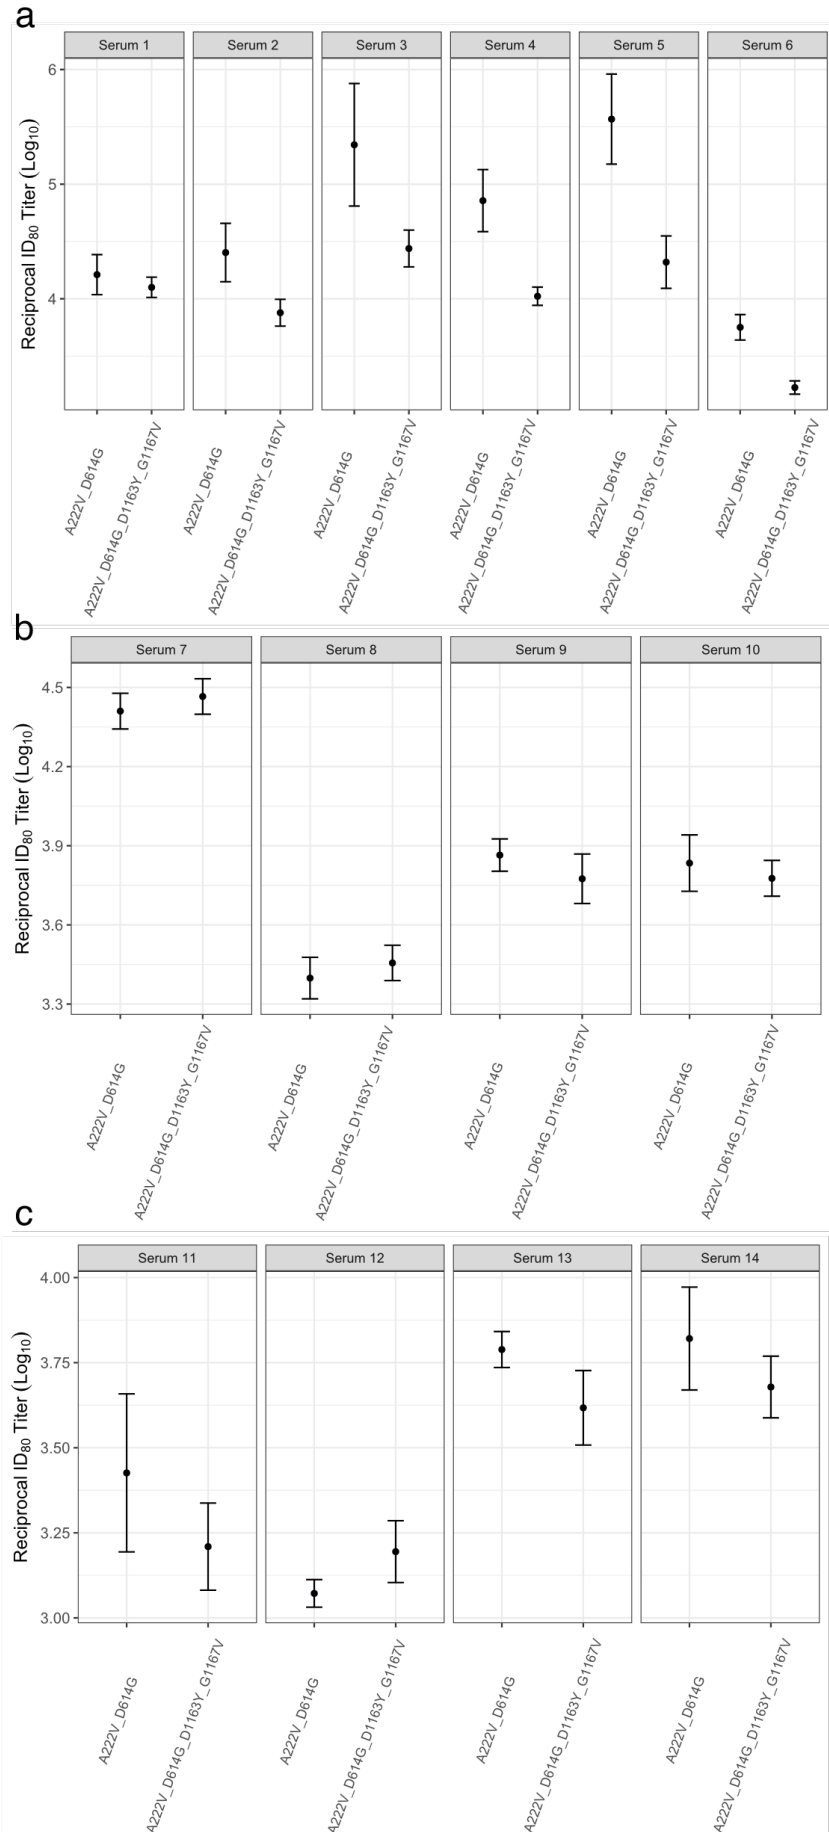

380 **Figure 5. Antibody neutralization of 20E and B.1.177.637 variants.** The reciprocal titer at which  
381 infection with the 20E S genotype (A222V and D614G) or B.1.177.637 S genotype (20E plus  
382 D1163Y and G1167V) is reduced by 80% ( $ID_{80}$ ) by sera from individuals infected during the early  
383 stage of the pandemic in (a) or during a later stage of the pandemic (b) or from donors  
384 vaccinated with the BNT162b2 vaccine (c). The mean and standard error of three replicates is  
385 plotted.

## 386 Discussion

387 SARS-CoV-2 success is linked to its ability to infect and be transmitted. Mutations that emerge  
388 independently several times and increase in frequency are likely to confer enhanced viral  
389 infectivity, transmission, or immune evasion. The identification of such mutants is of great  
390 importance, as they can significantly impact public health. In this work, we have identified two  
391 mutations in the S protein that are likely to be beneficial for the virus based on several lines of  
392 evidence. First, these mutations are highly variable within SARS-CoV-2 but conserved across the  
393 closely related coronaviruses. Second, the vast majority of sequences harbouring these  
394 mutations appear in clusters (Figure 1a and 1b). Third, the largest cluster, and therefore the  
395 most successful in terms of transmission, includes both mutations together (Figure 1a and 1b).  
396 Additionally, both positions have been reported as positively selected multiple times throughout  
397 the SARS-CoV-2 phylogeny indicating a fitness advantage<sup>57</sup>. Although either mutation in  
398 isolation could be advantageous, their co-occurrence in a large cluster that has been sustained  
399 for more than six months across Europe is suggestive of increased fitness when both mutations  
400 are present together.

401 Positions 1163 and 1167 are found in the HR2 domain of the S protein, adjacent to the  
402 transmembrane domain. Examination of available structural data suggests that G1167V might  
403 alter the flexibility of the S protein stalk by both restricting the conformational freedom normally  
404 conferred by the glycine residue and by introducing a hydrophobic side chain that will favour



405 burial in the HR2 coiled-coil leucine zipper of the pre-fusion state (Figure 2). This extensive  
406 flexibility of S prefusion stalk seems to be unique to the SARS-CoV-2 S protein and has not been  
407 reported for other class I fusion proteins<sup>18</sup>. The stalk flexibility has been suggested to increase  
408 avidity for the host receptors by allowing the engagement of multiple S proteins<sup>18</sup>. Therefore,  
409 stalk stabilization is likely to result in a reduced ability of S to bind receptors in the target cell.  
410 Indeed, we find the B.1.177.637 genotype to have reduced infectivity compared to the 20E  
411 genotype in both Vero and A549-hACE2-TMPRSS2 cells (Figure 3a, b). In contrast, viral load in  
412 individuals infected with different S genotypes indicated that 20E and B.1.177.637 reach similar  
413 degrees of viral replication *in vivo* (Figure 3c). This apparent discrepancy in the effect of the two  
414 mutations on infectivity may stem from the differences of SARS-CoV-2 infection *in vivo* and in  
415 the *in vitro* assay. A recent publication has suggested that the tyrosine-protein kinase receptor  
416 UFO (AXL) is an important mediator of SARS-CoV-2 entry and may be of higher relevance for  
417 infection of the lung than ACE2<sup>58</sup>. The effect of entry via AXL in the two cell lines used may be  
418 overshadowed by high levels of ACE2 expression. Alternatively, additional factors could underlie  
419 this difference, including the presence of additional mutations outside of the S protein or  
420 differences of viral loads across sampling times *in vivo* during the infection.

421 Increased temperature stability can potentially confer a fitness advantage to the virus by  
422 reducing losses to infectivity during environmental transition between hosts. Hence, we also  
423 examined whether these mutations altered the temperature stability of the virions. Overall, no  
424 major difference in stability was observed between VSV pseudoparticles bearing the D614,  
425 D614G, 20E, or B.1.177.637 S protein genotypes (Figure 3d). Hence, changes in protein stability  
426 are unlikely to underlie the increased transmission of these variants.

427 Finally, as the S protein is a major target of the immune response<sup>12</sup>, immune evasion represents  
428 one possible consequence of mutations in this protein. Both S positions 1163 and 1167 are  
429 embedded in experimentally confirmed T cell and B cell epitopes. For T cell epitopes, a predicted

430 HLA-II epitopes including position 1163 and 1167 has been experimentally verified to bind to  
431 HLA DRB1\*01:01, the prototype molecule for the DR supertype (epitope identifier in Immune  
432 Epitope Data Base: 9006<sup>59</sup>). Additionally, D1163 is included in a SARS-CoV-2 T cell epitope  
433 eliciting T-cell responses in convalescent COVID-19 cases<sup>60</sup> as well as in SARS-CoV-2-naïve  
434 individuals<sup>53</sup>, indicating cross-reactivity in epitopes involving these regions. B cell linear epitopes  
435 that span D1163 and G1167 have also been reported<sup>52</sup>, with D1163 belonging to a dominant  
436 linear B cell epitope recognized by more than 40% COVID-19 patients used in the assay<sup>54</sup>. D1163  
437 is fully solvent exposed in available structure<sup>18,45</sup>, making its side-chain easily accessible to  
438 antibodies, providing a potential mechanism for altering antibody binding. To directly examine  
439 whether the mutated S positions 1163 and 1167 influence susceptibility to pre-existing humoral  
440 immunity, we examined the neutralization capacity of convalescent sera against the 20E variant  
441 or B.1.177.637. For this, we used sera from both the first (April 2020) and second (October 2020)  
442 waves of the infection in Spain, because an almost complete replacement of SARS-CoV-2 S  
443 variants occurred between these two times of the pandemic in Spain<sup>36</sup>. When utilizing sera from  
444 donors infected during the first wave of the pandemic in Spain, we found a modest but  
445 statistically significant reduction in susceptibility to neutralization of the B.1.177.637 S genotype  
446 compared to the 20E S genotype of approximately 6-fold (Figure 4a). However, no difference in  
447 neutralization was observed between the two variants when sera from patients infected during  
448 the second wave was used (Figure 4b), highlighting variant-specific differences in antibody  
449 responses. Overall, the magnitude of the observed reduction in neutralization susceptibility to  
450 sera from individuals infected during the first wave was much less pronounced than that  
451 observed for other genotypes implicated in immune evasion<sup>31</sup>. Nevertheless, the degree of  
452 reduced neutralization required to confer a biologically relevant fitness advantage *in vivo* has  
453 not been established, and even relatively small reductions in susceptibility to antibody  
454 neutralizations could potentially confer a significant advantage to replication. Indeed, this has  
455 been suggested to be the case in an immunosuppressed individual treated with convalescent

456 serum, where mutations selected during the course of treatment conferred a similar reduction  
457 to that observed in the current study<sup>61</sup>. Finally, no evidence was found for reduced neutralization  
458 by sera from donors immunized with the BNT162b2 vaccine (Figure 4c), which is based on the  
459 Wuhan S genotype, indicating antibody immunity elicited by Pfizer-BioNTech COVID-19 vaccine  
460 (BNT162b2; February 2021) would not be affected by amino acid replacements in 1163 and 1167  
461 sites in S protein.

462 Although further experiments are needed to decipher the mechanisms by which the two S  
463 mutations identified could confer a selective advantage to the virus, the evidence presented  
464 supports B.1.177.637 as a VOI (VOI1163.7.V1) according to recently published criteria<sup>4</sup>. First,  
465 amino acid replacements in S protein: D1163Y and G1167V lead to changes associated with  
466 suspected phenotypic change because of the rigidity it poses to the S protein. Second, the  
467 genotype showed moderate but significantly lower antibody susceptibility compared to 20E S  
468 genotype. And third, it has been identified to cause community transmission, appearing in  
469 multiple COVID-19 cases, and detected in multiple countries. Additionally, a subgroup within  
470 B.1.177.637 (denoted as VOI1163.7.V2) includes two additional mutations leading to amino acid  
471 changes in S with established phenotypic impact on humoral immunity: E484K<sup>62</sup> and 141-  
472 144Del<sup>40,63</sup>.

473 Whether VOI1163.7.V1 and VOI1163.7.V2 will continue to increase in frequency and accumulate  
474 additional mutations that could improve its fitness and/or present challenges to vaccines or  
475 diagnostics remains to be seen. However, their characterization as VOI would help to discover if  
476 enough evidence holds to consider them VOC and therefore required monitoring.

## 477 **Methods**

### 478 **Whole-genome sequencing and genome assembly of SeqCOVID consortium sequences**

479 A total of 5,017 clinical samples were received, sequenced, and analysed by the SeqCOVID  
480 consortium from all autonomous communities of Spain. These samples were confirmed as SARS-  
481 CoV-2 positive by RT-PCR carried out by Clinical Microbiology Services from each hospital.  
482 Sequencing of the samples has been approved by the ethics committee: Comité Ético de  
483 Investigación de Salud Pública y Centro Superior de Investigación en Salud Pública (CEI DGSP-  
484 CSISP) Nº 20200414/05. All sequences are available at GISAID under the accession numbers  
485 detailed in Supplementary table 4.

486 For sequencing, RNA samples were retro-transcribed into cDNA. SARS-CoV-2 complete genome  
487 amplification was performed in two multiplex PCR, according to the protocol developed by the  
488 ARTIC network<sup>64</sup>, using the V3 multiplex primers scheme<sup>65</sup>. From this step, two amplicon pools  
489 were prepared, combined, and used for library preparation. The genomic libraries were  
490 constructed with the Nextera DNA Flex Sample Preparation kit (Illumina Inc., San Diego, CA)  
491 according to the manufacturer's protocol, with 5 cycles for indexing PCR. Whole-genome  
492 sequencing was performed in the MiSeq platform (2×200 cycles paired-end run; Illumina).

493 Reads obtained were processed through a bioinformatic pipeline based on iVar<sup>66</sup>, available at  
494 <https://gitlab.com/fisabio-ngs/sars-cov2-mapping>. The first step in the pipeline removed human  
495 reads with Kraken<sup>67</sup>; then fastq files were filtered using fastp<sup>68</sup> v 0.20.1 (arguments employed:  
496 --cut tail, --cut-window-size, --cut-mean-quality, -max\_len1, -max\_len2). Finally, mapping and  
497 variant calling were performed with iVar v 1.2, and quality control assessment was carried out  
498 with MultiQC<sup>69</sup>.

499 **Analysis of the *spike* gene of sarbecoviruses related to SARS-CoV-2**

500 14 sequences including SARS-COV-2 belonging to sarbecoviruses, sequences were annotated  
501 with annotation files available at NCBI database in order to locate the *spike* gene coordinates  
502 (accession numbers are available at supplemental table 1). For each sequence, nucleotide  
503 coordinates belonging to this gene were extracted with EMBOSS<sup>70</sup>. The 14 sequences harbouring  
504 the *spike* gene were concatenated and aligned with MEGA-X<sup>71</sup> using amino acids with ClustalW  
505 algorithm with default options (alignment is available at  
506 [https://github.com/PathoGenOmics/B.1.177.637\\_SARS-CoV-2](https://github.com/PathoGenOmics/B.1.177.637_SARS-CoV-2))

507 **Sampling SARS-CoV-2 from non-Spanish consortium sequences**

508 To build the global alignment, sequences were downloaded from GISAID<sup>1</sup> including all the  
509 pandemic periods since the first known case sequenced (from 24 December 2019) until the last  
510 sample on 22 December 2020. We used two filters to select the dataset: sequences with more  
511 than 29,000 bp, and sequences with known dates of sampling. Sequences downloaded from  
512 GISAID were aligned against the SARS-CoV-2 reference genome<sup>72</sup> using MAFFT<sup>73</sup>, omitting all  
513 insertions and getting an alignment length of 29,903 bp. The final alignment constructed  
514 included 270,869 sequences, all sequences with GISAID ID used for this study are available in  
515 Supplementary Table 5.

516 **Frequency and detection of mutated positions**

517 Single nucleotide variants were detected using the global dataset alignment, generating a VCF  
518 file with SNP-sites<sup>74</sup> v 2.5.1 (argument employed: -v), using the reference genome as the  
519 reference bases for detecting mutations. This VCF file was processed with a Python script  
520 (available at [https://github.com/PathoGenOmics/B.1.177.637\\_SARS-CoV-2](https://github.com/PathoGenOmics/B.1.177.637_SARS-CoV-2)) to assess all  
521 mutated samples by position, calculating the frequencies of the global dataset and annotating  
522 sequences with the detected mutations. After that, the mutated positions were annotated with

523 snpEff<sup>75</sup> v 5.0 using SARS-CoV-2 reference (Wuhan first sequenced) database annotation  
524 (arguments employed: -c, -noStats, -no-downstream, -no-upstream, NC\_045512.2).

525 Genotypes detected that involved mutations in 1163 and 1167 such as B.1.177.637 and cluster  
526 163.654 were represented in a circos plot with the R package circlize<sup>76</sup> v 0.4.12.1004. Nucleotide  
527 coordinates of SARS-CoV-2 are plotted in a non-closed circle, circle is annotated and coloured  
528 with genes of the virus, and mutated nucleotide positions of each genotype are connected  
529 between them through lines.

### 530 **Alignments**

531 For the phylogenetic analysis, a reduced dataset was selected from the 270,869 sequences.  
532 Duplicated sequences were removed with seqkit v 0.13.2 (arguments employed: rmdup -s).  
533 8,397 sequences were selected at random with the same temporal distribution by month as the  
534 initial dataset by Python scripting (available at [https://github.com/PathoGenOmics/  
535 B.1.177.637\\_SARS-CoV-2](https://github.com/PathoGenOmics/B.1.177.637_SARS-CoV-2)). The 8,397 sequences were concatenated with 2,053 sequences  
536 selected as indicate above because harboured amino acid replacements in D1163 and G1167 of  
537 the S protein and resulted in an alignment of 10,450 sequences (Supplementary Table 6).

538 The dataset to represent 20I/501Y.V1 phylogenetic relationships include 3,067 randomly  
539 selected samples identified by Pangolin typing system ([https://github.com/cov-  
540 lineages/pangolin](https://github.com/cov-lineages/pangolin)) as lineage B.1.1.7 plus the 33 sequences with amino acid replacements in  
541 D1163 and/or G1167 (Supplementary Table 7).

542 For all the alignments, problematic positions reported by Lanfear, R.<sup>77</sup> were masked for the  
543 phylogenetic reconstruction using masked\_alignment.sh script.

544 **Phylogenetic analysis**

545 Maximum-likelihood phylogenies in Figure 1 and supplementary Supplementary Fig.2, S4 and S5  
546 were reconstructed from the masked alignment using IQ-TREE<sup>78</sup> v 1.6.12 with GTR model and  
547 collapsing near-zero branches (arguments employed: -czb, -m GTR). The phylogenies were  
548 rooted in the reference sequence from Wuhan<sup>72</sup> on 2019-12-24. The phylogenies were  
549 annotated and visualized with iTOL<sup>79</sup> v 4.

550 The phylogeny in Supplementary Video S1, composed by 10,450 sequences, was build up with  
551 Nextstrain pipeline (available at <https://github.com/nextstrain/augur>) in order to monitor and  
552 visualize temporal and geographical transmission of B.1.177.637. This dataset file is available at  
553 [https://github.com/PathoGenOmics/B.1.177.637\\_SARS-CoV-2](https://github.com/PathoGenOmics/B.1.177.637_SARS-CoV-2).

554 **Clusters of transmission involving 1163 and 1167 S amino acid replacements.**

555 We used the phylogeny of 10,450 sequences enriched with all sequences mutated in 1163 and  
556 1167 to quantify the minimum number of mutational events involving positions 1163 and 1167  
557 in S protein. We first defined which mutations characterize internal nodes using R packages:  
558 tidytree v 0.3.3 and treeio v 1.14.3<sup>80</sup>. We then depicted monophyletic clusters sharing at least  
559 one of the two mutations. Transmission clusters were defined as all sequences that: i) are  
560 derived from an internal node characterized by the same nucleotide mutation involving 1163 or  
561 1167 amino acid replacements, ii) include more than one sequence, and iii) at least 95% of  
562 sequences share the nucleotide mutation. Additionally, redundant nodes were eliminated,  
563 keeping the ancestral node of the cluster (harbouring the largest number of leaves). Sequences  
564 with at least one mutation but not in clusters were counted as single events of mutation in the  
565 phylogeny.

566 **Structural analysis of 1163 and 1167 S amino acid replacements.**

567 The atomic coordinates for S protein in pre-fusion state was retrieved from the CHARMM-GUI  
568 COVID-19 Archive (<http://www.charmm-gui.org/docs/archive/covid19>). The atomic coordinates  
569 for S protein in post-fusion state were retrieved from Protein Data Bank (PDB: 6XRA<sup>18</sup> and PDB:  
570 6LXT<sup>81</sup>). Mutations were introduced using single mutation tool embedded in COOT<sup>82</sup> and figures  
571 were generated with PyMOL ([www.pymol.org](http://www.pymol.org)).

## 572 **SARS-CoV-2 pseudotyped vesicular stomatitis virus production, titration, and thermal stability** 573 **evaluation**

574 Mutations were introduced into a plasmid encoding a codon-optimized S protein<sup>16</sup> by site  
575 directed mutagenesis (see Supplementary table 8 for primers). All mutations were verified by  
576 Sanger sequencing (see Supplementary table 9 for primers). To evaluate the efficiency of virus  
577 production, three transfections in HEK293 cells (CRL-1573 from ATCC) were performed for each  
578 plasmid to generate pseudotyped VSV harbouring the indicated S protein<sup>83</sup>. The titers of the  
579 virus produced were then assayed by serial dilution, followed by infection of either Vero cells  
580 (CCL-81 from ATCC) or A549 cells expressing ACE2 and TMPRSS2 (InvivoGen catalog code a549-  
581 hacc2tpsa), and counting of GFP positive cells (focus forming units; FFU) at 16 hours post  
582 infection. Statistical comparisons were performed by unpaired t-test (R package: stats v 3.6.1)  
583 with normalized logarithmic data. For assessing thermal stability, 1000 FFU (as measured on  
584 Vero cells) were incubated for 15 minutes at 30.4, 31.4, 33, 35.2, 38.2, 44.8, 47, 48.6 or 49.6°C  
585 before addition to Vero cells previously seeded in a 96 well plate (10,000 cells/well). GFP signal  
586 in each well was determined 16 hours post-infection using an Incucyte S3 (Essen Biosciences).  
587 The mean GFP signal observed in several mock-infected wells was subtracted from all infected  
588 wells, followed by standardization of the GFP signal to the mean GFP signal from wells incubated  
589 at 30.4°C. Finally, a three parameter log-logistic function was fitted to the data using the drc  
590 package v 3.0-1 in R (LL.3 function) and the temperature resulting in 50% inhibition calculated  
591 using the drc ED function. Statistical differences in the temperature resulting in 50% reduction



592 of infection was evaluated using the drc EDcomp function. The data and scripts for analysing the  
593 temperature resistance of the different mutants is available at  
594 [https://github.com/PathoGenOmics/B.1.177.637\\_SARS-CoV-2](https://github.com/PathoGenOmics/B.1.177.637_SARS-CoV-2).

#### 595 **Evaluation of neutralization by convalescent sera and efficacy of virus particle production.**

596 Pseudotyped VSV bearing 20E or B.1.177.637 S variants were evaluated for sensitivity to  
597 neutralization by convalescent sera as previously described<sup>83</sup> with slight modifications. Briefly,  
598 16-hours post-infection, GFP signal in each well was determined using an Incucyte S3 (Essen  
599 Biosciences). The mean GFP signal observed in several mock-infected wells was subtracted from  
600 all infected wells, followed by standardization of the GFP signal in each well infected with  
601 antibody-treated virus to that of the mean GFP signal from wells infected with mock-treated  
602 virus. Any negative values resulting from background subtraction were arbitrarily assigned a low,  
603 non-zero value ( $10^{-5}$ ). The serum dilutions were then converted to their reciprocal, their  
604 logarithm ( $\text{Log}_{10}$ ) was taken, and the dose resulting in 50% (ID50) or 80% (ID80) reduction in GFP  
605 signal was calculated in R using the drc package v 3.0-1. A two-parameter log-logistic regression  
606 (LL2 function) was used for all samples except when a three-parameter logistic regression  
607 provided a significant improvement to fit, as judged by the ANOVA function in the drc package  
608 (e.g.  $p < 0.05$  following multiple testing correction using the Bonferroni method). The script for  
609 calculating the ID50 and ID80 as well as the standardized GFP signal for each condition is  
610 available at [https://github.com/PathoGenOmics/B.1.177.637\\_SARS-CoV-2](https://github.com/PathoGenOmics/B.1.177.637_SARS-CoV-2). For the first wave,  
611 serum samples and data from patients included in this study were provided by the Consorcio  
612 Hospital General de Valencia Biobank, integrated in the Valencian Biobanking Network, and they  
613 were processed following standard operating procedures with the appropriate approval of the  
614 Ethics and Scientific Committees. All first wave samples were obtained from donors that were  
615 admitted to the intensive care unit and were collected during April 2020. For the second wave  
616 donors, sera were obtained (October 2020) from severe COVID-19 patients requiring inpatient

617 treatment at Hospital Universitario y Politécnico La Fe de Valencia. Similarly, samples from  
618 immunized donors were collected at Hospital Universitario y Politécnico La Fe de Valencia from  
619 hospital health-workers, with no previous history of SARS-COV-2 infection, and after receiving a  
620 second dose of Pfizer-BioNTech COVID-19 vaccine (BNT162b2; February 2021). All samples from  
621 Hospital Universitario y Politécnico La Fe de Valencia were collected after informed written  
622 consent and the project has been approved by the ethical committee and institutional review  
623 board (registration number 2020-123-1).

## 624 **Acknowledgments**

625 We want to particularly acknowledge the patients and the Consorcio Hospital General de  
626 Valencia Biobank integrated in the Valencian Biobanking Network for their collaboration, as well  
627 as the patients and hospital staff at Hospital Universitario y Politécnico La Fe de Valencia. In  
628 addition, the authors would like to thank Gert Zimmer (Institute of Virology and Immunology,  
629 Mittelhäusern/Switzerland), Stefan Pohlmann, and Markus Hoffmann (German Primate Center,  
630 Infection Biology Unit, Goettingen/Germany) for providing the reagents required for the  
631 generation of VSV pseudotyped viruses and the codon-optimized S plasmid.

632 Also, we want to acknowledge all the efforts from different laboratories and authorities  
633 submitting all possible sequences of SARS-CoV-2 worldwide and making them available on the  
634 GISAID platform.

## 635 **Funding**

636 M.C. and R.G. are supported by Ramón y Cajal program from Ministerio de Ciencia. This work  
637 was funded by the Instituto de Salud Carlos III project COV20/00140 and COV20/00437, Spanish  
638 National Research Council project CSIC-COV19-021 and CSIC-COVID19-082, and the Generalitat  
639 Valenciana (SEJI/2019/011 and Covid\_19-SCI).

640 Action co-financed by the European Union through the Operational Program of the European  
641 Regional Development Fund (ERDF) of the Valencian Community 2014-2020.

## 642 **References**

- 643 1. Elbe, S. & Buckland-Merrett, G. Data, disease and diplomacy: GISAID's innovative  
644 contribution to global health. *Glob Chall* **1**, 33-46 (2017).
- 645 2. Hadfield, J. *et al.* Nextstrain: real-time tracking of pathogen evolution. *Bioinformatics*  
646 **34**, 4121-4123 (2018).
- 647 3. Luring, A.S. & Hodcroft, E.B. Genetic Variants of SARS-CoV-2-What Do They Mean?  
648 *Jama* **325**, 529-531 (2021).
- 649 4. WHO. COVID-19 Weekly Epidemiological Update 2021-02-25 .  
650 ([https://www.who.int/docs/default-source/coronaviruse/situation-](https://www.who.int/docs/default-source/coronaviruse/situation-reports/20210225-weekly-epi-update-voc-special-edition.pdf)  
651 [reports/20210225-weekly-epi-update-voc-special-edition.pdf](https://www.who.int/docs/default-source/coronaviruse/situation-reports/20210225-weekly-epi-update-voc-special-edition.pdf), 2021).
- 652 5. Volz, E. *et al.* Evaluating the Effects of SARS-CoV-2 Spike Mutation D614G on  
653 Transmissibility and Pathogenicity. *Cell* **184**, 64-75.e11 (2020).
- 654 6. Hodcroft, E.B. *et al.* Emergence and spread of a SARS-CoV-2 variant through Europe in  
655 the summer of 2020. *medRxiv*, 2020.10.25.20219063. Preprint at  
656 <https://www.medrxiv.org/content/10.1101/2020.10.25.20219063v2> (2020).
- 657 7. Oude Munnink, B.B. *et al.* Transmission of SARS-CoV-2 on mink farms between humans  
658 and mink and back to humans. *Science* **371**, 172 (2021).
- 659 8. Richard, D., Owen, C.J., van Dorp, L. & Balloux, F. No detectable signal for ongoing  
660 genetic recombination in SARS-CoV-2. *bioRxiv*, 2020.12.15.422866. Preprint at  
661 <https://www.biorxiv.org/content/10.1101/2020.12.15.422866v1> (2020).
- 662 9. Welkers, M.R.A., Han, A.X., Reusken, C. & Eggink, D. Possible host-adaptation of SARS-  
663 CoV-2 due to improved ACE2 receptor binding in mink. *Virus Evol* **7**, veaa094 (2021).

- 664 10. Young, B.E. *et al.* Effects of a major deletion in the SARS-CoV-2 genome on the severity  
665 of infection and the inflammatory response: an observational cohort study. *Lancet*  
666 **396**, 603-611 (2020).
- 667 11. Chand, M. *et al.* Investigation of novel SARS-COV-2 variant Variant of Concern  
668 202012/01. (Public Health England,  
669 [https://assets.publishing.service.gov.uk/government/uploads/system/uploads/attach](https://assets.publishing.service.gov.uk/government/uploads/system/uploads/attachment_data/file/959438/Technical_Briefing_VOC_SH_NJL2_SH2.pdf)  
670 [ment\\_data/file/959438/Technical\\_Briefing\\_VOC\\_SH\\_NJL2\\_SH2.pdf](https://assets.publishing.service.gov.uk/government/uploads/system/uploads/attachment_data/file/959438/Technical_Briefing_VOC_SH_NJL2_SH2.pdf), 2020).
- 671 12. Walls, A.C. *et al.* Structure, Function, and Antigenicity of the SARS-CoV-2 Spike  
672 Glycoprotein. *Cell* **181**, 281-292.e6 (2020).
- 673 13. Salvatori, G. *et al.* SARS-CoV-2 SPIKE PROTEIN: an optimal immunological target for  
674 vaccines. *Journal of Translational Medicine* **18**, 222 (2020).
- 675 14. Turoňová, B. *et al.* In situ structural analysis of SARS-CoV-2 spike reveals flexibility  
676 mediated by three hinges. *Science* **370**, 203 (2020).
- 677 15. Hoffmann, M., Kleine-Weber, H. & Pöhlmann, S. A Multibasic Cleavage Site in the Spike  
678 Protein of SARS-CoV-2 Is Essential for Infection of Human Lung Cells. *Mol Cell* **78**, 779-  
679 784.e5 (2020).
- 680 16. Hoffmann, M. *et al.* SARS-CoV-2 Cell Entry Depends on ACE2 and TMPRSS2 and Is  
681 Blocked by a Clinically Proven Protease Inhibitor. *Cell* **181**, 271-280.e8 (2020).
- 682 17. Kielian, M. Mechanisms of Virus Membrane Fusion Proteins. *Annu Rev Virol* **1**, 171-89  
683 (2014).
- 684 18. Cai, Y. *et al.* Distinct conformational states of SARS-CoV-2 spike protein. *Science* **369**,  
685 1586 (2020).
- 686 19. Korber, B. *et al.* Tracking Changes in SARS-CoV-2 Spike: Evidence that D614G Increases  
687 Infectivity of the COVID-19 Virus. *Cell* **182**, 812-827.e19 (2020).
- 688 20. Hou, Y.J. *et al.* SARS-CoV-2 D614G variant exhibits efficient replication ex vivo and  
689 transmission in vivo. *Science* **370**, 1464-1468 (2020).

- 690 21. Plante, J.A. *et al.* Spike mutation D614G alters SARS-CoV-2 fitness. *Nature* (2020).
- 691 22. Zhou, B. *et al.* SARS-CoV-2 spike D614G change enhances replication and transmission.  
692 *Nature* (2021).
- 693 23. Daniloski, Z. *et al.* The Spike D614G mutation increases SARS-CoV-2 infection of  
694 multiple human cell types. *Elife* **10**(2021).
- 695 24. Larsen, H.D. *et al.* Preliminary report of an outbreak of SARS-CoV-2 in mink and mink  
696 farmers associated with community spread, Denmark, June to November 2020. *Euro*  
697 *Surveill* **26**(2021).
- 698 25. Rodrigues, J. *et al.* Insights on cross-species transmission of SARS-CoV-2 from  
699 structural modeling. *PLoS Comput Biol* **16**, e1008449 (2020).
- 700 26. Hodcroft, E.B. CoVariants: SARS-CoV-2 Mutations and Variants of Interest.  
701 (<https://covariants.org/variants/>, 2021).
- 702 27. Leung, K., Shum, M.H., Leung, G.M., Lam, T.T. & Wu, J.T. Early transmissibility  
703 assessment of the N501Y mutant strains of SARS-CoV-2 in the United Kingdom,  
704 October to November 2020. *Euro Surveill* **26**(2021).
- 705 28. Galloway, S. *et al.* Emergence of SARS-CoV-2 B.1.1.7 Lineage — United States,  
706 December 29, 2020–January 12, 2021. *MMWR. Morbidity and Mortality Weekly Report*  
707 **70**(2021).
- 708 29. Davies, N.G. *et al.* Estimated transmissibility and impact of SARS-CoV-2 lineage B.1.1.7  
709 in England. *Science*, eabg3055 (2021).
- 710 30. Wang, Z. *et al.* mRNA vaccine-elicited antibodies to SARS-CoV-2 and circulating  
711 variants. *Nature* (2021).
- 712 31. Wibmer, C.K. *et al.* SARS-CoV-2 501Y.V2 escapes neutralization by South African  
713 COVID-19 donor plasma. *bioRxiv*, 2021.01.18.427166. Preprint at  
714 <https://www.biorxiv.org/content/10.1101/2021.01.18.427166v2> (2021).

- 715 32. Muik, A. *et al.* Neutralization of SARS-CoV-2 lineage B.1.1.7 pseudovirus by BNT162b2  
716 vaccine-elicited human sera. *bioRxiv*, 2021.01.18.426984. Preprint at  
717 <https://www.biorxiv.org/content/10.1101/2021.01.18.426984v1> (2021).
- 718 33. Madhi, S.A. *et al.* Safety and efficacy of the ChAdOx1 nCoV-19 (AZD1222) Covid-19  
719 vaccine against the B.1.351 variant in South Africa. *medRxiv*, 2021.02.10.21251247.  
720 Preprint at <https://www.medrxiv.org/content/10.1101/2021.02.10.21251247v1>  
721 (2021).
- 722 34. Washington, N.L. *et al.* Genomic epidemiology identifies emergence and rapid  
723 transmission of SARS-CoV-2 B.1.1.7 in the United States. *medRxiv*,  
724 2021.02.06.21251159. Preprint at  
725 <https://www.medrxiv.org/content/10.1101/2021.02.06.21251159v1> (2021).
- 726 35. Tegally, H. *et al.* Emergence and rapid spread of a new severe acute respiratory  
727 syndrome-related coronavirus 2 (SARS-CoV-2) lineage with multiple spike mutations in  
728 South Africa. *medRxiv*, 2020.12.21.20248640. Preprint at  
729 <https://www.medrxiv.org/content/10.1101/2020.12.21.20248640v1> (2020).
- 730 36. López, M.G. *et al.* The first wave of the Spanish COVID-19 epidemic was associated  
731 with early introductions and fast spread of a dominating genetic variant. *medRxiv*,  
732 2020.12.21.20248328. Preprint at  
733 <https://www.medrxiv.org/content/10.1101/2020.12.21.20248328v1> (2020) (2020).
- 734 37. Rambaut, A. *et al.* A dynamic nomenclature proposal for SARS-CoV-2 lineages to assist  
735 genomic epidemiology. *Nature Microbiology* **5**, 1403-1407 (2020).
- 736 38. Nelson, G. *et al.* Molecular dynamic simulation reveals E484K mutation enhances spike  
737 RBD-ACE2 affinity and the combination of E484K, K417N and N501Y mutations  
738 (501Y.V2 variant) induces conformational change greater than N501Y mutant alone,  
739 potentially resulting in an escape mutant. *bioRxiv*, 2021.01.13.426558. Preprint at  
740 <https://www.biorxiv.org/content/10.1101/2021.01.13.426558v1> (2021).

- 741 39. Liu, Z. *et al.* Landscape analysis of escape variants identifies SARS-CoV-2 spike  
742 mutations that attenuate monoclonal and serum antibody neutralization. *bioRxiv*,  
743 2020.11.06.372037. Preprint at  
744 <https://www.biorxiv.org/content/10.1101/2020.11.06.372037v2> (2021).
- 745 40. McCallum, M. *et al.* N-terminal domain antigenic mapping reveals a site of  
746 vulnerability for SARS-CoV-2. *bioRxiv*, 2021.01.14.426475. Preprint at  
747 <https://www.biorxiv.org/content/10.1101/2021.01.14.426475v1> (2021).
- 748 41. Huang, Y., Yang, C., Xu, X.-f., Xu, W. & Liu, S.-w. Structural and functional properties of  
749 SARS-CoV-2 spike protein: potential antiviral drug development for COVID-19. *Acta*  
750 *Pharmacologica Sinica* **41**, 1141-1149 (2020).
- 751 42. Xia, S. *et al.* Fusion mechanism of 2019-nCoV and fusion inhibitors targeting HR1  
752 domain in spike protein. *Cellular & Molecular Immunology* **17**, 765-767 (2020).
- 753 43. Lu, R. *et al.* Genomic characterisation and epidemiology of 2019 novel coronavirus:  
754 implications for virus origins and receptor binding. *The Lancet* **395**, 565-574 (2020).
- 755 44. Xia, S. *et al.* Peptide-Based Membrane Fusion Inhibitors Targeting HCoV-229E Spike  
756 Protein HR1 and HR2 Domains. *Int J Mol Sci* **19**(2018).
- 757 45. Fan, X., Cao, D., Kong, L. & Zhang, X. Cryo-EM analysis of the post-fusion structure of  
758 the SARS-CoV spike glycoprotein. *Nature Communications* **11**, 3618 (2020).
- 759 46. Woo, H. *et al.* Developing a Fully Glycosylated Full-Length SARS-CoV-2 Spike Protein  
760 Model in a Viral Membrane. *The Journal of Physical Chemistry B* **124**, 7128-7137  
761 (2020).
- 762 47. Zhang, L. *et al.* SARS-CoV-2 spike-protein D614G mutation increases virion spike  
763 density and infectivity. *Nature Communications* **11**, 6013 (2020).
- 764 48. Yurkovetskiy, L. *et al.* Structural and Functional Analysis of the D614G SARS-CoV-2  
765 Spike Protein Variant. *Cell* **183**, 739-751.e8 (2020).

- 766 49. Wang, Y. *et al.* The Infectivity and Antigenicity of Epidemic SARS-CoV-2 Variants in the  
767 United Kingdom. *Research Square* (2021).
- 768 50. Berger Rentsch, M. & Zimmer, G. A vesicular stomatitis virus replicon-based bioassay  
769 for the rapid and sensitive determination of multi-species type I interferon. *PLoS One*  
770 **6**, e25858 (2011).
- 771 51. Weissman, D. *et al.* D614G Spike Mutation Increases SARS CoV-2 Susceptibility to  
772 Neutralization. *Cell Host & Microbe* **29**, 23-31.e4 (2021).
- 773 52. Li, Y. *et al.* Linear epitopes of SARS-CoV-2 spike protein elicit neutralizing antibodies in  
774 COVID-19 patients. *Cellular & Molecular Immunology* **17**, 1095-1097 (2020).
- 775 53. Mateus, J. *et al.* Selective and cross-reactive SARS-CoV-2 T cell epitopes in unexposed  
776 humans. *Science* **370**, 89-94 (2020).
- 777 54. Yi, Z. *et al.* Functional mapping of B-cell linear epitopes of SARS-CoV-2 in COVID-19  
778 convalescent population. *Emerg Microbes Infect* **9**, 1988-1996 (2020).
- 779 55. Zhao, J. *et al.* COVID-19: Coronavirus Vaccine Development Updates. *Frontiers in*  
780 *Immunology* **11**, 3435 (2020).
- 781 56. Izda, V., Jeffries, M.A. & Sawalha, A.H. COVID-19: A review of therapeutic strategies  
782 and vaccine candidates. *Clinical Immunology* **222**, 108634 (2021).
- 783 57. Pond, S. Natural selection analysis of global SARS-CoV-2/COVID-19 enabled by data  
784 from GISAID. ([https://observablehq.com/@spond/revised-sars-cov-2-analytics-](https://observablehq.com/@spond/revised-sars-cov-2-analytics-page?collection=@spond/sars-cov-2)  
785 [page?collection=@spond/sars-cov-2](https://observablehq.com/@spond/sars-cov-2)).
- 786 58. Wang, S. *et al.* AXL is a candidate receptor for SARS-CoV-2 that promotes infection of  
787 pulmonary and bronchial epithelial cells. *Cell Research* **31**, 126-140 (2021).
- 788 59. Vita, R. *et al.* The immune epitope database (IEDB) 3.0. *Nucleic Acids Research* **43**,  
789 D405-D412 (2015).



- 790 60. Tarke, A. *et al.* Comprehensive analysis of T cell immunodominance and  
791 immunoprevalence of SARS-CoV-2 epitopes in COVID-19 cases. *Cell Reports Medicine*  
792 **2**, 100204 (2021).
- 793 61. Kemp, S.A. *et al.* SARS-CoV-2 evolution during treatment of chronic infection. *Nature*  
794 (2021).
- 795 62. Collier, D.A. *et al.* SARS-CoV-2 B.1.1.7 sensitivity to mRNA vaccine-elicited,  
796 convalescent and monoclonal antibodies. *medRxiv*, 2021.01.19.21249840. Preprint at  
797 <https://www.medrxiv.org/content/10.1101/2021.01.19.21249840v4> (2021).
- 798 63. Wang, P. *et al.* Antibody Resistance of SARS-CoV-2 Variants B.1.351 and B.1.1.7.  
799 *bioRxiv*, 2021.01.25.428137. Preprint at  
800 <https://www.biorxiv.org/content/10.1101/2021.01.25.428137v2> (2021).
- 801 64. Quick, J. nCoV-2019 sequencing protocol. ([https://www.protocols.io/view/ncov-2019-](https://www.protocols.io/view/ncov-2019-sequencing-protocol-bbmuik6w.pdf)  
802 [sequencing-protocol-bbmuik6w.pdf](https://www.protocols.io/view/ncov-2019-sequencing-protocol-bbmuik6w.pdf), 2020).
- 803 65. Artic-network/artic-ncov2019. (Artic-network, [https://github.com/artic-network/artic-](https://github.com/artic-network/artic-ncov2019)  
804 [ncov2019](https://github.com/artic-network/artic-ncov2019), 2020).
- 805 66. Grubaugh, N.D. *et al.* An amplicon-based sequencing framework for accurately  
806 measuring intrahost virus diversity using PrimalSeq and iVar. *Genome Biol* **20**, 8 (2019).
- 807 67. Wood, D.E. & Salzberg, S.L. Kraken: ultrafast metagenomic sequence classification  
808 using exact alignments. *Genome Biol* **15**, R46 (2014).
- 809 68. Chen, S., Zhou, Y., Chen, Y. & Gu, J. fastp: an ultra-fast all-in-one FASTQ preprocessor.  
810 *Bioinformatics* **34**, i884-i890 (2018).
- 811 69. Ewels, P., Magnusson, M., Lundin, S. & Källér, M. MultiQC: summarize analysis results  
812 for multiple tools and samples in a single report. *Bioinformatics* **32**, 3047-8 (2016).
- 813 70. Rice, P., Longden, I. & Bleasby, A. EMBOSS: The European molecular biology open  
814 software suite. *Trends in Genetics* **16**, 276-277 (2000).

- 815 71. Kumar, S., Stecher, G., Li, M., Knyaz, C. & Tamura, K. MEGA X: Molecular Evolutionary  
816 Genetics Analysis across Computing Platforms. *Mol Biol Evol* **35**, 1547-1549 (2018).
- 817 72. Wu, F. *et al.* A new coronavirus associated with human respiratory disease in China.  
818 *Nature* **579**, 265-269 (2020).
- 819 73. Katoh, K., Misawa, K., Kuma, K. & Miyata, T. MAFFT: a novel method for rapid multiple  
820 sequence alignment based on fast Fourier transform. *Nucleic Acids Res* **30**, 3059-66  
821 (2002).
- 822 74. Page, A.J. *et al.* SNP-sites: rapid efficient extraction of SNPs from multi-FASTA  
823 alignments. *Microb Genom* **2**, e000056 (2016).
- 824 75. Cingolani, P. *et al.* A program for annotating and predicting the effects of single  
825 nucleotide polymorphisms, SnpEff: SNPs in the genome of *Drosophila melanogaster*  
826 strain w11118; iso-2; iso-3. *Fly* **6**, 80-92 (2012).
- 827 76. Gu, Z., Gu, L., Eils, R., Schlesner, M. & Brors, B. circlize implements and enhances  
828 circular visualization in R. *Bioinformatics* **30**, 2811-2812 (2014).
- 829 77. Lanfear, R. A global phylogeny of SARS-CoV-2 sequences from GISAID. (Zenodo, 2020).
- 830 78. Nguyen, L.T., Schmidt, H.A., von Haeseler, A. & Minh, B.Q. IQ-TREE: a fast and effective  
831 stochastic algorithm for estimating maximum-likelihood phylogenies. *Mol Biol Evol* **32**,  
832 268-74 (2015).
- 833 79. Letunic, I. & Bork, P. Interactive Tree Of Life (iTOL) v4: recent updates and new  
834 developments. *Nucleic Acids Research* **47**, W256-W259 (2019).
- 835 80. Wang, L.G. *et al.* Treeio: An R Package for Phylogenetic Tree Input and Output with  
836 Richly Annotated and Associated Data. *Mol Biol Evol* **37**, 599-603 (2020).
- 837 81. Xia, S. *et al.* Inhibition of SARS-CoV-2 (previously 2019-nCoV) infection by a highly  
838 potent pan-coronavirus fusion inhibitor targeting its spike protein that harbors a high  
839 capacity to mediate membrane fusion. *Cell Research* **30**, 343-355 (2020).

- 840 82. Emsley, P., Lohkamp, B., Scott, W.G. & Cowtan, K. Features and development of Coot.  
841 *Acta Crystallogr D Biol Crystallogr* **66**, 486-501 (2010).  
842 83. Gozalbo-Rovira, R. *et al.* SARS-CoV-2 antibodies, serum inflammatory biomarkers and  
843 clinical severity of hospitalized COVID-19 patients. *J Clin Virol* **131**, 104611 (2020).

#### 844 **Author contributions**

845 PRR: Conceptualization, Methodology, Formal Analysis, Investigation, Visualization, Writing  
846 Original Draft.

847 CFG: Conceptualization, Methodology, Formal Analysis, Writing Original Draft.

848 ACO: Formal Analysis, Review and edit draft.

849 MGL: Formal Analysis, Review and edit draft.

850 SJS: Software, Validation, Review and edit draft.

851 ICM: Methodology, Resources, Review and edit draft.

852 PRH: Investigation, Review and edit draft.

853 MTP: Methodology, Resources, Review and edit draft.

854 MAB: Investigation, Methodology, Review and edit draft.

855 GD: Methodology, Software, Data Curation, Review and edit draft.

856 LLM: Methodology, Project Administration, Review and edit draft.

857 MG: Resources, Review and edit draft.

858 MMA: Resources, Review and edit draft.

859 MDG: Resources, Review and edit draft.

860 JLP: Resources, Review and edit draft.

861 FG: Funding, Project Administration, Supervision, Review and edit draft.  
862 IC: Funding, Project Administration, Supervision, Review and edit draft.  
863 AM: Formal analysis, Writing Original Draft.  
864 RG: Conceptualization, Methodology, Formal Analysis, Writing Original Draft, Supervision,  
865 Funding.  
866 MC: Conceptualization, Methodology, Investigation, Formal Analysis, Writing Original Draft,  
867 Supervision, Funding.

## 868 **List of SeqCOVID consortium members**

869 Iñaki Comas (icomas@ibv.csic.es), Fernando González-Candelas (fernando.gonzalez@uv.es),  
870 Galo A. Goig-Serrano (ggoig@ibv.csic.es), Álvaro Chiner-Oms (achiner@ibv.csic.es), Irving  
871 Cancino-Muñoz (icancino@ibv.csic.es), Mariana Gabriela López (mglopez@ibv.csic.es), Manoli  
872 Torres-Puente (mtorres@ibv.csic.es), Inmaculada Gómez (igomez@ibv.csic.es), Santiago  
873 Jiménez-Serrano (sjimenez@ibv.csic.es), Lidia Ruiz-Roldán (lidiaroldan@gmail.com), María  
874 Alma Bracho (bracho\_alm@gva.es), Neris García-González (neris@uv.es), Llúcia Martínez Priego  
875 (martinez\_lucpri@gva.es), Inmaculada Galán-Vendrell (galan\_inm@gva.es), Paula Ruiz-Hueso  
876 (ruiz\_pau@gva.es), Griselda De Marco (demarco\_gri@gva.es), M<sup>a</sup> Loreto Ferrús Abad  
877 (ferrus\_mlo@gva.es), Sandra Carbó-Ramírez (carbo\_sanram@gva.es ), Mireia Coscollá  
878 (mireia.coscolla@uv.es), Paula Ruiz Rodríguez (ruizro5@alumni.uv.es), Giuseppe D'Auria  
879 (dauria\_giu@gva.es), Francisco Javier Roig Sena (roig\_fco@gva.es), Hermelinda Vanaclocha  
880 Luna (vanaclocha\_her@gva.es), Isabel San Martín Bastida (isanmartin@rjb.csic.es), Daniel  
881 García Souto (danielgarciasouto@gmail.com), Ana Pequeño Valtierra (ana.pequeno@usc.es),  
882 Jose M. C. Tubio (jmctubio@gmail.com), Fco. Javier Temes Rodríguez (fjtemes@gmail.com),  
883 Jorge Rodríguez-Castro (jorge.rodriguez@usc.es), Martín Santamarina García  
884 (martin.santamarina.garcia@usc.es), Nuria Rabella Garcia (nrabella@sanpau.cat), Ferrán

885 Navarro Risueño (fnavarror@santpau.cat), Elisenda Miró Cardona (emiro@santpau.cat),  
886 Manuel Rodríguez-Iglesias (manuel.rodriguez Iglesias@uca.es), Fátima Galán-Sánchez  
887 (fatima.galan@uca.es), Salud Rodríguez-Pallares (salud361@gmail.com), María de Toro  
888 (mthernando@riojasalud.es), María Pilar Bea-Escudero (mpbea@riojasalud.es), José Manuel  
889 Azcona-Gutiérrez (jmazcona@riojasalud.es), Miriam Blasco-Alberdi (mblasco@riojasalud.es),  
890 Alfredo Mayor (alfredo.mayor@isglobal.org), Alberto L. García-Basteiro (alberto.garcia-  
891 basteiro@isglobal.org), Gemma Moncunill (gemma.moncunill@isglobal.org), Carlota Dobaño  
892 (carlota.dobano@isglobal.org), Pau Cisteró (pau.cistero@isglobal.org), Oriol Mitjà  
893 (omitja@flsida.org), Camila González-Beiras (cgonzalez@flsida.org), Martí Vall-Mayans  
894 (mvall@flsida.org), Marc Corbacho-Monné (mcorbacho@flsida.org), Andrea Alemany  
895 (ealemany@gmail.com), Darío García de Viedma (dgviedma2@gmail.com), Laura Pérez-Lago  
896 (lperezg00@gmail.com), Marta Herranz (m\_herranz01@hotmail.com), Jon Sicilia  
897 (jsiciliamambrilla@gmail.com), Pilar Catalán (pcatalan.hgugm@salud.madrid.org), Julia Suárez  
898 (julia.suarez@iisgm.com), Patricia Muñoz (pmunoz@hggm.es), Cristina Muñoz-Cuevas  
899 (cristina.munozc@salud-juntaex.es), Guadalupe Rodríguez Rodríguez  
900 (guadalupe.rodriguez@salud-juntaex.es), Juan Alberola Enguñados (juan.alberola@uv.es), Jose  
901 Miguel Nogueira Coito (Jose.M.Nogueira@uv.es), Juan José Camarena Miñana  
902 (juan.camarena@uv.es), Antonio Rezusta López (arezusta@unizar.es), Alexander Tristancho  
903 Baró (aitristancho@salud.aragon.es), Ana Milagro Beamonte (amilagro@salud.aragon.es),  
904 Nieves Martínez Cameo (nmcameo@gmail.com), Yolanda Gracia Grataloup  
905 (ygrataloup@yahoo.es), Elisa Martró (emartro@igtp.cat), Antoni E. Bordoy (aescalas@igtp.cat),  
906 Anna Not (anot@igtp.cat), Adrián Antuori (adrian.antuori@gmail.com), Anabel Fernández  
907 (afernandezn.ics@gencat.cat), Nona Romaní (nonaromani@gmail.com), Rafael Benito Ruesca  
908 (rbenito@unizar.es), Sonia Algarate Cajo (sonialgarate@gmail.com), Jessica Bueno Sancho  
909 (jbuenosan@salud.aragon.es), Jose Luis del Pozo (jdelpozo@unav.es), Jose Antonio Boga Riveiro  
910 (joseantonio.boga@sespa.es), Cristián Castelló Abietar (crcaab@hotmail.com), Susana Rojo

911 Alba (ssnrj4@gmail.com), Marta Elena Álvarez Argüelles (martaealvarez@gmail.com), Santiago  
912 Melón García (santiago.melon@sespa.es), Maitane Aranzamendi Zaldumbide  
913 (maitane.aranzamendizaldumbide@osakidetza.eus), Óscar Martínez Expósito  
914 ("OSCAR.MARTINEZEXPOSITO@osakidetza.eus"), Mikel Gallego Rodrigo  
915 ("MIKEL.GALLEGORODRIGO@osakidetza.eus"), Maialen Larrea Ayo  
916 ("MAIALEN.LARREAYO@osakidetza.eus"), Nerea Antona Urieta  
917 ("NEREA.ANTONAURIETA@osakidetza.eus"), Andrea Vergara Gómez (vergara@clinic.cat),  
918 Miguel J Martínez Yoldi (myoldi@clinic.cat), Jordi Vila Estapé (jvila@clinic.cat), Elisa Rubio García  
919 (elrubio@clinic.cat), Aida Peiró-Mestres (aida.peiro@isglobal.org), Jessica Navero-Castillejos  
920 (jessica.navero@isglobal.org), David Posada (dposada@uvigo.es), Diana Valverde  
921 (dianaval@uvigo.es), Nuria Estévez (nuestevez@uvigo.es), Iria Fernández-Silva  
922 (irfernandez@uvigo.es), Loretta de Chiara (Ldechiara@uvigo.es), Pilar Gallego  
923 (mgallego@alumnos.uvigo.es), Nair Varela (nvarela@alumnos.uvigo.es), Rosario Moreno  
924 Muñoz (moreno\_rosmuny@gva.es), M<sup>a</sup> Dolores Tirado Balaguer (tirado\_dolbal@gva.es), Ulises  
925 Gómez-Pinedo (ulisesalfonso.gomez@salud.madrid.org), Mónica Gozalo Margüello  
926 (monica.gozalo@scsalud.es), M<sup>a</sup> Eliecer Cano García (meliecer.cano@scsalud.es), José Manuel  
927 Méndez Legaza (josemanuel.mendez@scsalud.es), Jesús Rodríguez Lozano  
928 (jesus.rodriguez@scsalud.es), María Siller Ruiz (maria.siller@scsalud.es), Daniel Pablo Marcos  
929 (daniel.pablo@scsalud.es), Antonio Oliver (antonio.oliver@ssib.es), Jordi Reina  
930 (jorge.reina@ssib.es), Carla López-Causapé (carla.lopez@ssib.es), Andrés Canut Blasco  
931 (andres.canutblasco@osakidetza.eus), Silvia Hernáez Crespo  
932 (silvia.hernaezcrespo@osakidetza.eus), M<sup>a</sup> Luz Cordon Rodríguez  
933 (marialuzalbina.cordonrodriguez@osakidetza.eus), M<sup>a</sup> Concepción Lecaroz Agara  
934 (mariaconcepcion.lecarozagara@osakidetza.eus), Carmen Gómez González  
935 (carmen.gomezgonzalez@osakidetza.eus), Amaia Aguirre Quiñonero  
936 (amaia.aguirrequiñonero@osakidetza.eus), José Israel López Mirones

937 (joseisrael.lopezmirones@osakidetza.eus), Marina Fernández Torres

938 (marina.fernandeztorres@osakidetza.eus), M<sup>a</sup> Rosario Almela Ferrer

939 (mariadelrosario.almelaerrer@osakidetza.eus ), José Antonio Lepe Jiménez

940 (josea.lepe.sspa@juntadeandalucia.es), Verónica González Galán

941 (veronica.gonzalez.galan.sspa@juntadeandalucia.es), Ángel Rodríguez Villodres

942 (angel.rodriguez.villodres.sspa@juntadeandalucia.es), Nieves Gonzalo Jiménez

943 (gonzalo\_nie@gva.es), M<sup>a</sup> Montserrat Ruiz García (ruiz\_mongar@gva.es), Antonio Galiana

944 Cabrera (antoniogaliana1@gmail.com), Judith Sánchez-Almendro (judhsa@gmail.com), Gustavo

945 Cilla Eguiluz (CARLOSGUSTAVOSANTIAGO.CILLAEGUILUZ@osakidetza.eus), Milagrosa Montes

946 Ros (MARIAMILAGROSA.MONTESROS@osakidetza.eus), Luis Piñeiro Vázquez

947 (LUISDARIO.PINEIROVAZQUEZ@osakidetza.eus), Ane Sorrain

948 (ane.sorarrain@biodonostia.org), José María Marimón Ortiz de Zarate

949 (JOSEMARIA.MARIMONORTIZDEZ@osakidetza.eus), M<sup>a</sup> Dolores Gómez Ruiz,

950 (gomez.mdo@gmail.com), Eva González Barberá (gonzalez\_evabar@gva.es), José Luis López

951 Hontangas (lopez\_jlu@gva.es), José María Navarro-Marí

952 (josem.navarro.sspa@juntadeandalucia.es), Irene Pedrosa Corral

953 (irene.pedrosa.sspa@juntadeandalucia.es), Sara Sanbonmatsu Gámez

954 (saral.sanbonmatsu.sspa@juntadeandalucia.es), M. Carmen Perez Gonzalez

955 (mcpergon@gobiernodecanarias.org), Francisco Javier Chamizo López

956 (fchalop@gobiernodecanarias.org), Ana Bordes Benítez (aborben@gobiernodecanarias.org),

957 David Navarro Ortega (david.navarro@uv.es), Eliseo Albert Vicent (eliseo.al.vi@gmail.com),

958 Ignacio Torres (nachotfink@gmail.com), M<sup>a</sup> Isabel Gascón Ros (gascon\_isa@gva.es), Cristina

959 Torregrosa Hetland (cjtoregrosahetland@hotmail.com), Eva Pastor Boix (pastor\_eva@gva.es),

960 Paloma Cascales Ramos (cascales\_pal@gva.es), Begoña Fuster Escrivá

961 (begona.fuster@gmail.com), Concepción Gimeno Cardona (concepcion.gimeno@uv.es), María

962 Dolores Ocete Mochón (ocete\_mar@gva.es), Rafael Medina González

963 (rafa.medina.gonzalez@gmail.com), Julia González Cantó (juliagonzalez1992@hotmail.com),  
964 Olalla Martínez Macias (martinez\_ola@gva.es), Begoña Palop Borrás (bpalop@hotmail.com),  
965 Inmaculada de Toro Peinado (inmadetoro@yahoo.es), M<sup>a</sup> Concepción Mediavilla Gradolph  
966 (gradolphilla@hotmail.com), Mercedes Pérez Ruiz  
967 (mercedes.perez.ruiz.sspa@juntadeandalucia.es), Oscar González-Recio  
968 (gonzalez.oscar@inia.es), Mónica Gutiérrez-Rivas (mgrivas9@gmail.com), Encarnación Simarro  
969 Córdoba (mesimarro@sescam.jccm.es), Julia Lozano Serra (jlozanos@sescam.jccm.es), Lorena  
970 Robles Fonseca (lrobles@sescam.jccm.es), Adolfo de Salazar (adolsalazar@gmail.com), Laura  
971 Viñuela (lauravinuelagon@gmail.com), Natalia Chueca (naisses@yahoo.es), Federico García  
972 (fegarcia@ugr.es), Cristina Gomez-Camarasa (gomezcamarasa@gmail.com), Ana Carvajal  
973 (ana.carvajal@unileon.es), Vicente Martín (vicente.martin@unileon.es), Juan Fregeneda  
974 (juan.fregeneda@unileon.es), Antonio J. Molina (ajmolt@unileon.es), Héctor Arguello  
975 (hector.arguello@unileon.es), Tania Fernandez-Villa (tferv@unileon.es), Amparo Farga Martí  
976 (farga\_amp@gva.es), Rocío Falcón (falcon\_roc@gva.es), Victoria Domínguez Márquez  
977 (m.victoria.dominguez@uv.es), José Javier Costa Alcalde (jose.javier.costa.alcalde@sergas.es),  
978 Rocío Trastoy Pena (rocio.trastoy.pena@sergas.es), Gema Barbeito Castiñeiras  
979 (gema.barbeito.castineiras@sergas.es), Amparo Coira Nieto (amparo.coira.nieto@sergas.es),  
980 María Luisa Pérez del Molino Bernal (maria.luisa.perez.del.molino.bernal@sergas.es), Antonio  
981 Aguilera (antonio.aguilera.guirao@sergas.es), Anna M. Planas (anna.planas@iibb.csic.es), Álex  
982 Soriano (asoriano@clinic.cat), Israel Fernández-Cádenas (israelcadenas@yahoo.es), Jordi Pérez-  
983 Tur (jpereztur@ibv.csic.es), M<sup>a</sup> Ángeles Marcos Maeso (mmarcos@clinic.cat), Carmen Ezpeleta  
984 Baquedano (cezpeleb@navarra.es), Ana Navascués Ortega (ana.navascues.ortega@navarra.es),  
985 Ana Miqueleiz Zapatero (ana.miqueleiz.zapatero@navarra.es), Manuel Segovia Hernández  
986 (msegovia@um.es), Antonio Moreno Docón (a.moreno@um.es), Esther Viedma Moreno  
987 (ester.viedma@salud.madrid.org), Jesús Mingorance (jesus.mingorance@idipaz.es), Juan Carlos  
988 Galán Montemayor (juancarlos.galan@salud.madrid.org), Iván Sanz Muñoz



989 (isanzm@saludcastillayleon.es), Diana Pérez San José (dianaperezsj@gmail.com), Maria Gil  
990 Fortuño (gil\_marfor@gva.es), Juan B. Bellido Blasco (bellido\_jua@gva.es), Alberto Yagüe Muñoz  
991 (yague\_alb@gva.es), Noelia Henández Pérez (hernandez\_noeper@gva.es), Helena Buj Jordá  
992 (helenitabuj@hotmail.com), Óscar Pérez Olaso (perez\_oscola@gva.es), Alejandro González  
993 Praetorius (agonzalezp@sescam.jccm.es), Aida Esperanza Ramírez Marinero  
994 (aramirezm@lrc.cat), Eduardo Padilla León (epadillal@lrc.cat), Alba Vilas Basil (avilasb@lrc.cat),  
995 Mireia Canal Aranda (mcanala@lrc.cat), Albert Bernet Sánchez (abernet.lleida.ics@gencat.cat),  
996 Alba Bellés Bellés (abelles.lleida.ics@gencat.cat), Eric López González  
997 (elopezg.lleida.ics@gencat.cat), Iván Prats Sánchez (iprats@gss.cat), Mercè García González  
998 (mgarciag.lleida.ics@gencat.cat), Miguel Martínez Lirola  
999 (miguelj.martinez.lirola.sspa@juntadeandalucia.es), Maripaz Ventero Martín  
1000 (ventero\_marmar@gva.es), Carmen Molina Pardines (molina\_carpar@gva.es), Nieves Orta Mira  
1001 (orta\_nie@gva.es), María Navarro Cots (navarro\_dia@gva.es), Inmaculada Vidal Catalá  
1002 (vidal\_inm@gva.es), Isabel García Nava (garcianava@hotmail.com), Soledad Illescas Fernández-  
1003 Bermejo (msillescasf@sescam.jccm.es), José Martínez-Alarcón (jmalarcon@sescam.jccm.es),  
1004 Marta Torres-Narbona (mtorresn@sescam.jccm.es), Cristina Colmenarejo  
1005 (ccolmenarejo@sescam.jccm.es), Lidia García-Agudo (lgagudo@sescam.jccm.es), Jorge Alfredo  
1006 Pérez García (jorgep@sescam.jccm.es), Martín Yago López (yago\_mar@gva.es), María Ángeles  
1007 Goberna Bravo (mariangoberna@gmail.com), Carolina Pla Cortes (caly.cortes@gmail.com),  
1008 Noelia Lozano Rodríguez (lozano\_noe@gva.es), Nieves Aparici Valero (aparici\_nie@gva.es),  
1009 Sandra Moreno Marro (moreno\_sanmar@gva.es), Agustín Irazo Tatay (iranzo\_agu@gva.es),  
1010 Isabel Mariscal Pieper (mariscal\_isa@gva.es), M<sup>a</sup> Pilar Ramos (ramos\_marrei@gva.es), Mónica  
1011 Parra Grande (parra\_mongra@gva.es), Bárbara Gómez Alonso (gomez\_baralo@gva.es),  
1012 Francisco José Arjona Zaragoza (arjona\_fra@gva.es), Amparo Broseta Tamarit  
1013 (amparo2400@gmail.com), Juan José Badiola Díez (badiola@unizar.es), Alicia Otero García  
1014 (aliciaogar@unizar.es), Eloísa Sevilla Romeo (esevillr@unizar.es), Belén Marín González

1015 (belenm@unizar.es), Mirta García Martínez (gmmirta@hotmail.com), Marina Betancor Caro  
1016 (mbetancorcaro@gmail.com ), Diego Sola Fraca (diegosola95@gmail.com), Sonia Pérez Lázaro  
1017 (soniperez97@gmail.com), Eva Monleón Moscardó (emonleon@unizar.es ), Marta Monzón  
1018 Garcés (mmonzon@unizar.es), Cristina Acín Tresaco (crisacin@unizar.es), Rosa Bolea Bailo  
1019 (rbolea@unizar.es), Bernardino Moreno Burgos (bmoreno@unizar.es), Amparo Broseta Tamarit  
1020 (abroseta@hospitalmanises.es), Carlos Gulin Blanco (cgulin@hospitalmanises.es)

## 1021 **Supplementary Material**

1022 **Supplementary video 1.** Geographical transmission of B.1.177.637 visualized with Nextstrain  
1023 build.

## 1024 **Supplementary Tables**

1025 **Supplementary table 1.** Accession numbers for analysed sarbecoviruses.

1026 **Supplementary table 2.** Defining SNPs for B.1.177.637, B.1.177.637.V2, and VOI1163.654.

1027 **Supplementary table 3.** Accession numbers of sequences of interest for mutated amino acids  
1028 484, 501, 1163 and 1167 of the S protein.

1029 **Supplementary table 4.** Accession numbers of 5,017 Spanish sequences from SeqCOVID-SPAIN  
1030 consortium.

1031 **Supplementary table 5.** Accession numbers of 270,869 analysed sequences.

1032 **Supplementary table 6.** Accession numbers of 10,450 analysed sequences.

1033 **Supplementary table 7.** Accession numbers of 3,067 analysed sequences belonging to  
1034 20I/501Y.V1.

1035 **Supplementary table 8.** Primers for site directed mutagenesis of plasmid encoding codon-  
1036 optimized S protein.

1037 **Supplementary table 9.** Primers for sanger sequencing to detect mutations of interest.

### 1038 **Supplementary Figures**

1039 **Supplementary Figure 1. Temporal distribution of mutated samples coloured by region. a.**  
1040 Distribution of S protein amino acid replacement D1163Y over the pandemic (N=1874). **b.**  
1041 Distribution of S protein amino acid replacement G1167V over time (N=1708).

1042 **Supplementary Figure 2. Maximum-likelihood phylogenies for different PANGO lineages. a.**  
1043 Complete phylogeny coloured by the PANGO lineages. **b.** Phylogeny of B.53 lineage. The circle  
1044 represents sequences with D1163 amino acid replacement. **c.** Phylogeny of B.53 lineage. The  
1045 inner circle represents sequences with D1163 amino acid replacements, and the external circle  
1046 represents sequences with G1167 amino acid replacements. **d.** Phylogeny of A lineage. The circle  
1047 represents sequences with D1163 amino acid replacements. **e.** Phylogeny of B.1 and derived  
1048 lineages. The inner circle represents sequences with D1163 amino acid replacements, and the  
1049 external circle represents sequences with G1167 amino acid replacements. **f.** Phylogeny of B.1.1  
1050 and derivative D.1 lineages. The inner circle represents sequences with D1163 amino acid  
1051 replacements, and the external circle represents sequences with G1167 amino acid  
1052 replacements. **g.** Phylogeny of B.1.177 and B.1.177.637 lineages. The inner circle represents  
1053 sequences with D1163 amino acid replacements, and the external circle represents sequences  
1054 with G1167 amino acid replacements. The scale bar of each indicates the number of nucleotide  
1055 substitutions per site. The legend of positions 1163 and 1167 is common for all represented  
1056 panels.

1057 **Supplementary Figure 3. Whole genome mutated positions in genotypes with changes 1163Y**  
1058 **and 1167V of the S protein.** B.1.177.637 is coloured in magenta and cluster 1163.654 is coloured

1059 in orange. Other less frequent genotypes (found in at least 20 sequences) that include changes  
1060 in S position 1163 and/or 1167 are coloured in turquoise. Cluster 1163.654 is coloured in navy  
1061 blue. Line width is proportional to the frequency of the genotype. Sites 1163 and 1167 in the S  
1062 protein are indicated by magenta star symbols, and position 484 in S, whose mutations are  
1063 associated with antigenicity changes, is indicated by a navy blue star.

1064 **Supplementary Figure 4. Maximum-likelihood phylogeny of 3,067 genomes belonging to**  
1065 **20I/501Y.V1, rooted with Wuhan reference sequence.** Mutated sequences with 1163 and/or  
1066 1167 amino acids of the S protein are coloured in the circle. The scale bar indicates the number  
1067 of nucleotide substitutions per site. The biggest clades are collapsed with isosceles triangles.

1068 **Supplementary Figure 5. Maximum-likelihood phylogeny of 3,266 SARS-CoV-2 genomes**  
1069 **representing 20E clade rooted with Wuhan reference sequence.** Sequences from B.1.177.637  
1070 are coloured in magenta, sequences not identified as B.1.177.637 are coloured in green, and  
1071 cluster B.1.177.637.V2 (S protein amino acid replacements: A222V, D614G, E484K, D1163Y, and  
1072 141-144Del) is coloured in blue. The scale bar indicates the number of nucleotide substitutions  
1073 per site. The biggest clades are collapsed, represented as isosceles triangles.

1074 **Supplementary Figure 6. Neutralization of the different mutated S protein variants by**  
1075 **convalescent sera from six individuals infected during the first epidemic wave.** The reciprocal  
1076 titer at which each of the different convalescent sera neutralizes the different variants by 50%  
1077 is indicated. Plotted are the mean and standard error of (n=3).

**a**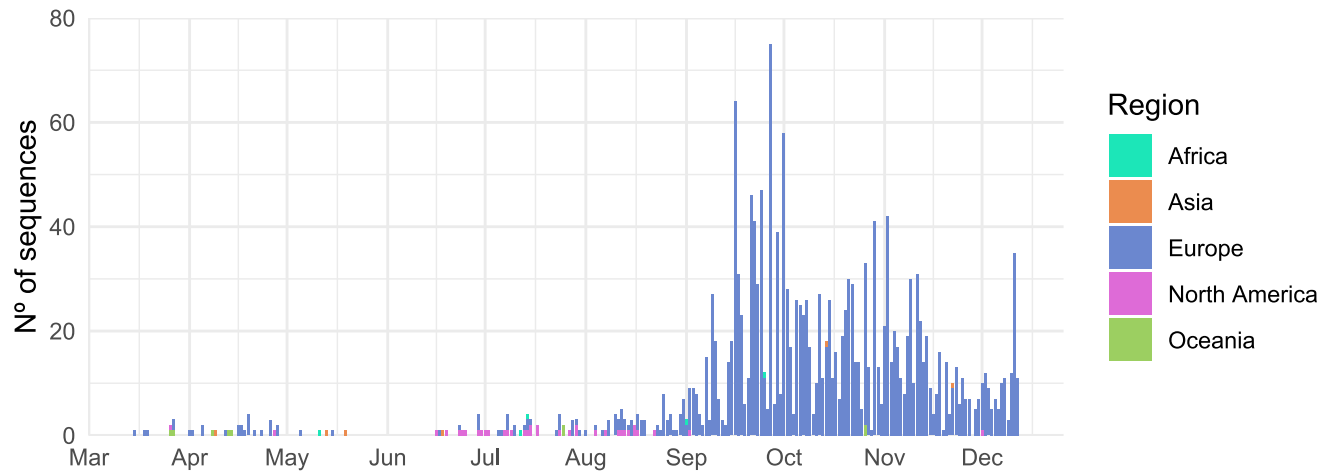**b**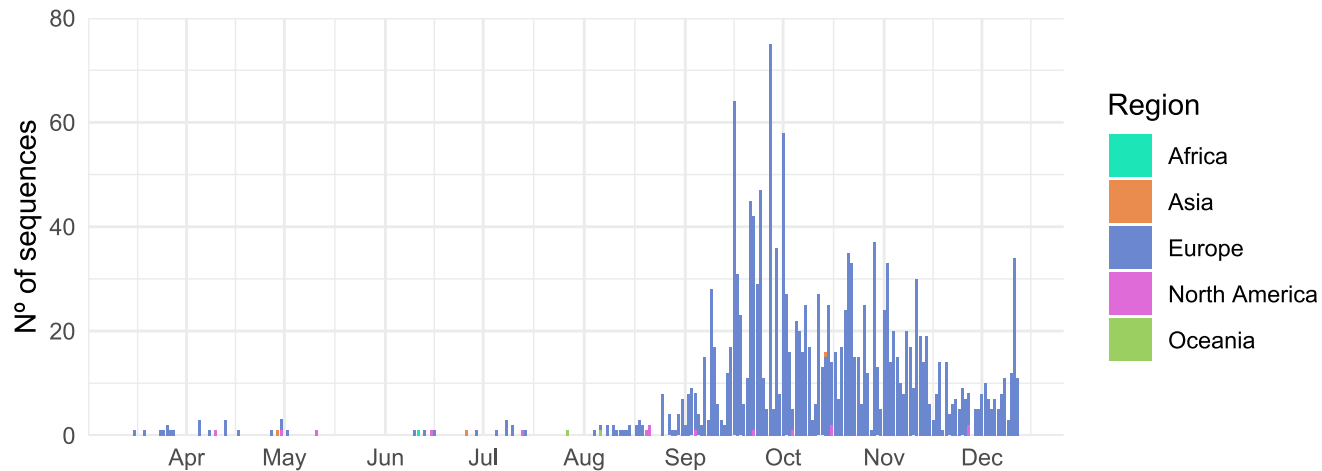



c

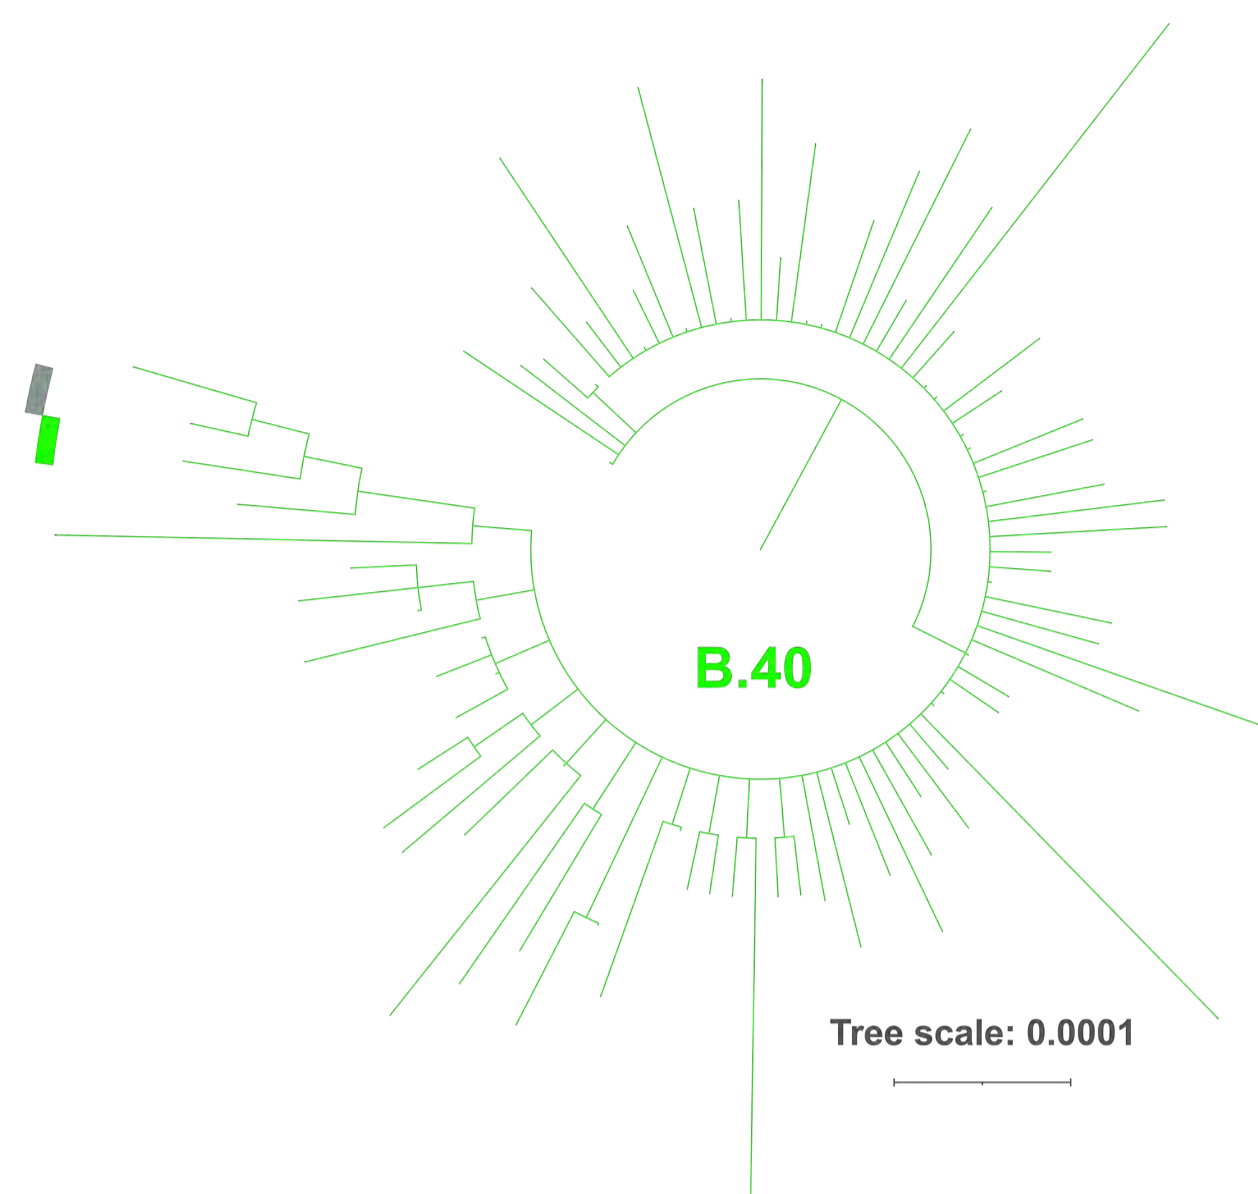

d

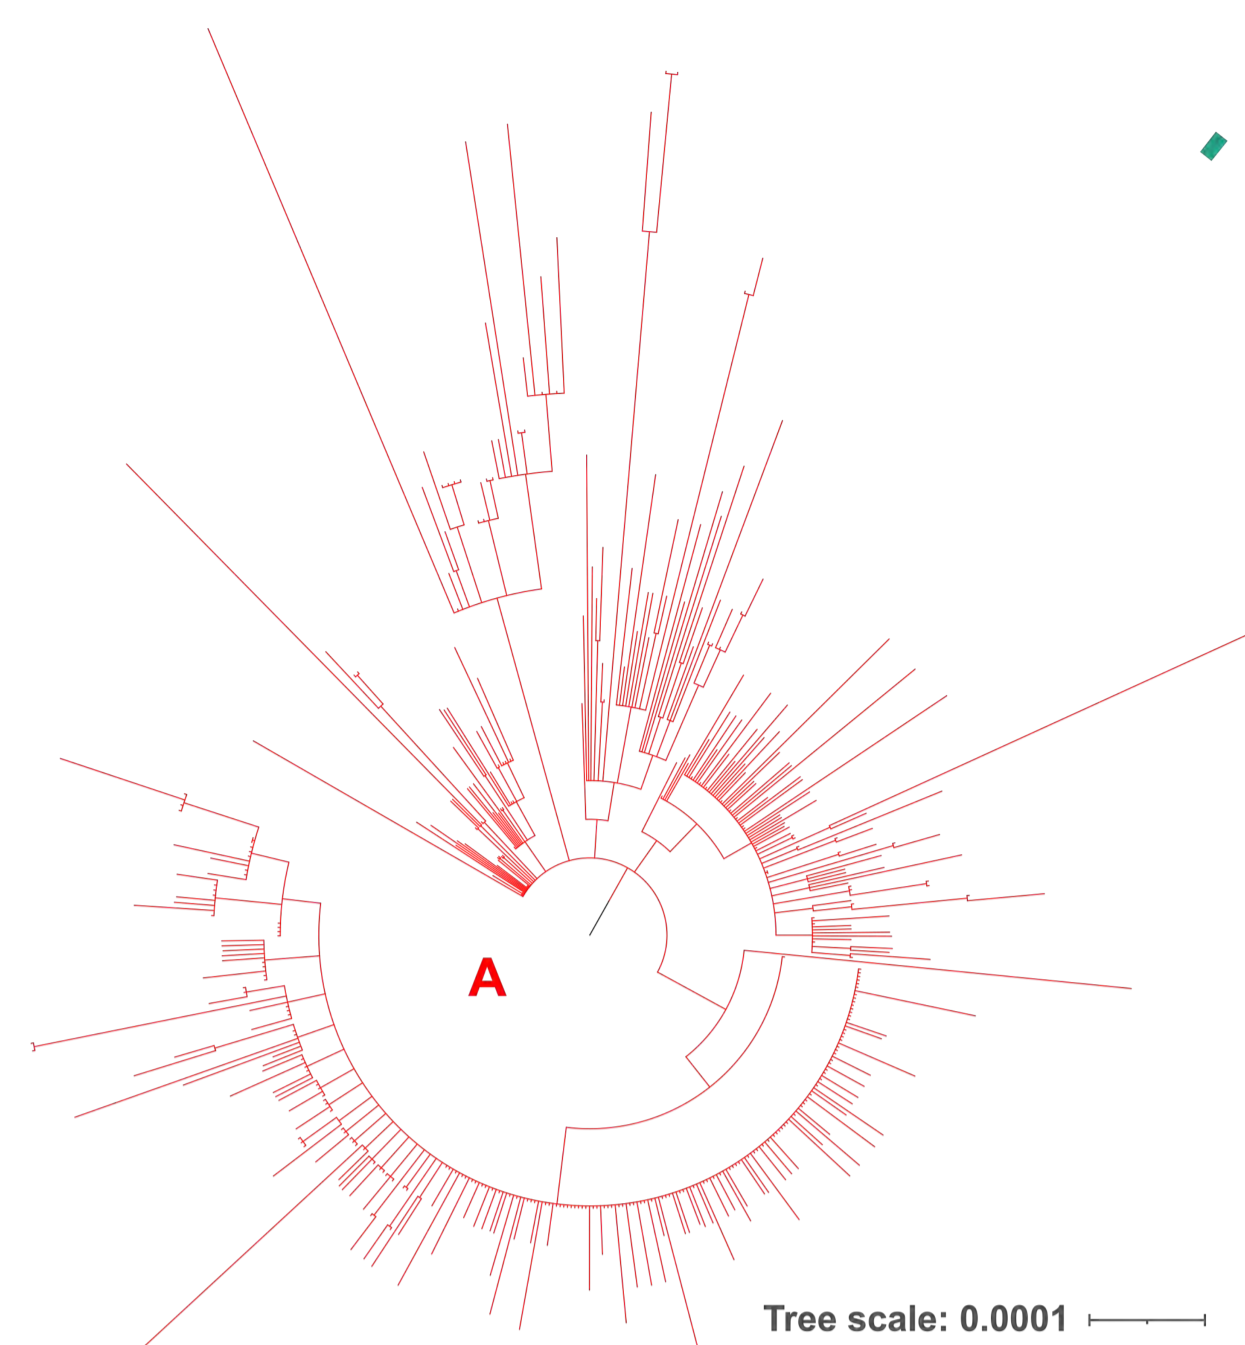

b

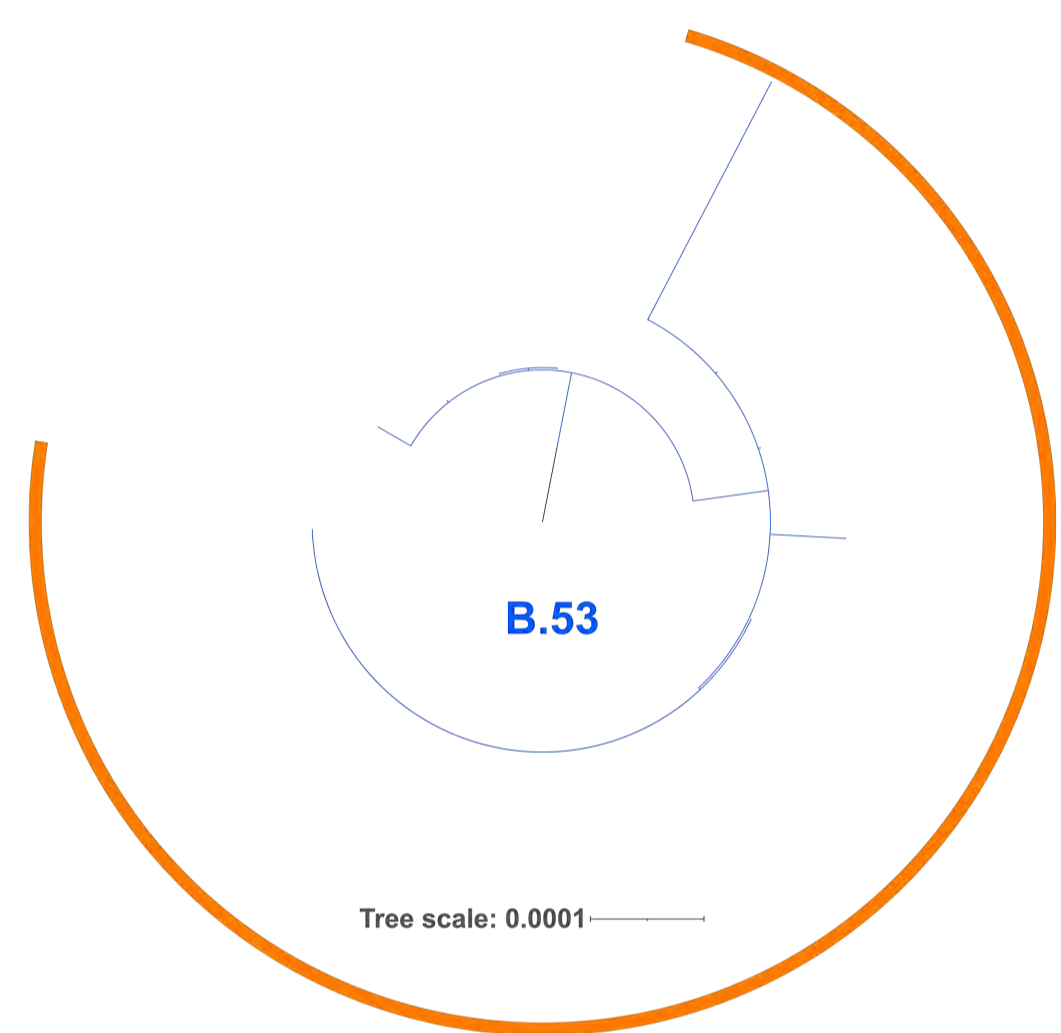

a

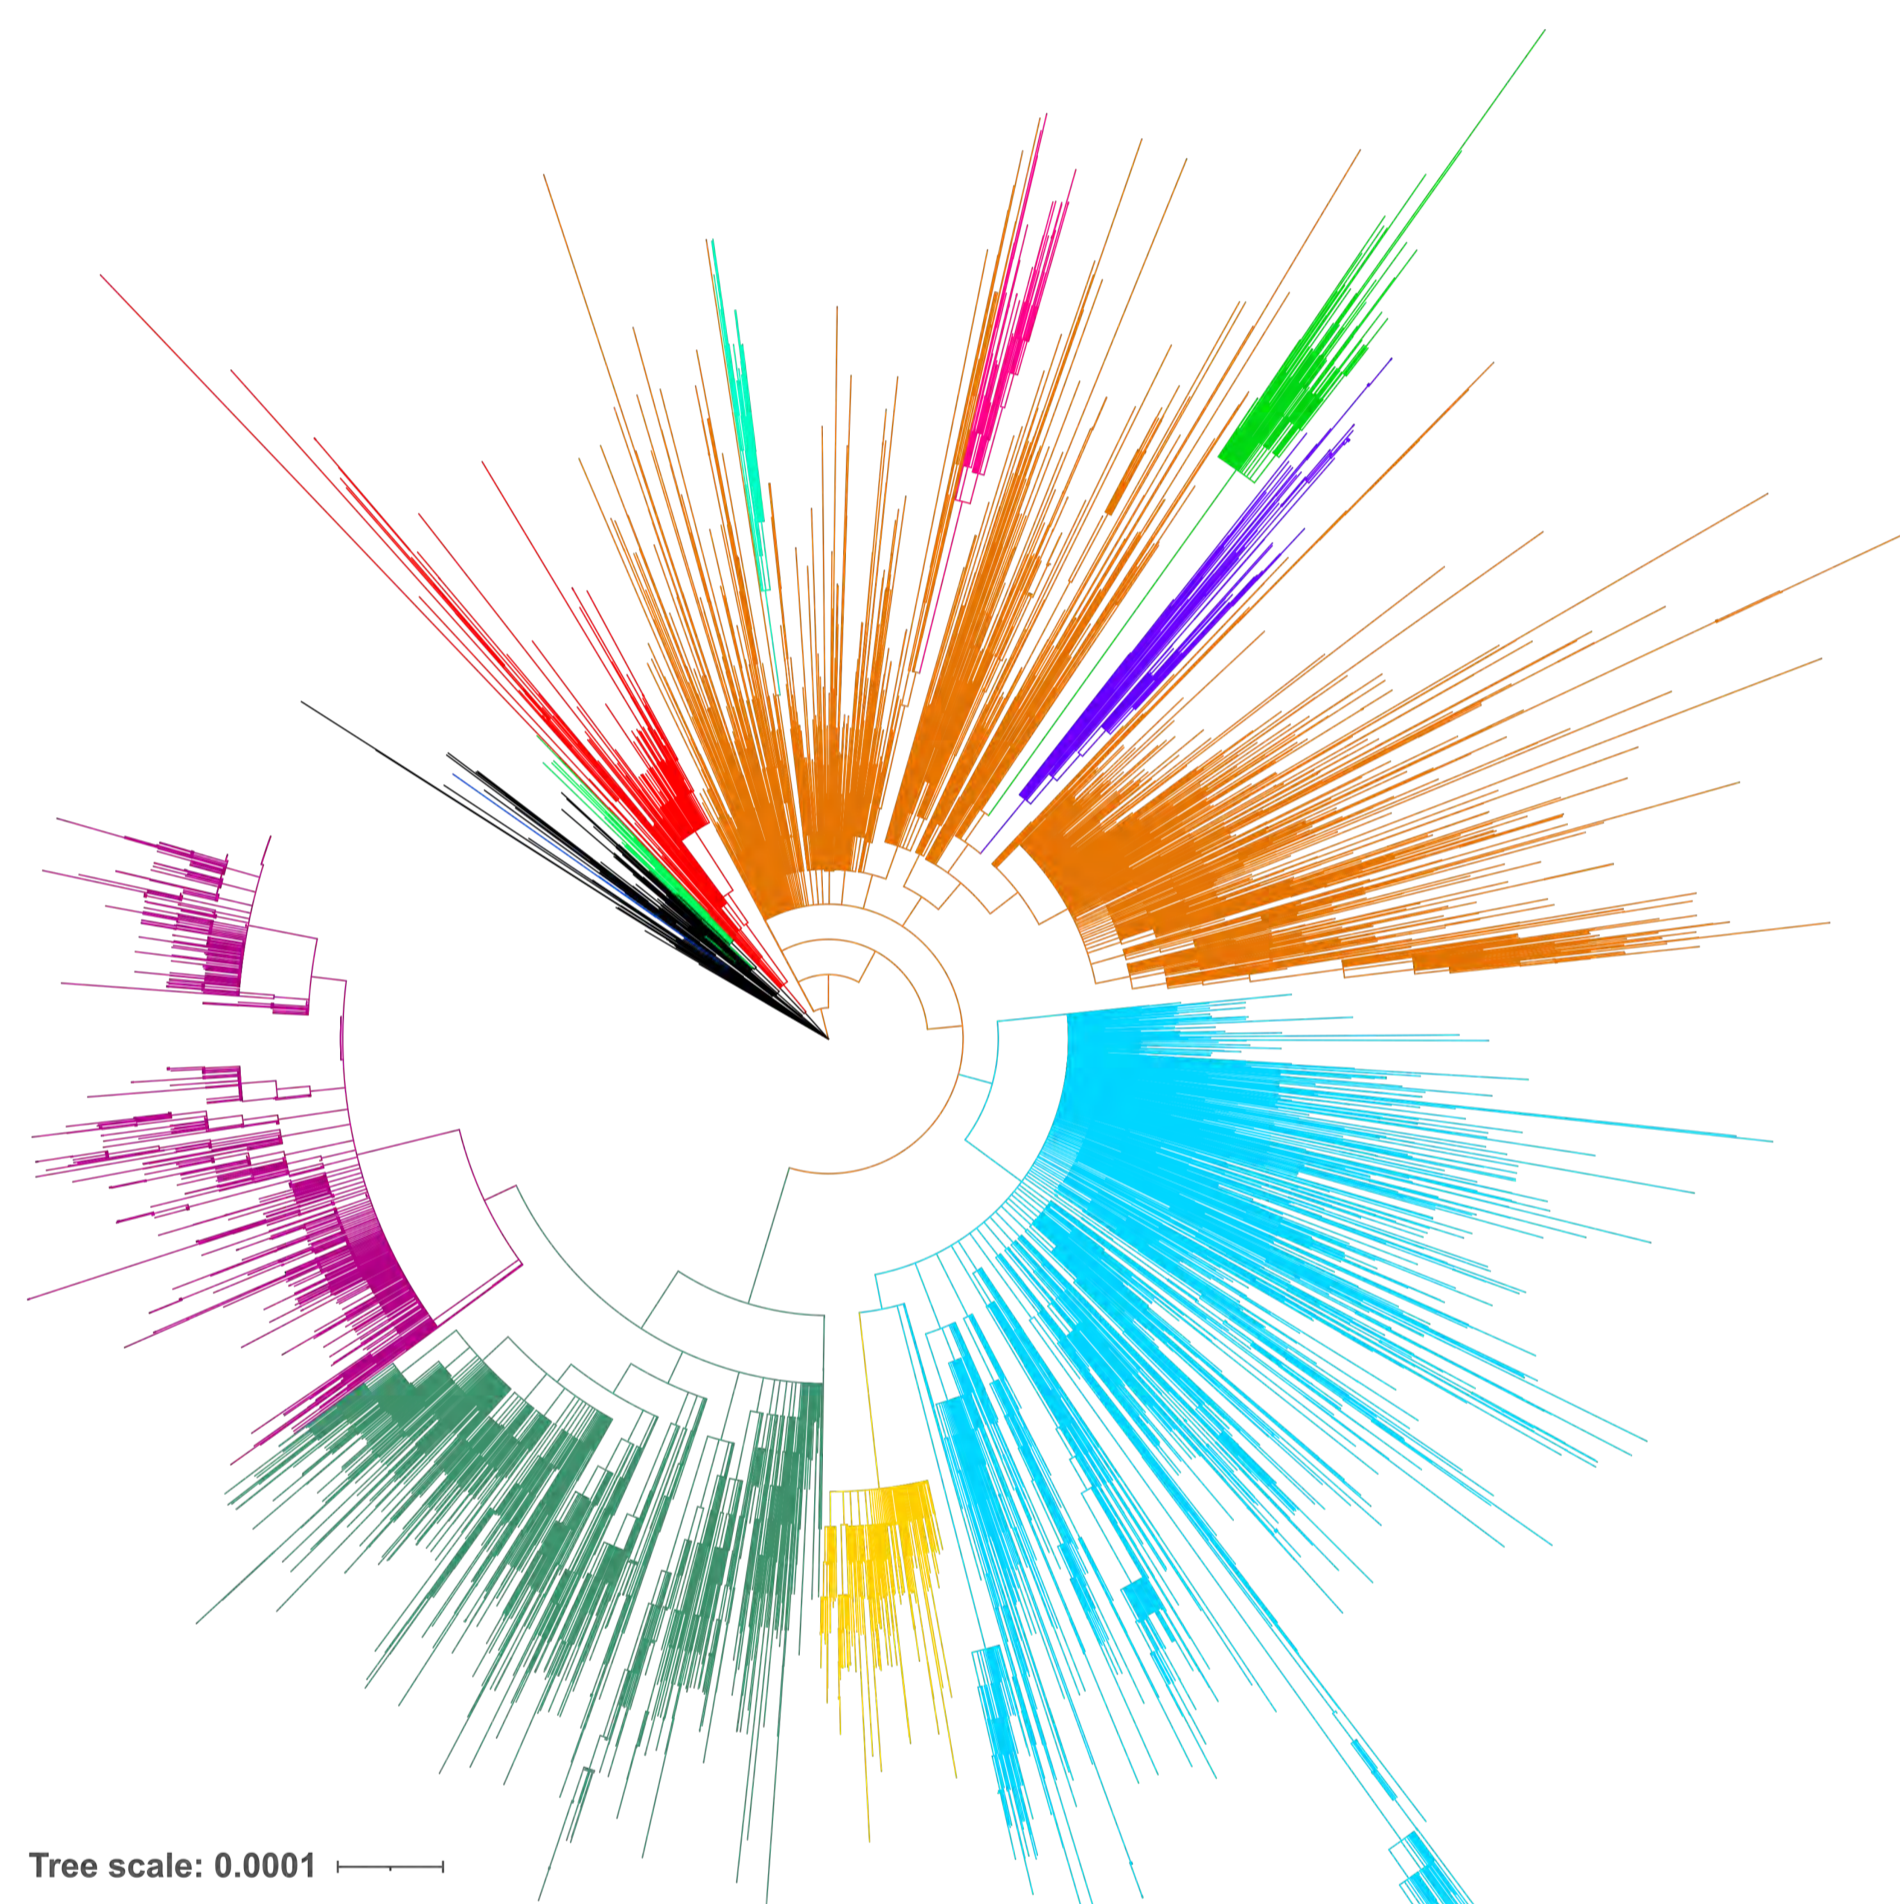

e

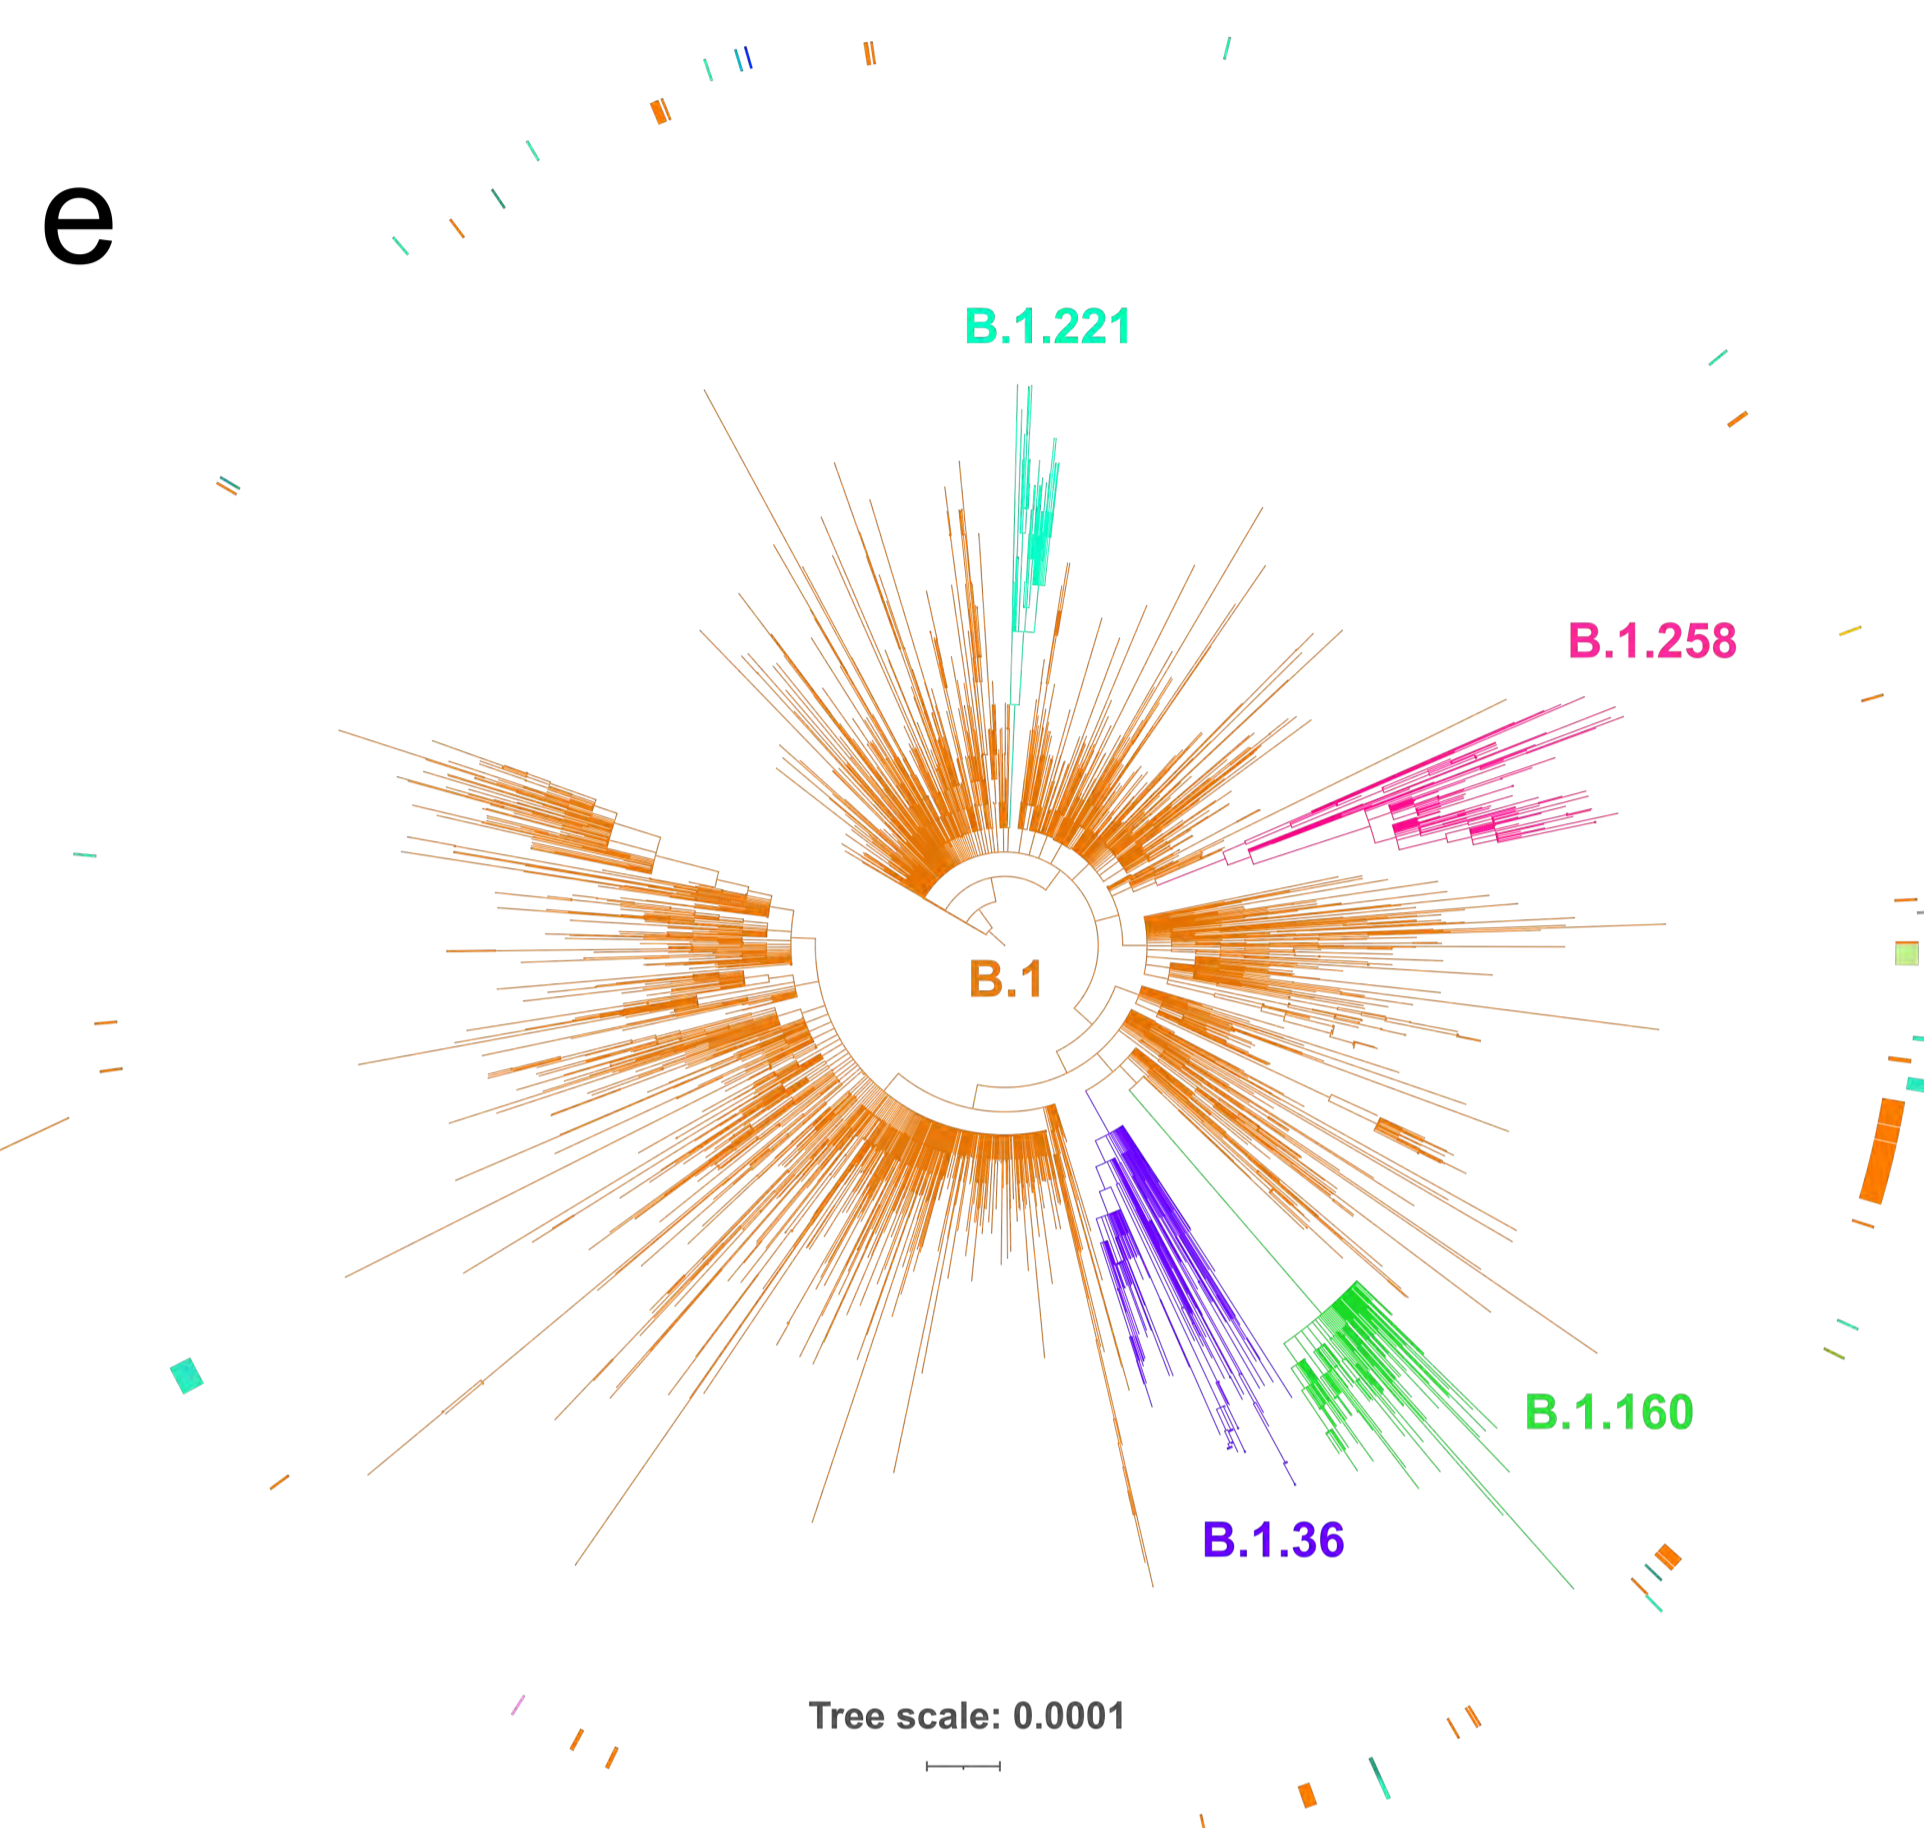

g

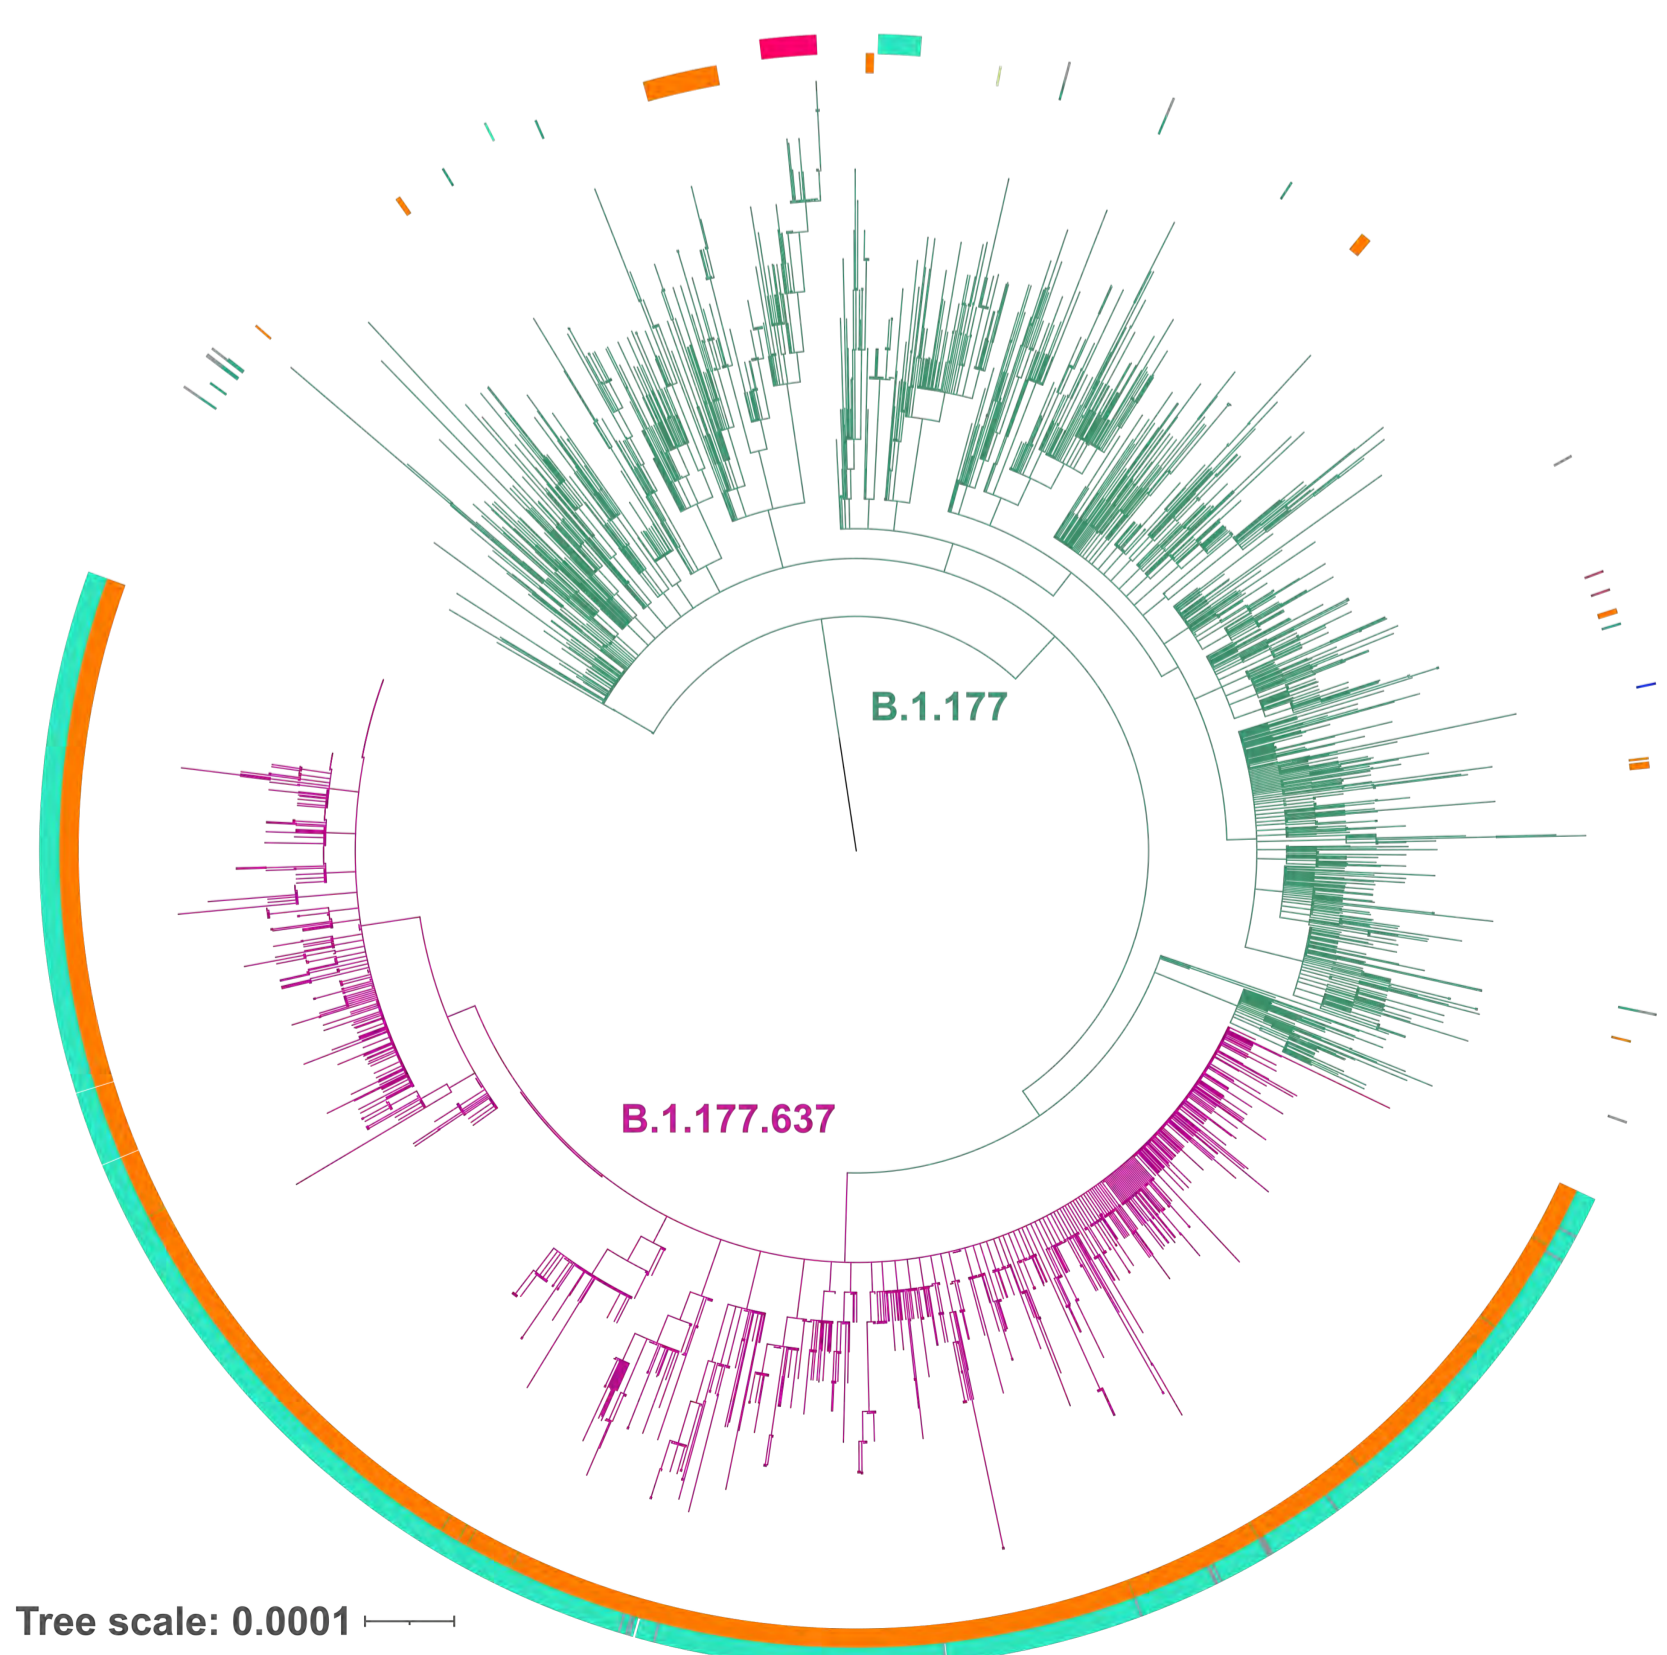

| Position D1163 | Position G1167 |
|----------------|----------------|
| 1163A          | 1167A          |
| 1163E/D        | 1167C/G        |
| 1163G          | 1167D          |
| 1163H          | 1167F          |
| 1163Y/D        | 1167R          |
| 1163H/Y/D      | 1167R/G        |
| 1163N/D        | 1167S          |
| 1163V          | 1167S/G        |
| 1163Y          | 1167V          |
|                | 1167V/G        |

f

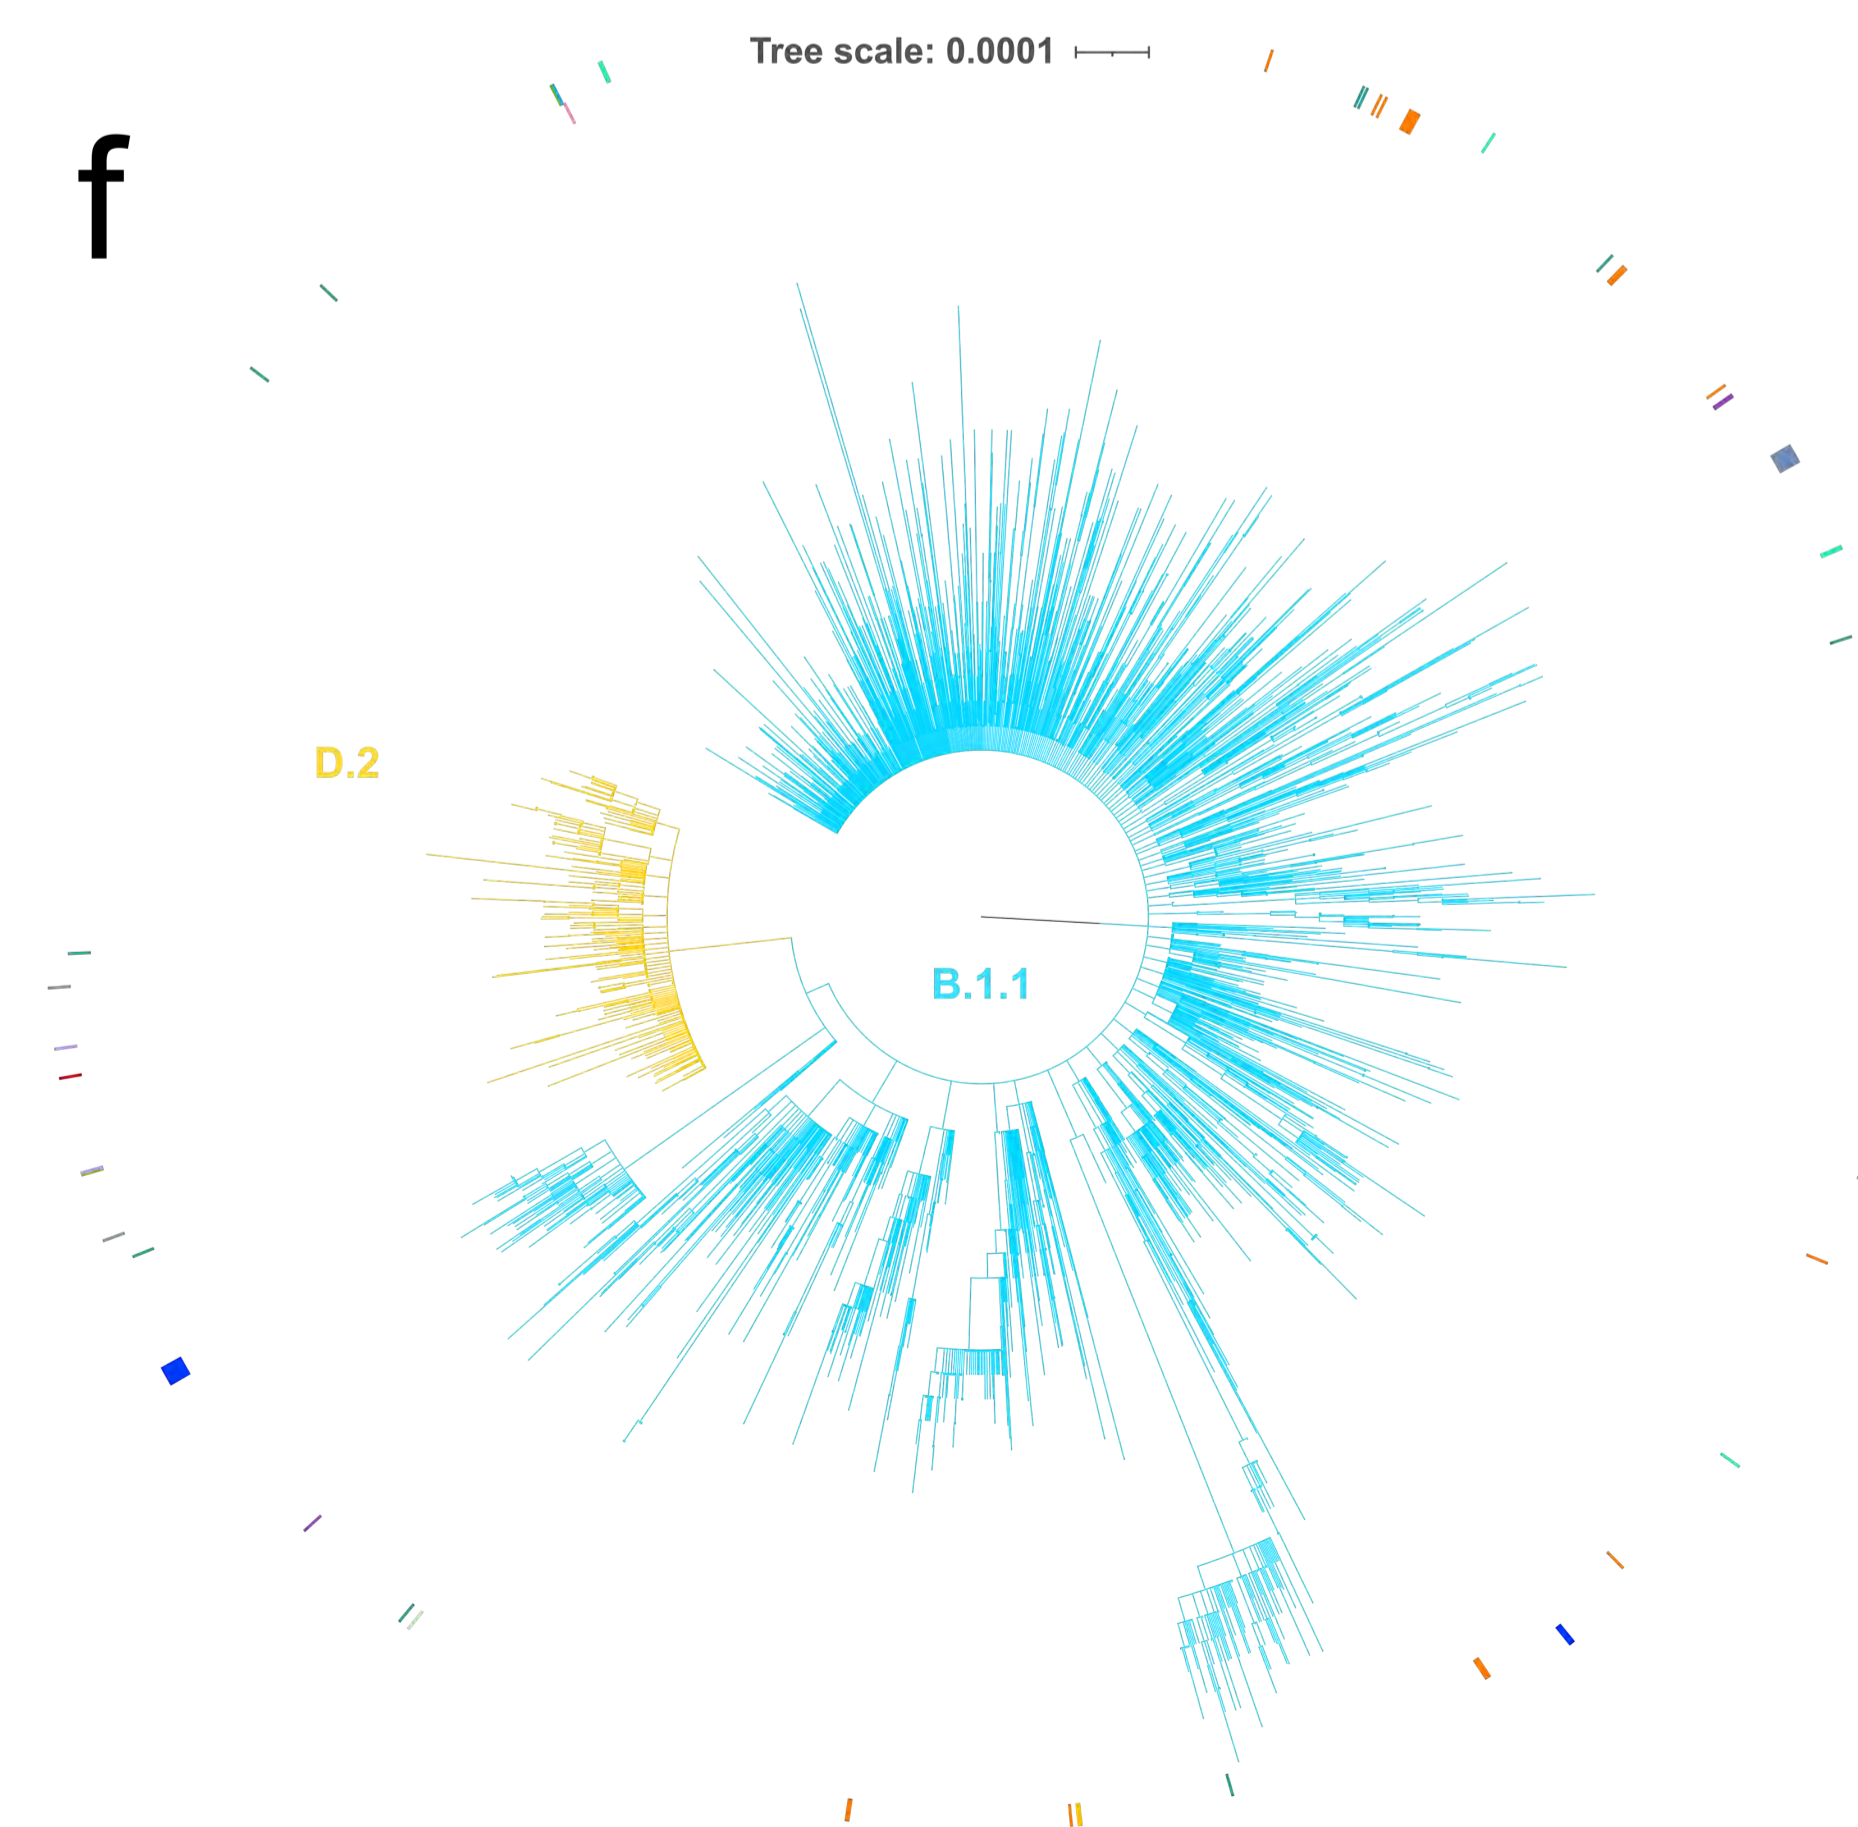



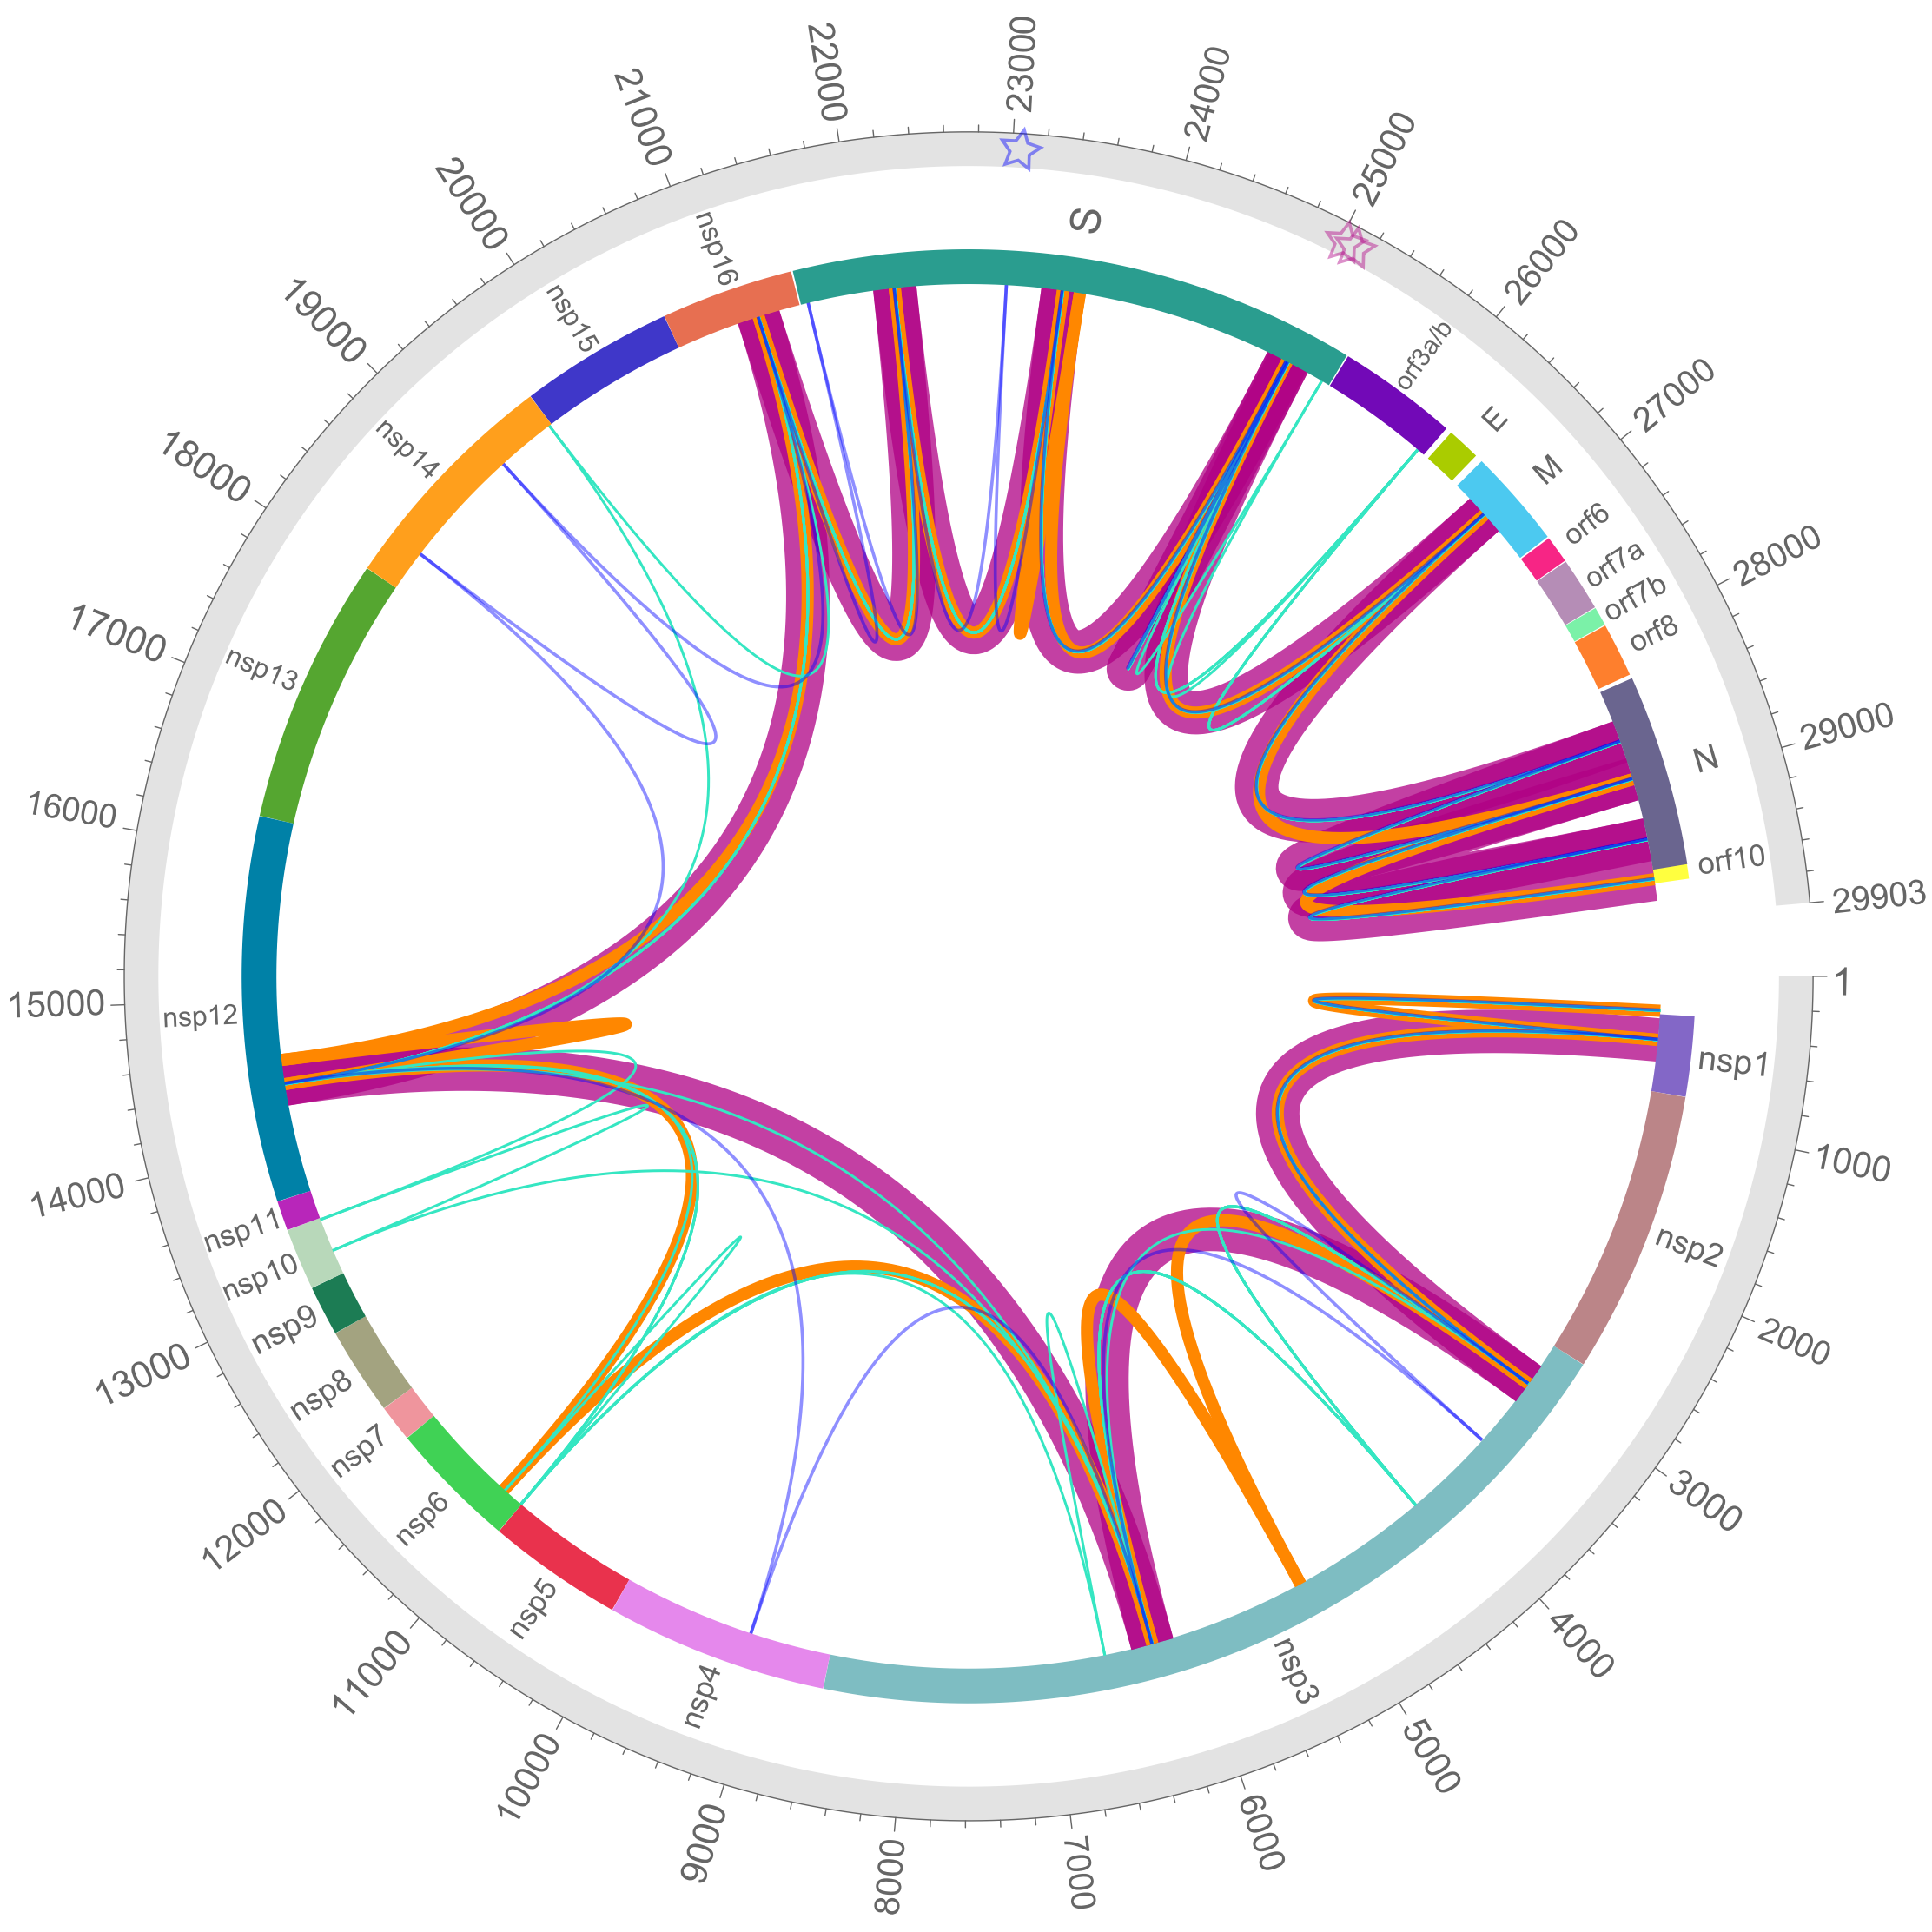

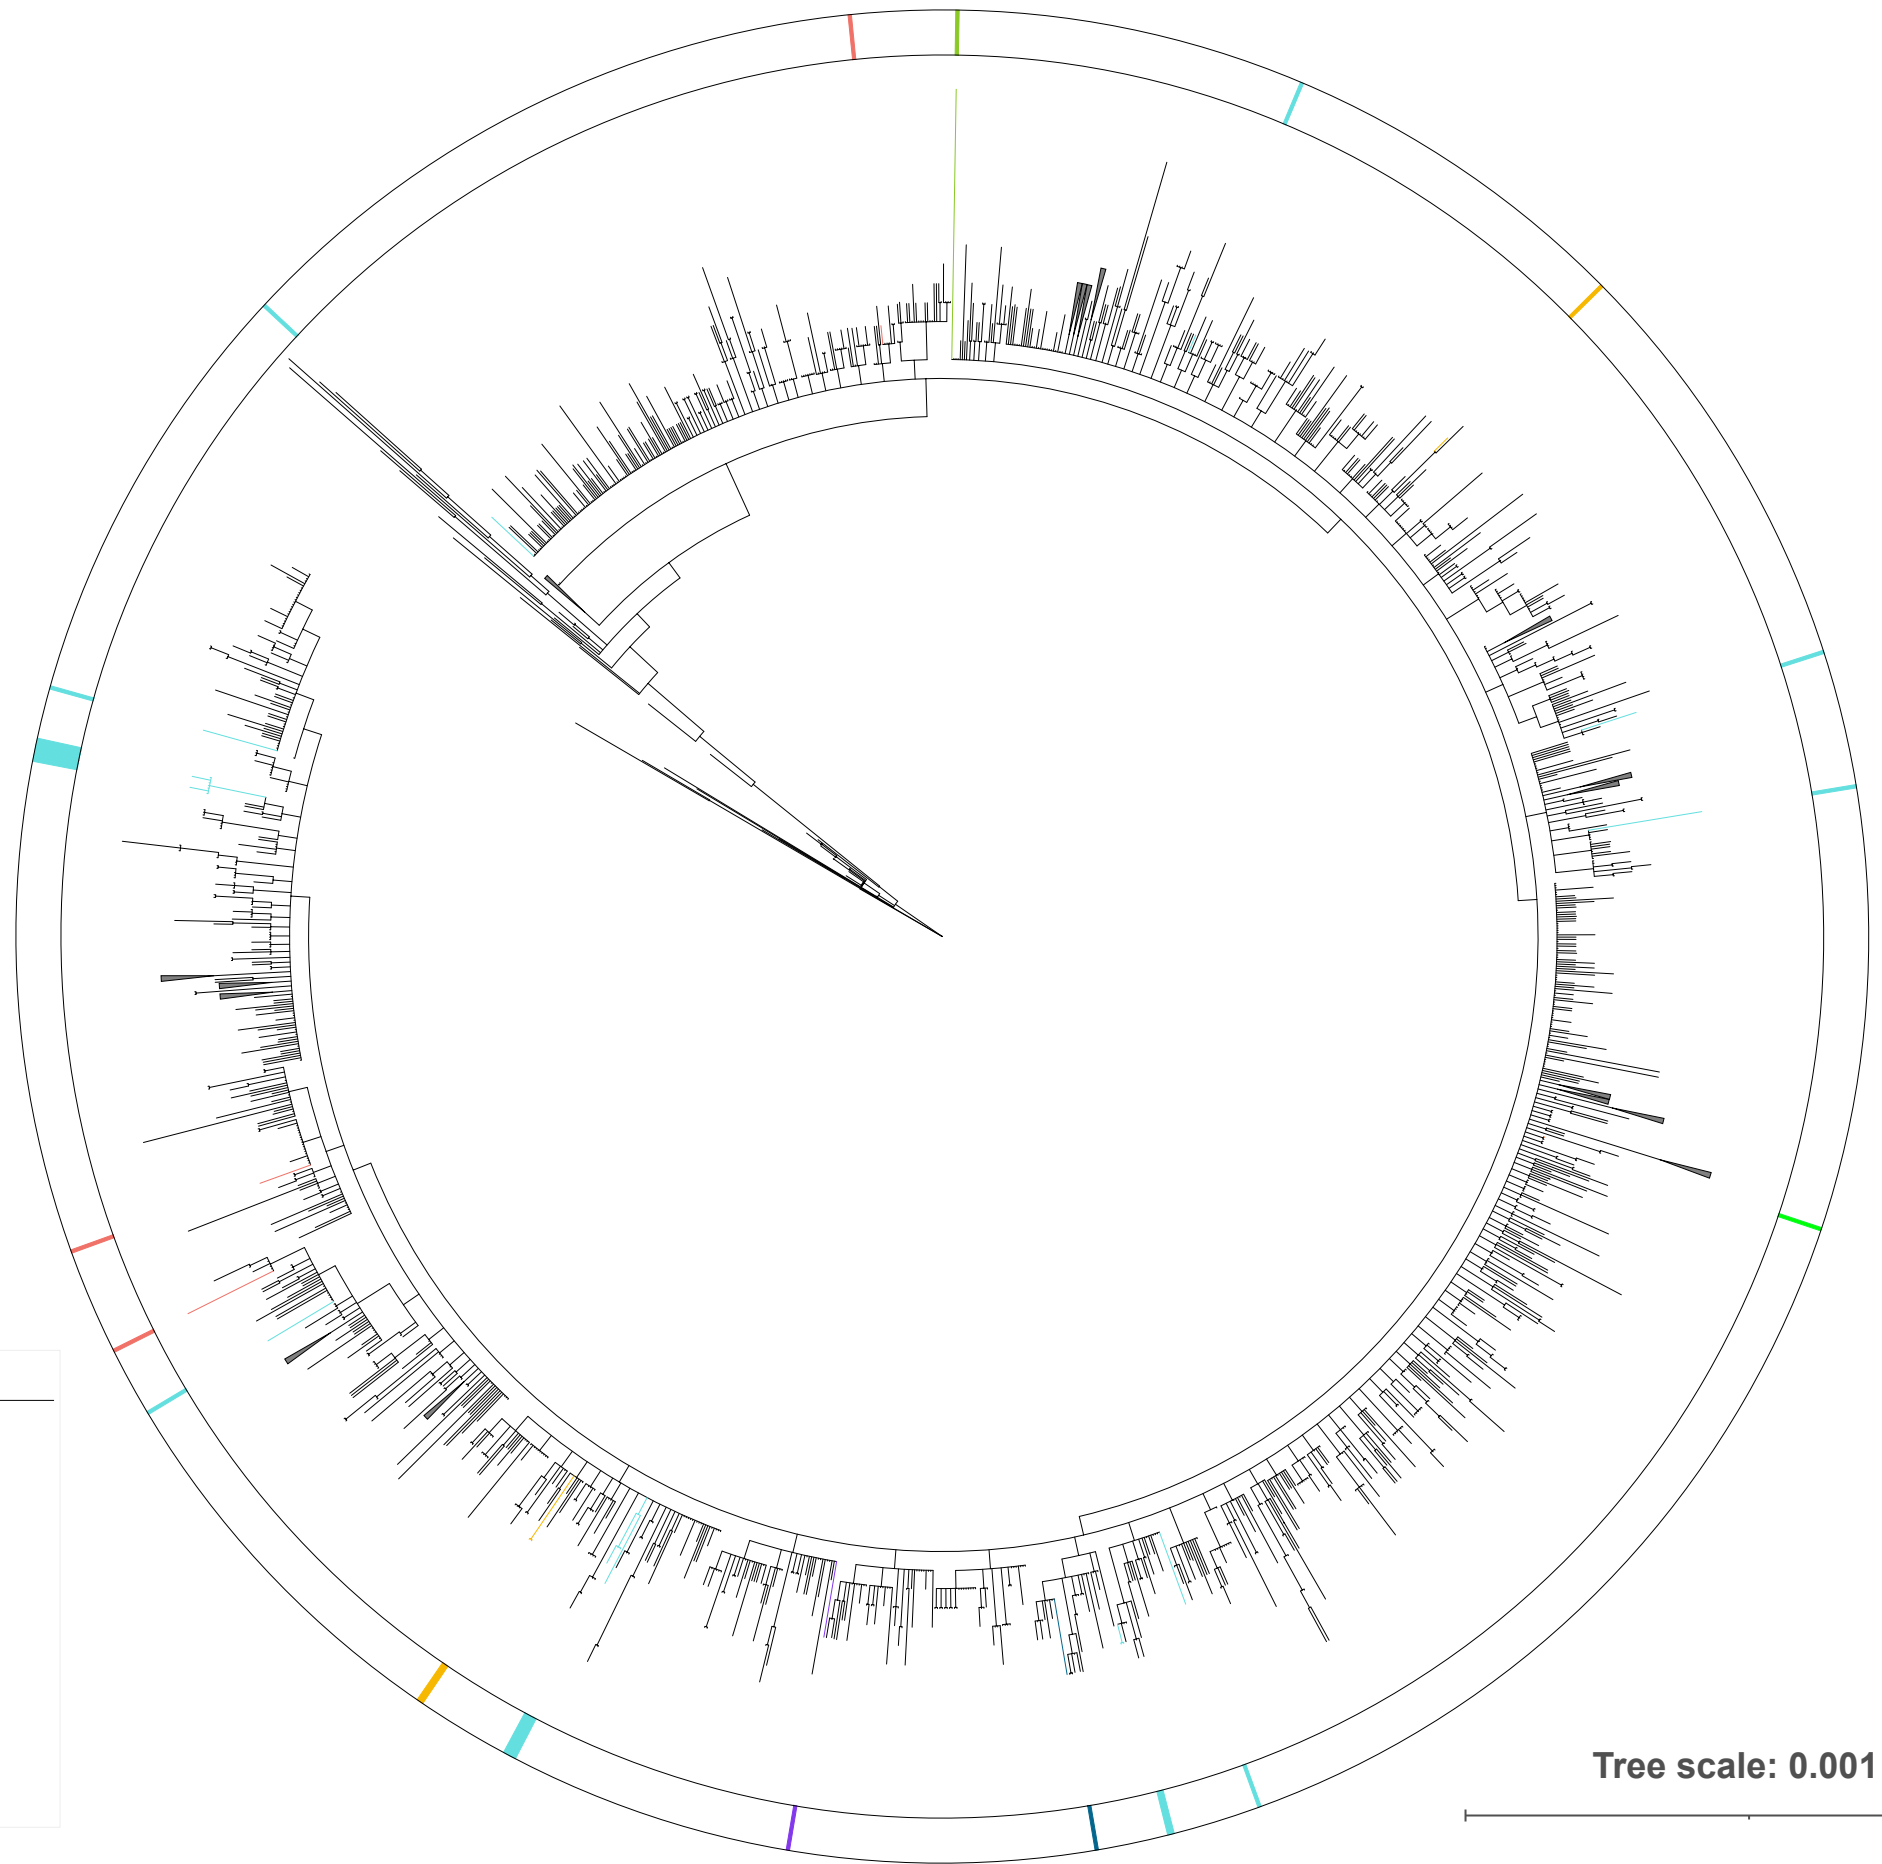

**Sequences involving N501Y**

- D1163A
- D1163N
- D1163V
- D1163Y
- G1167R
- G1167V
- D1163Y and G1167V

Tree scale: 0.001



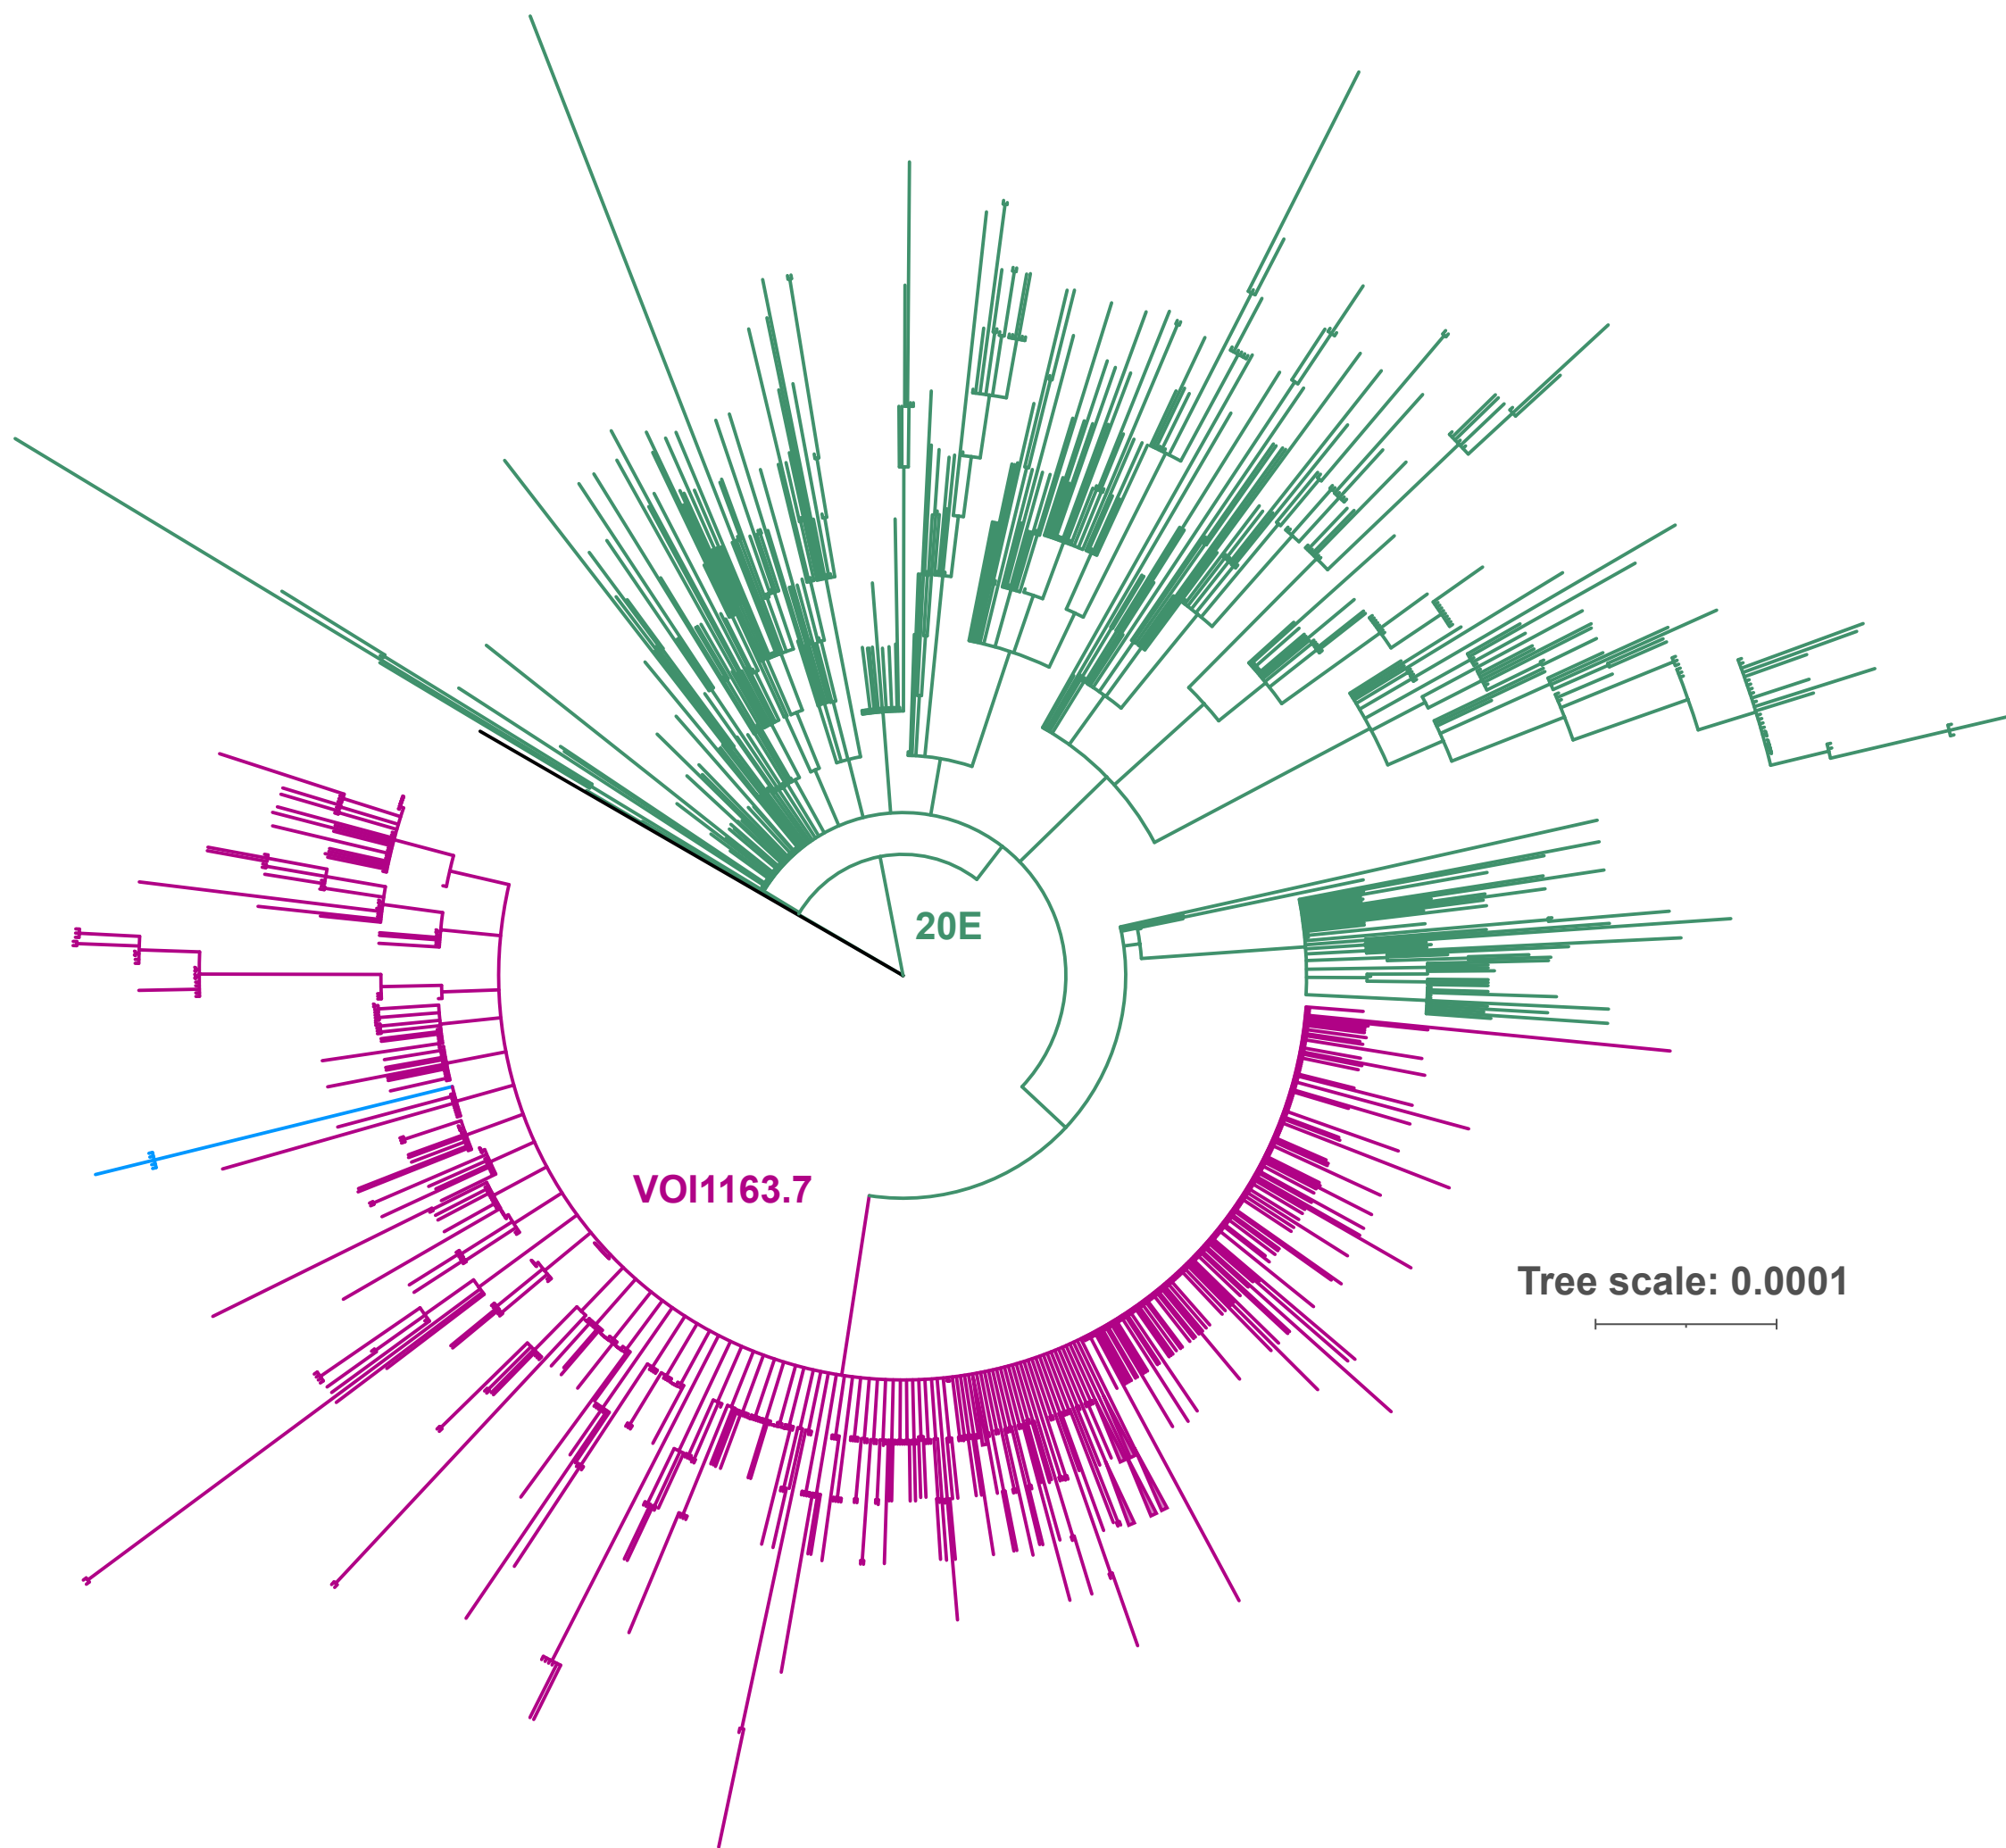

20E

VOI1163.7

Tree scale: 0.0001

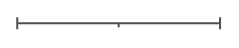

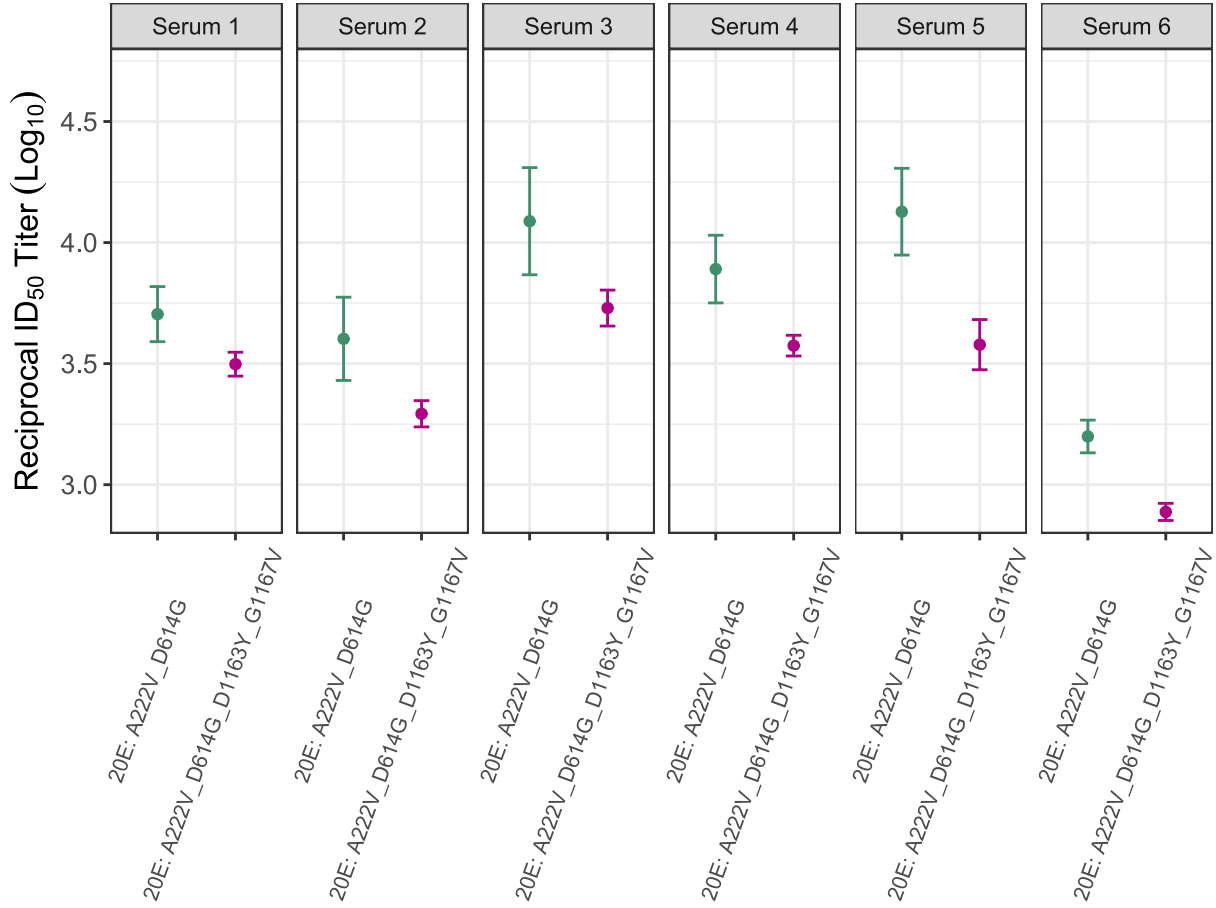

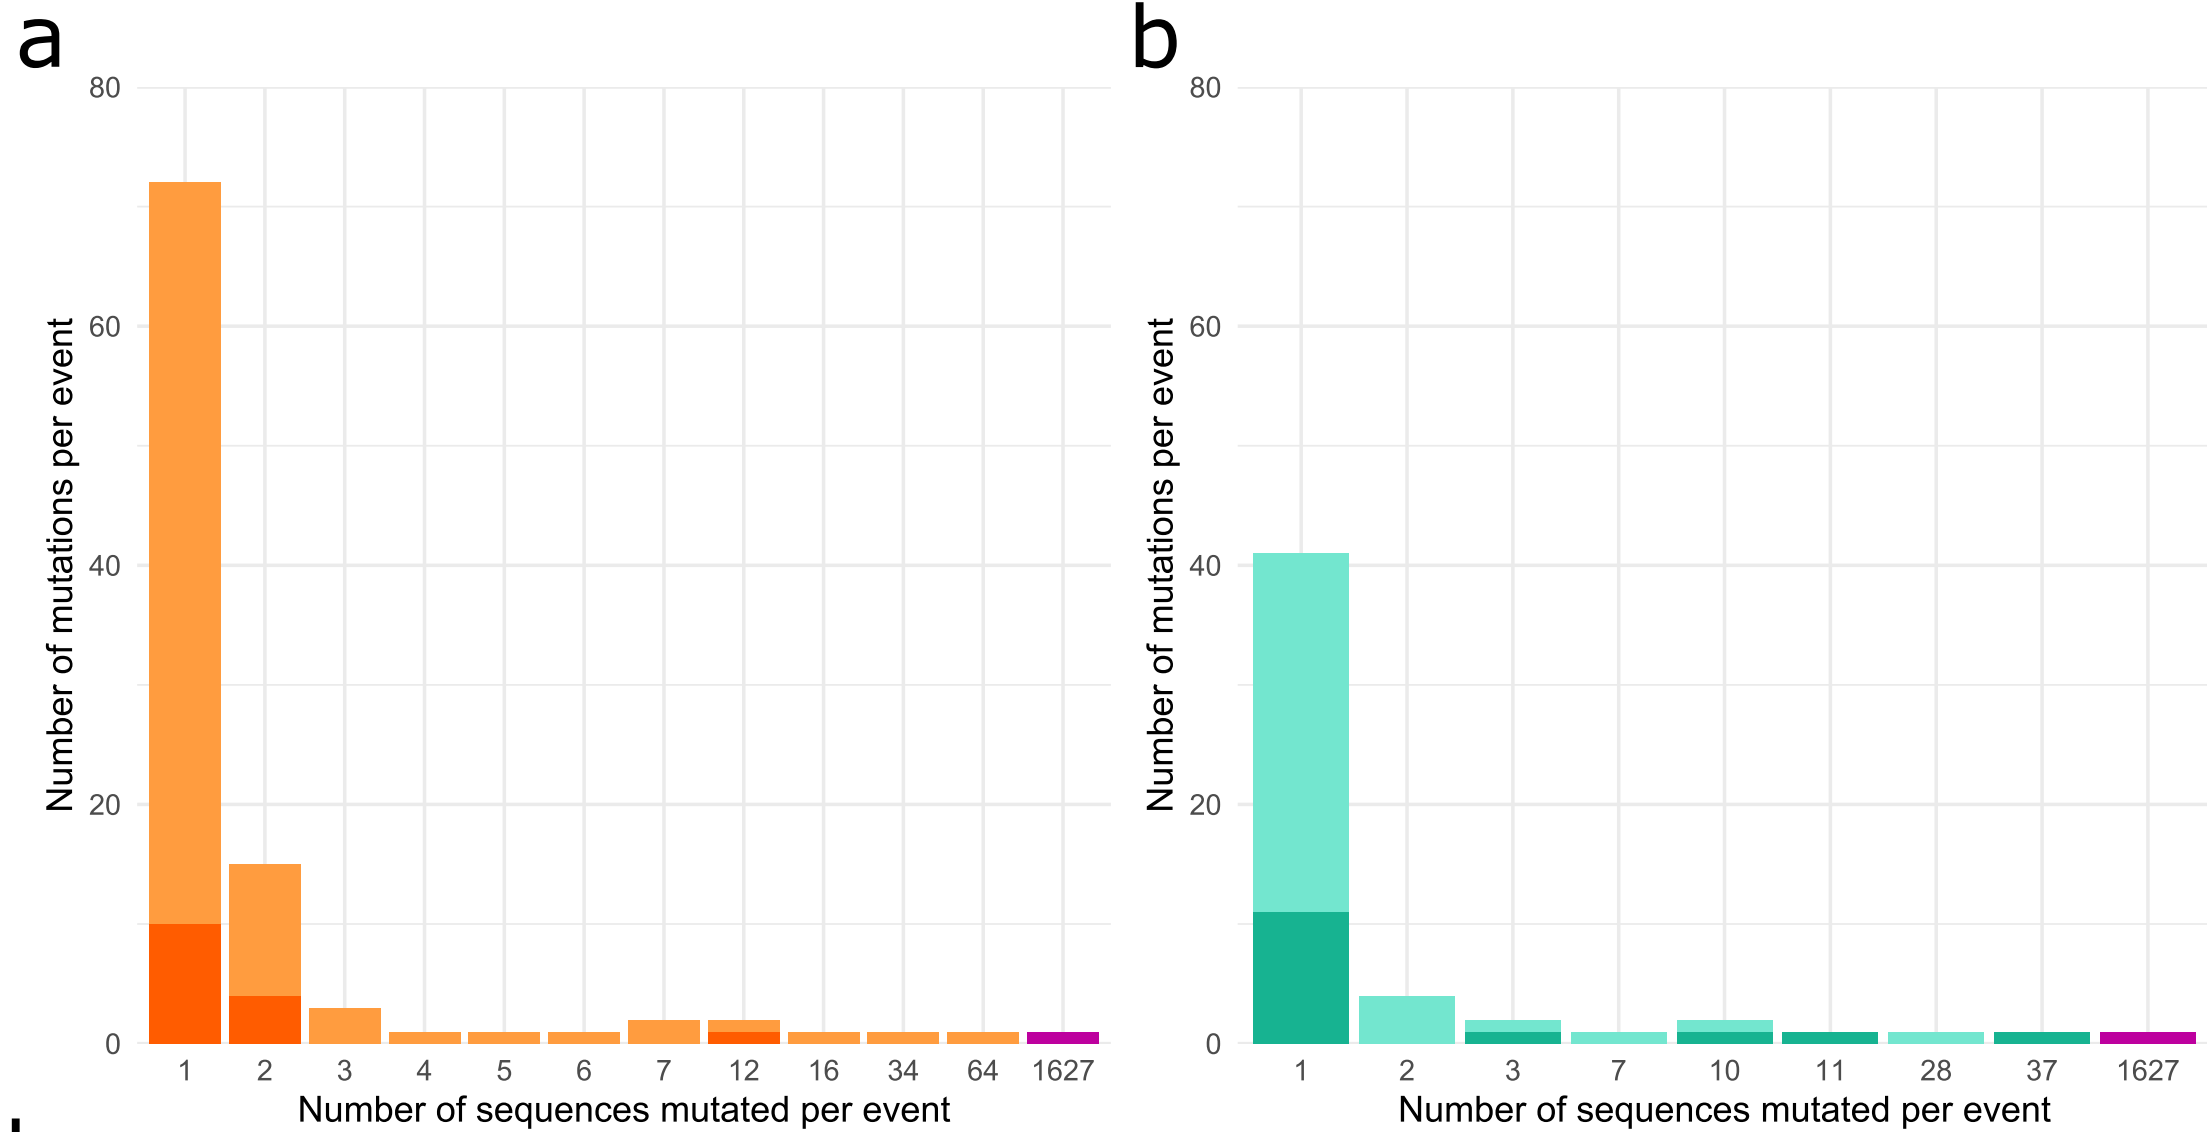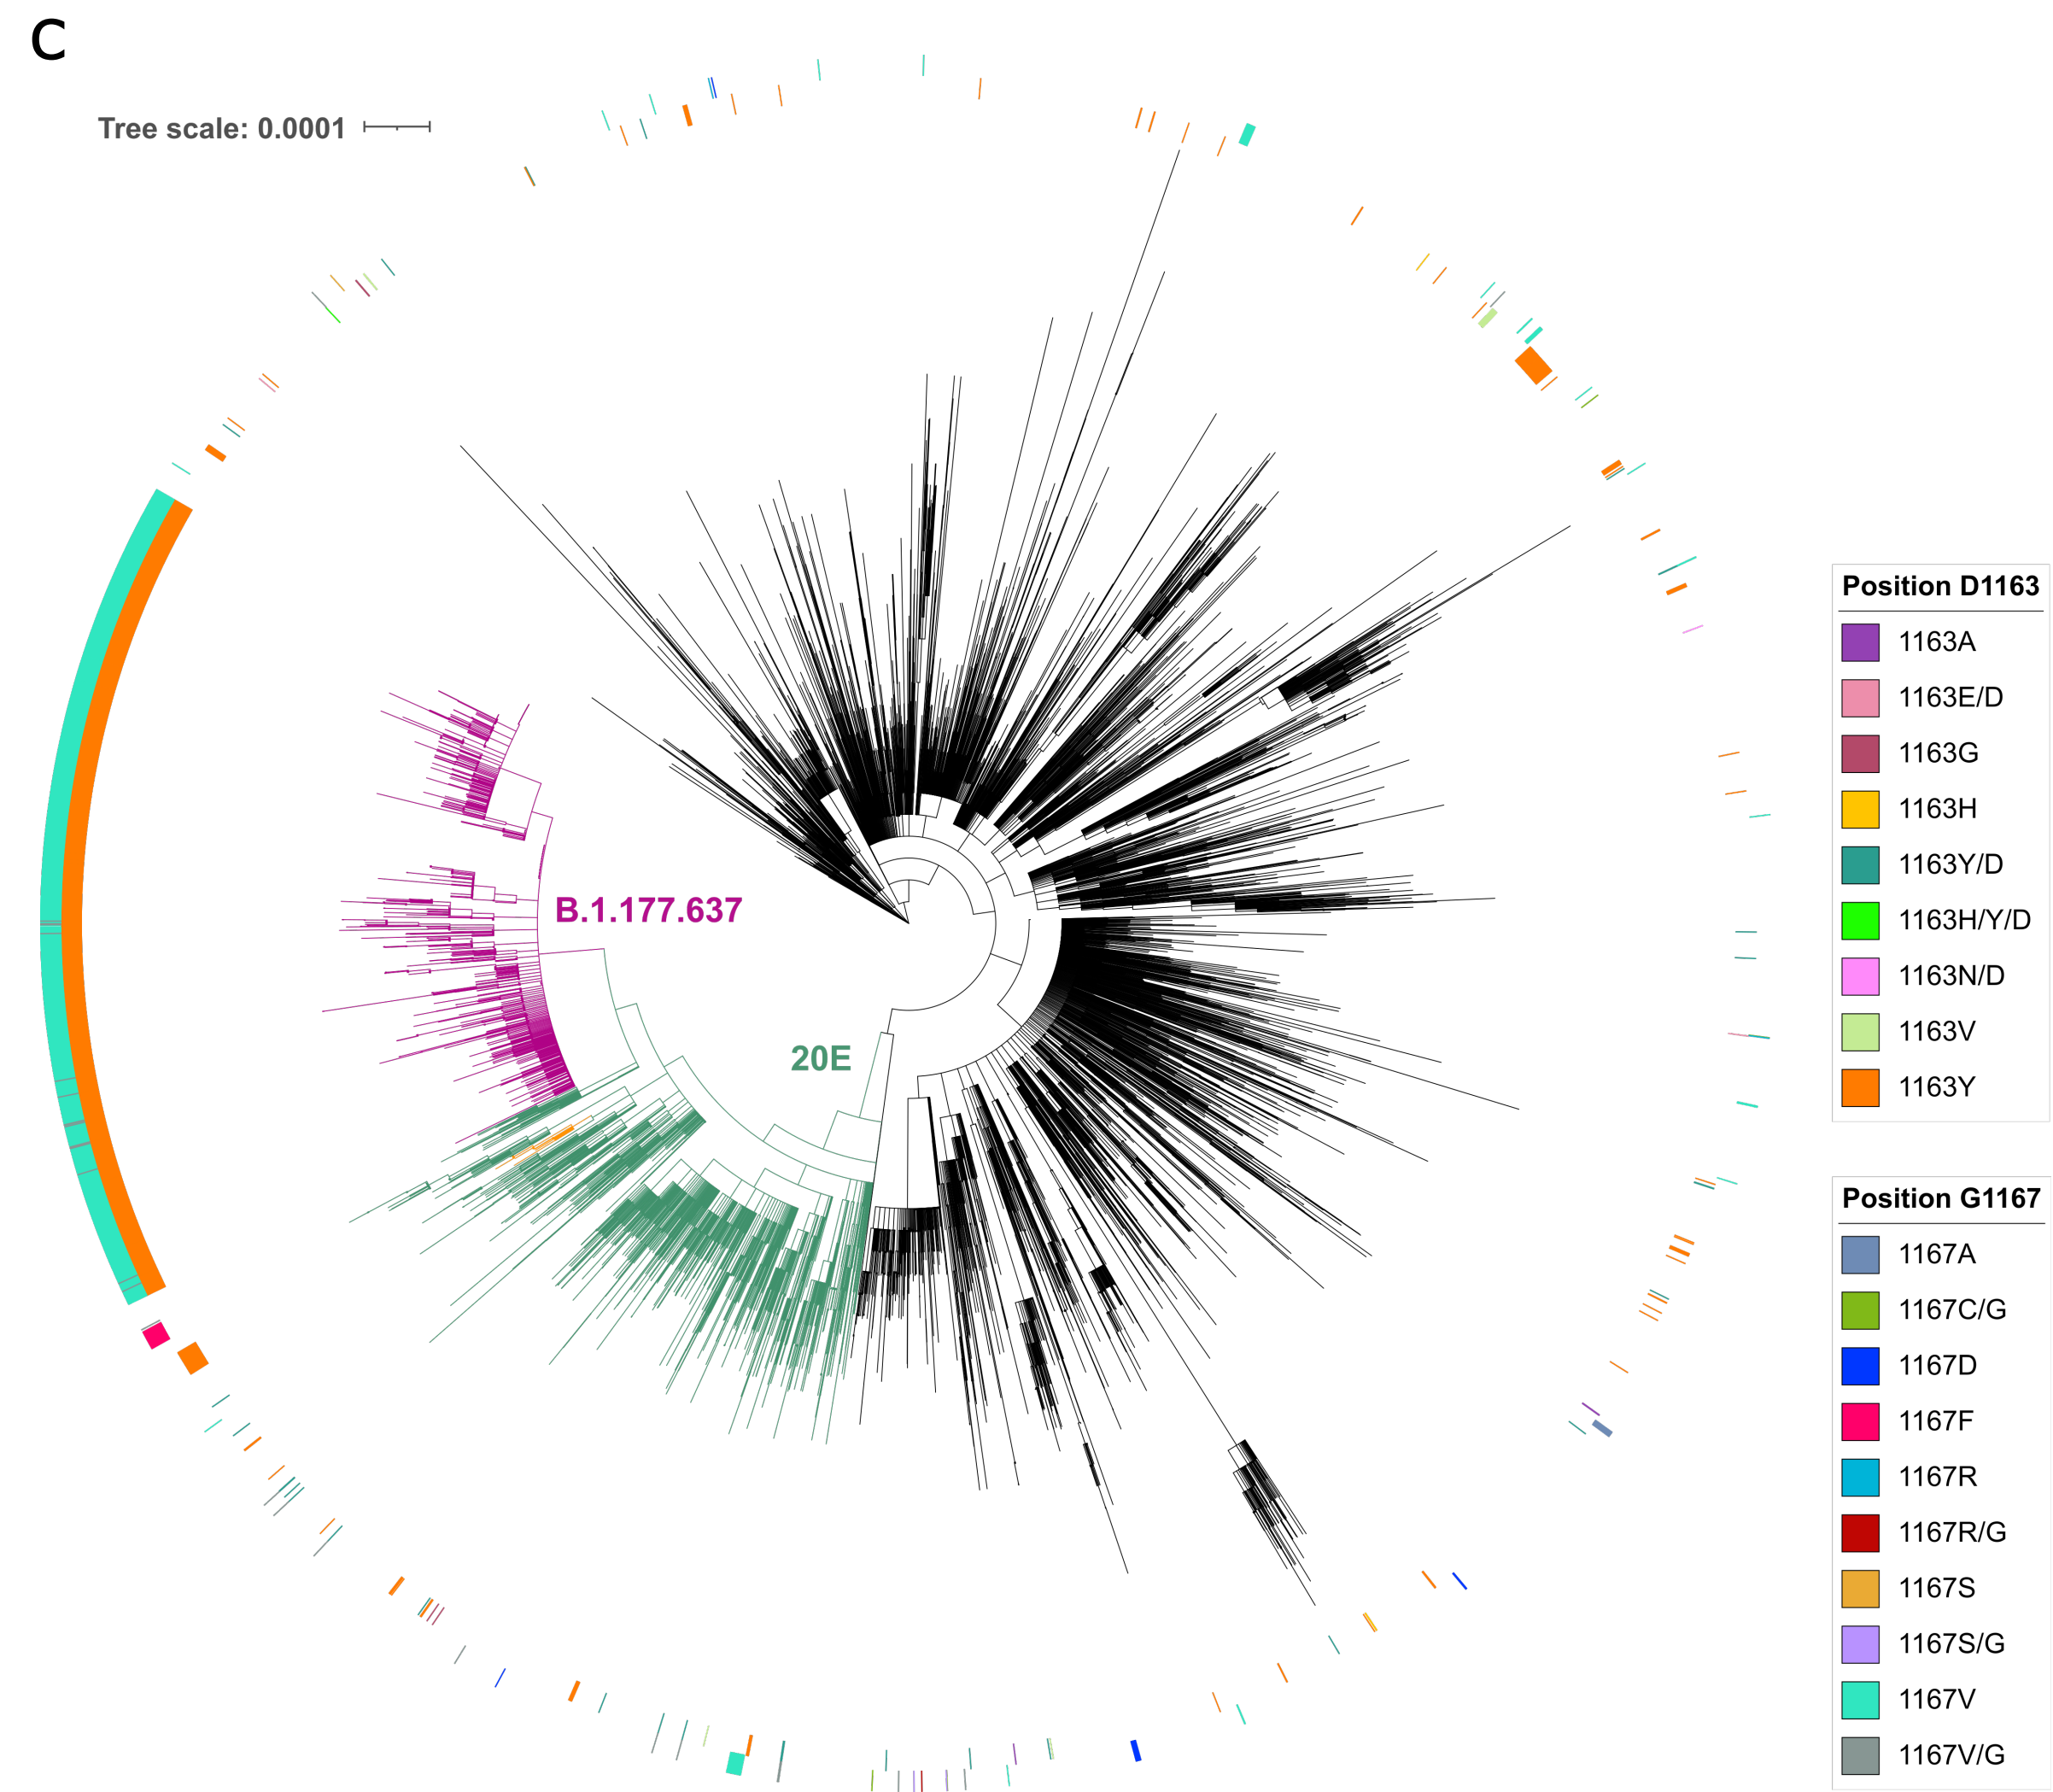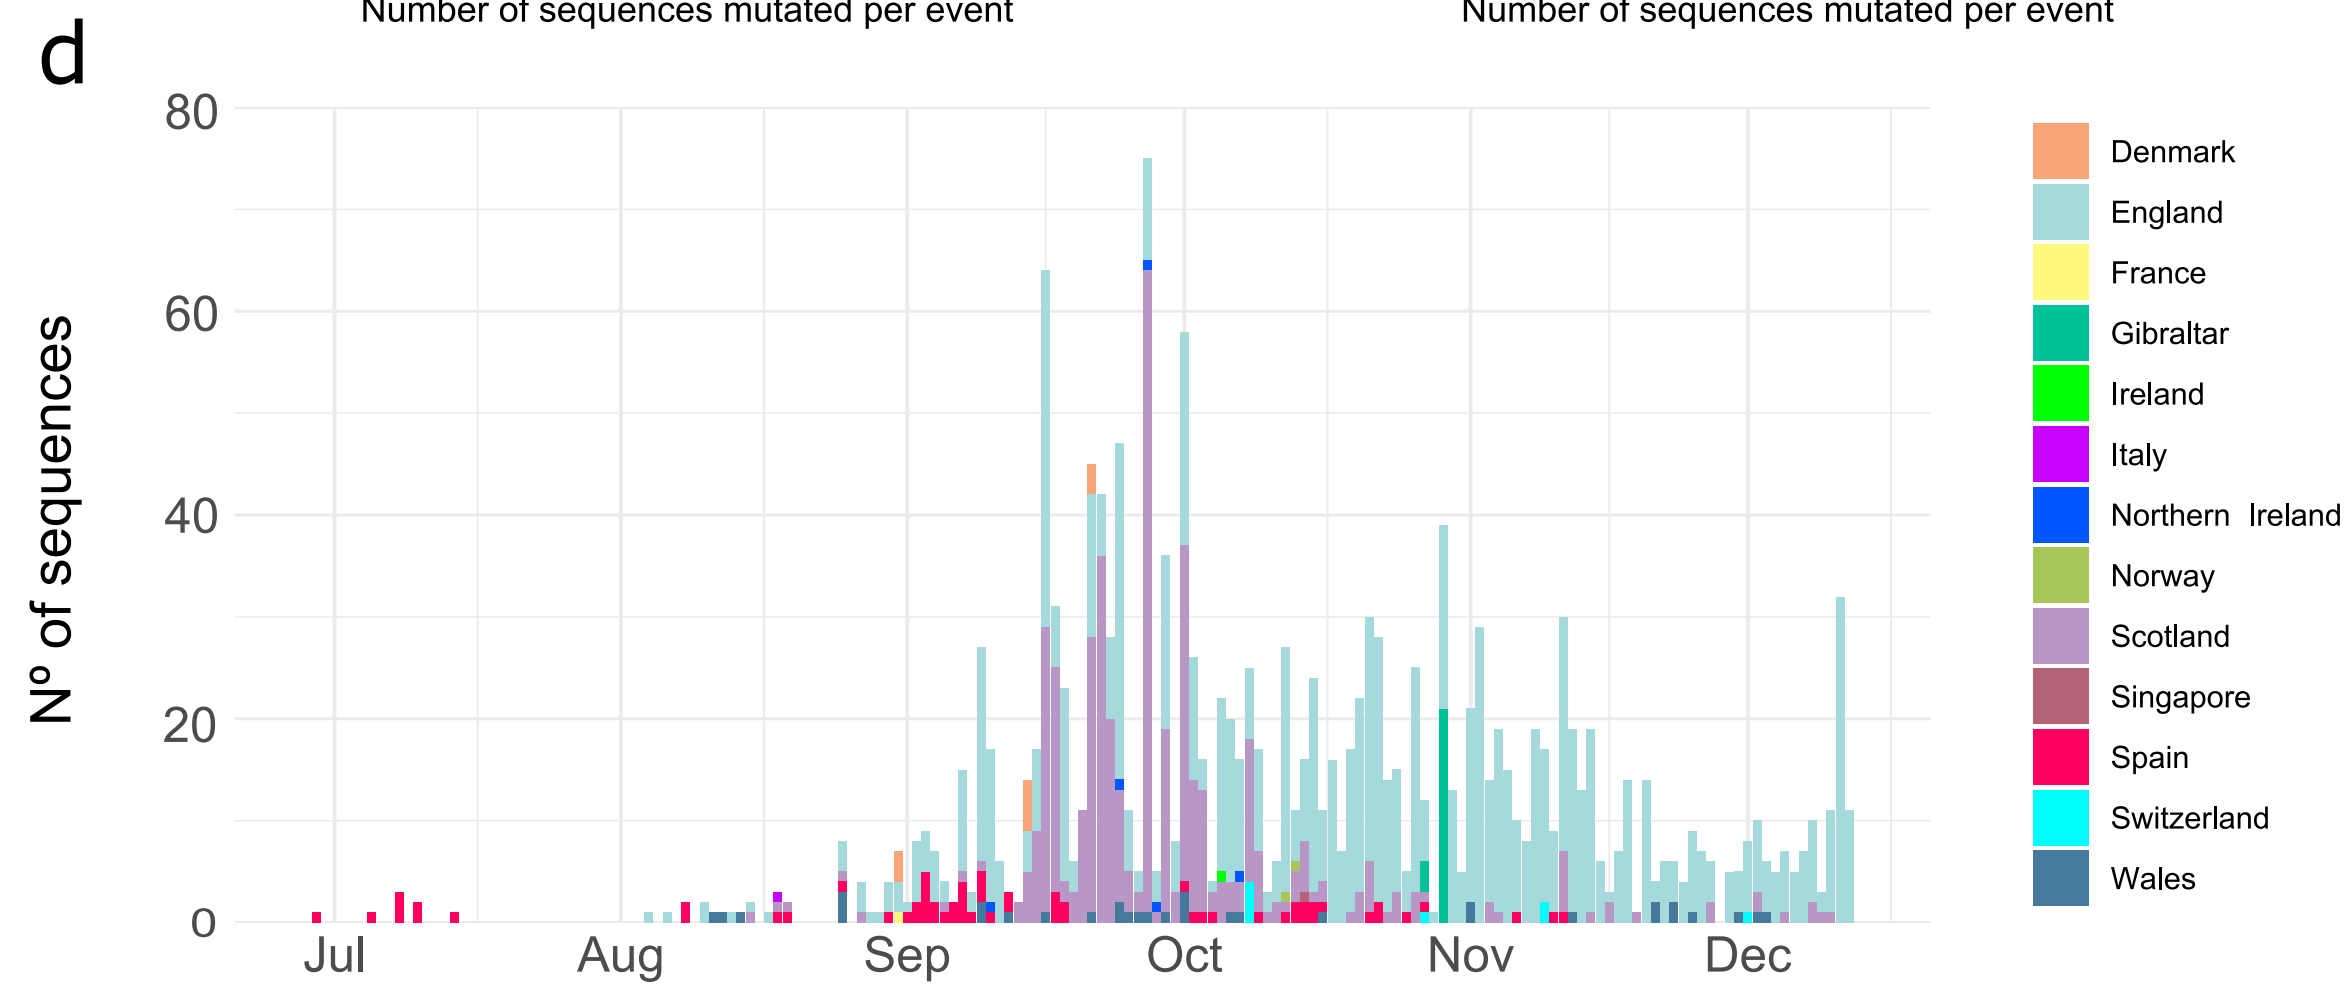



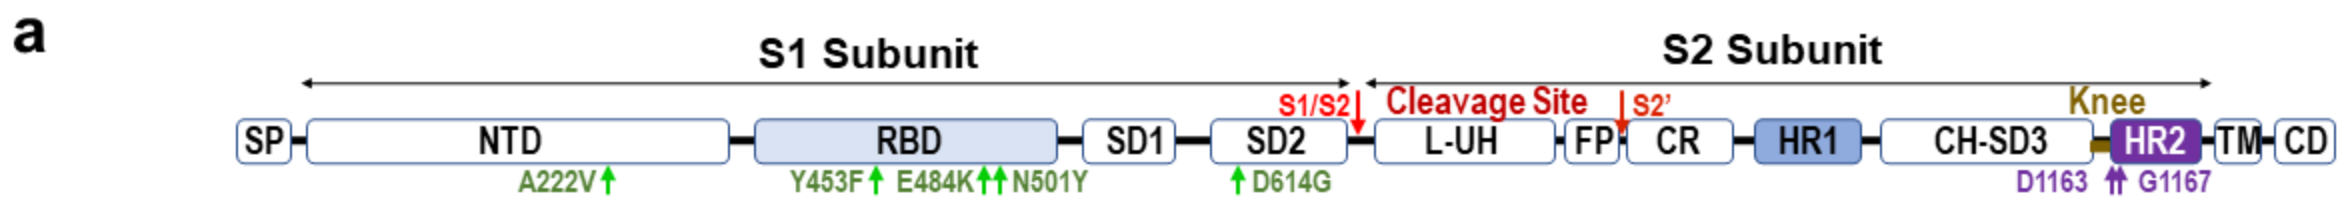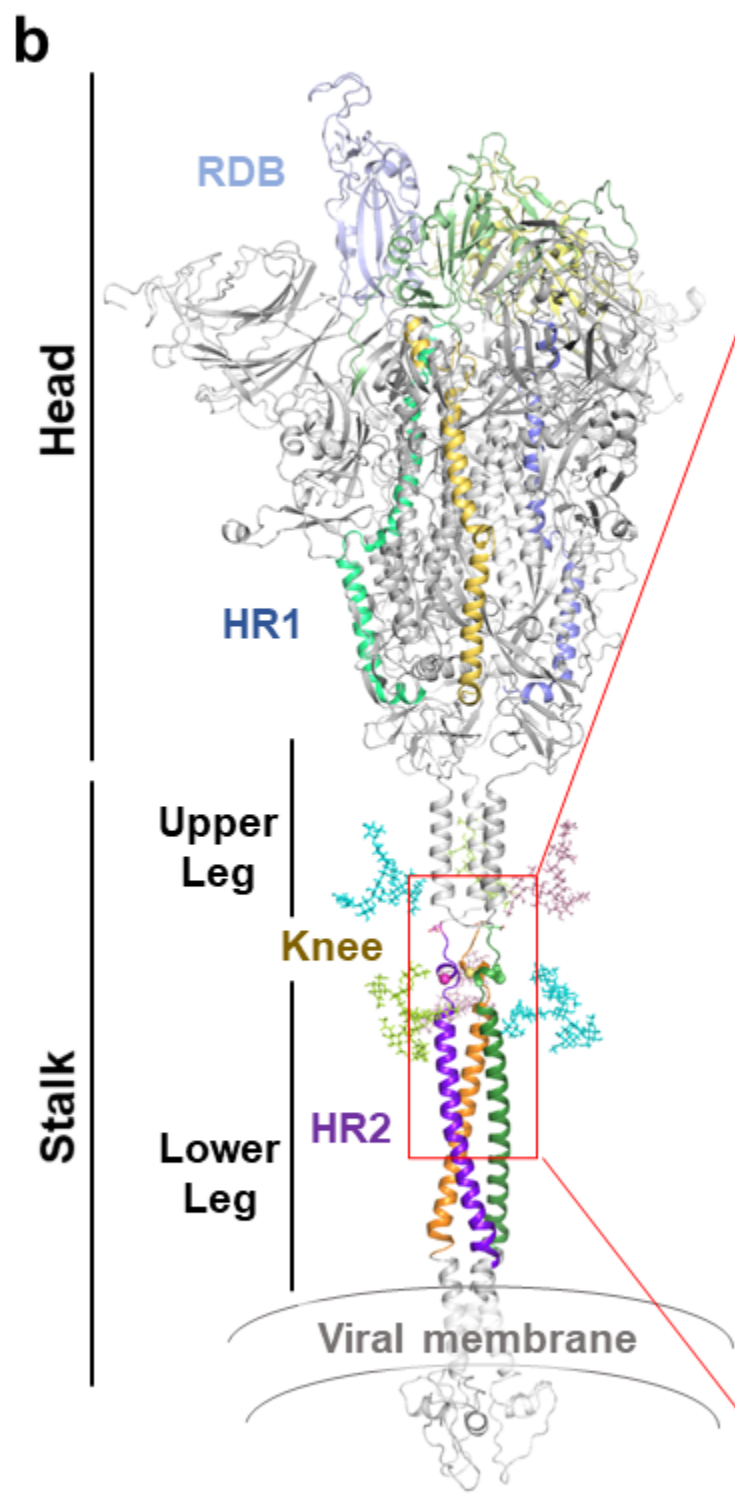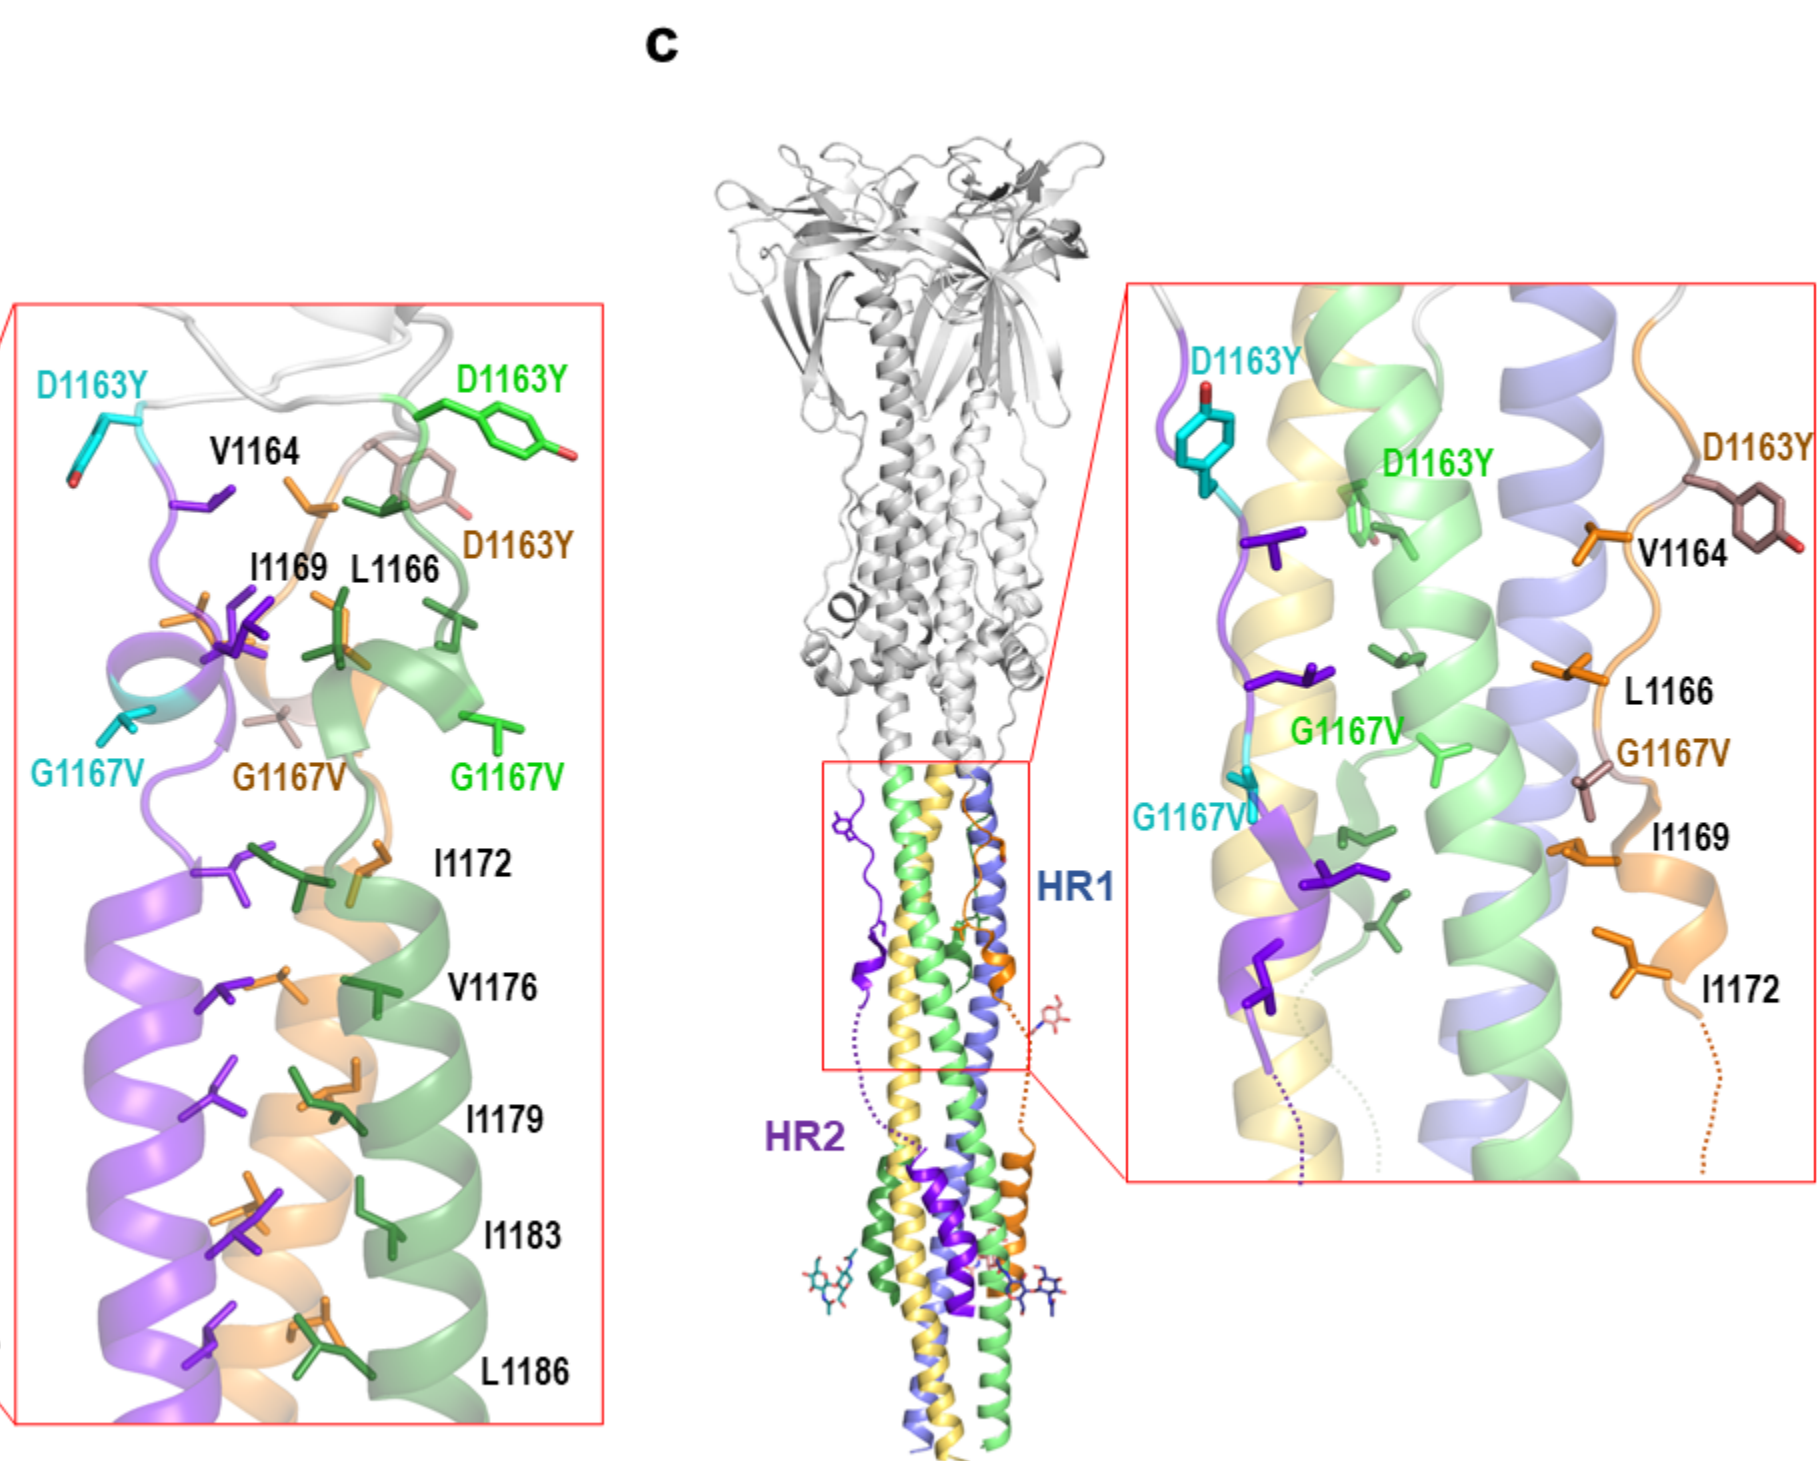

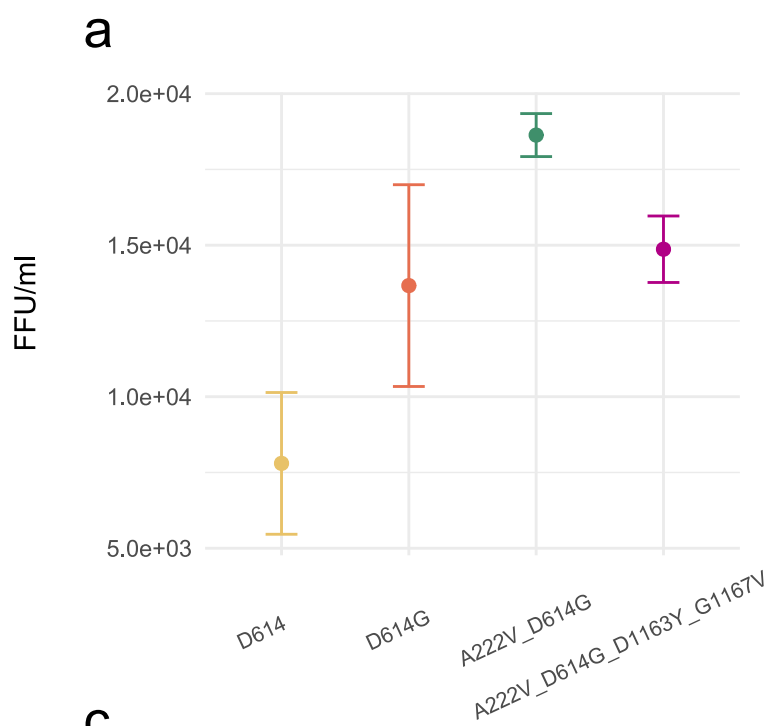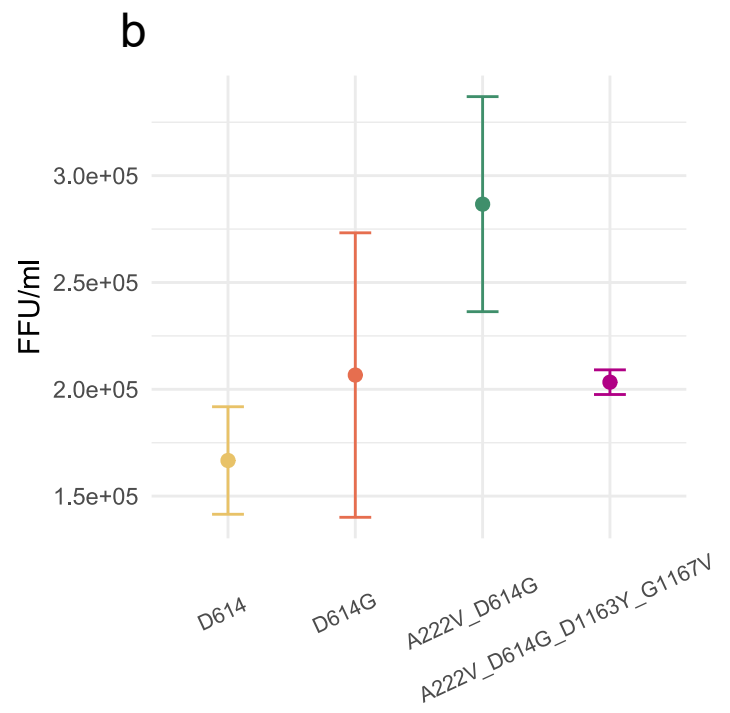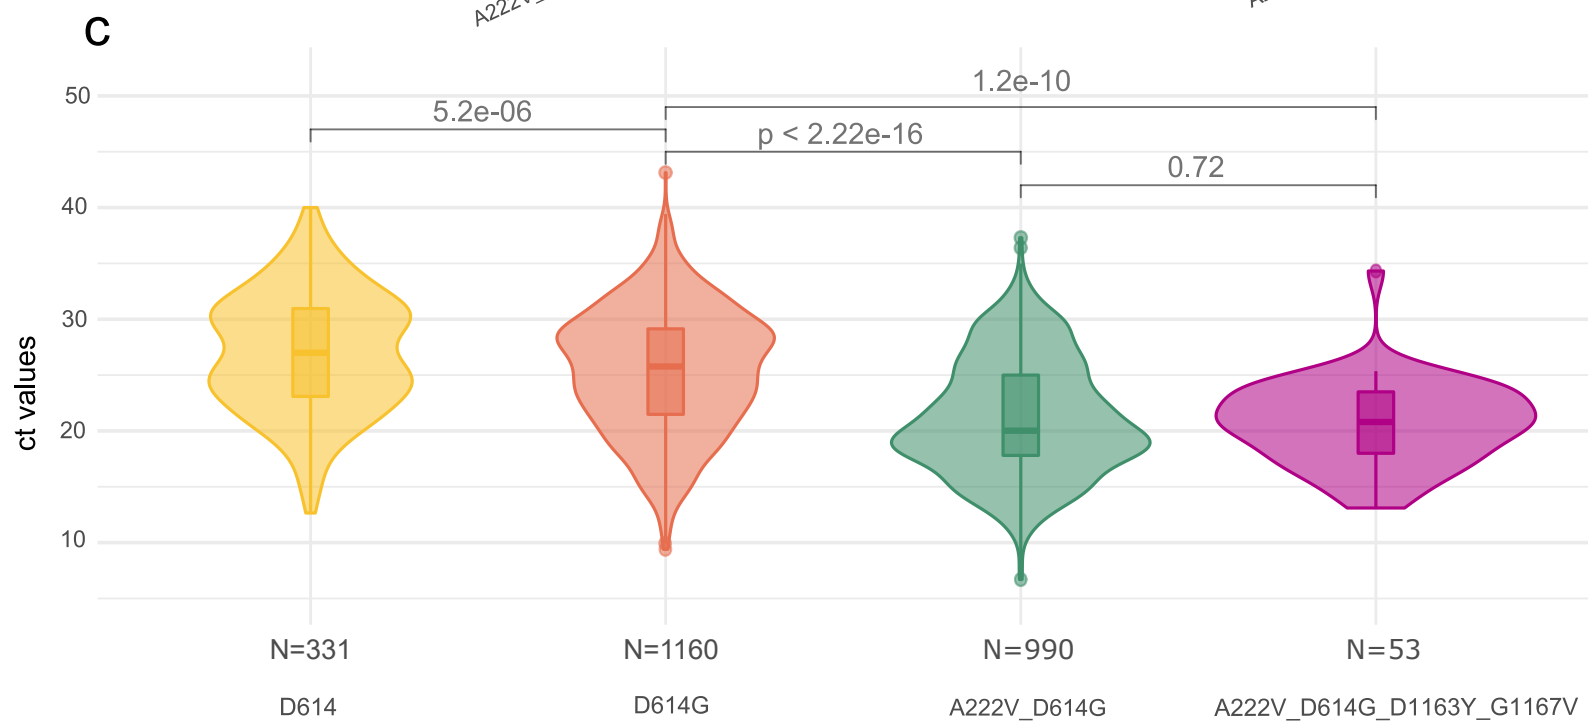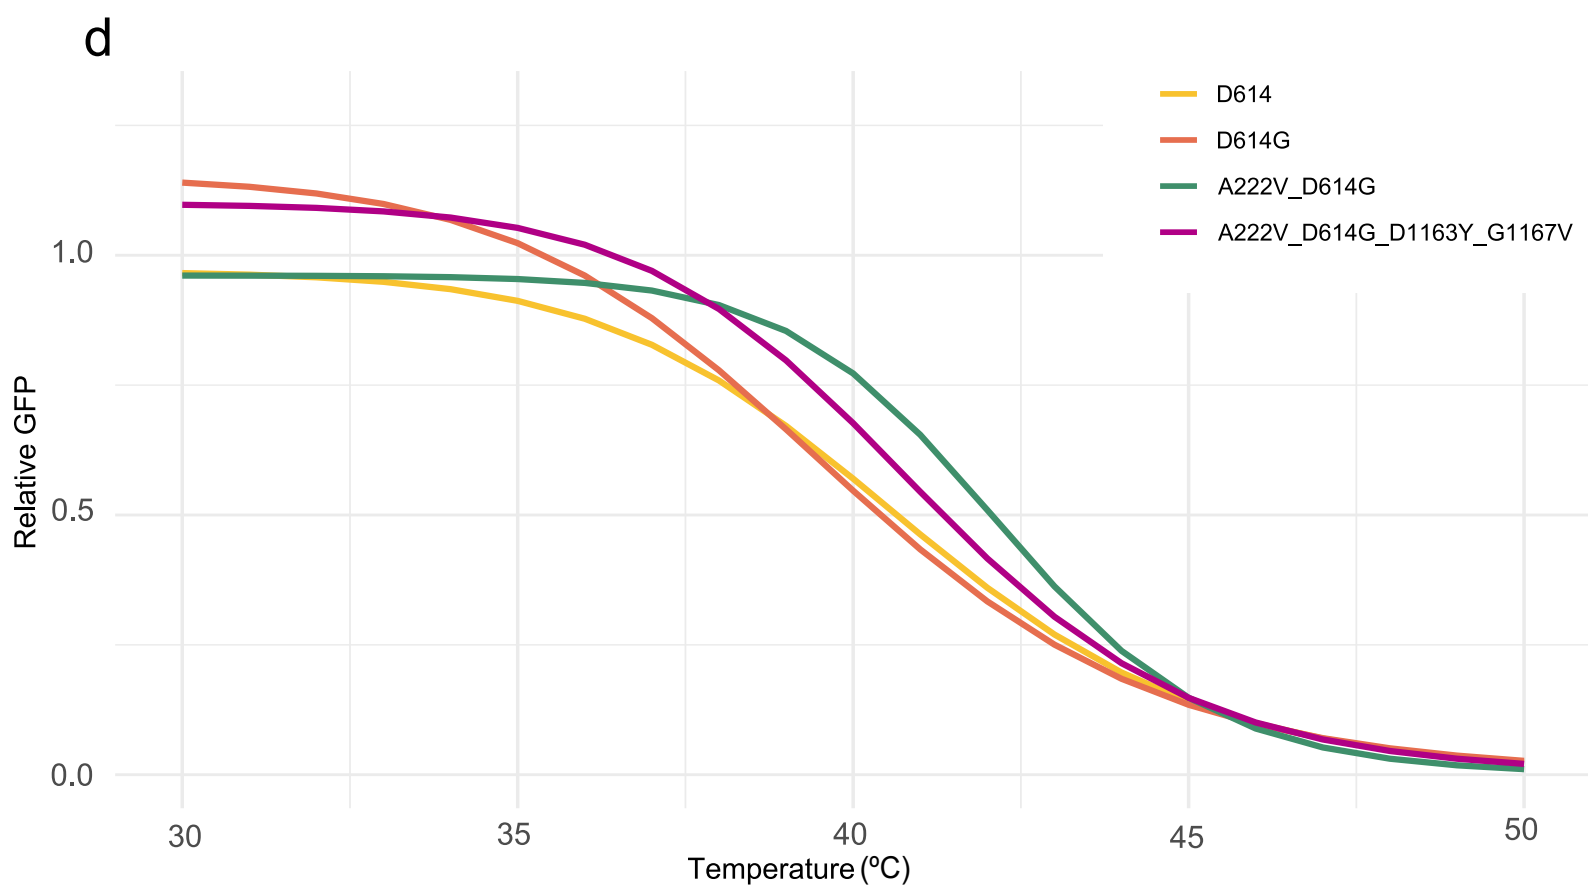

**a**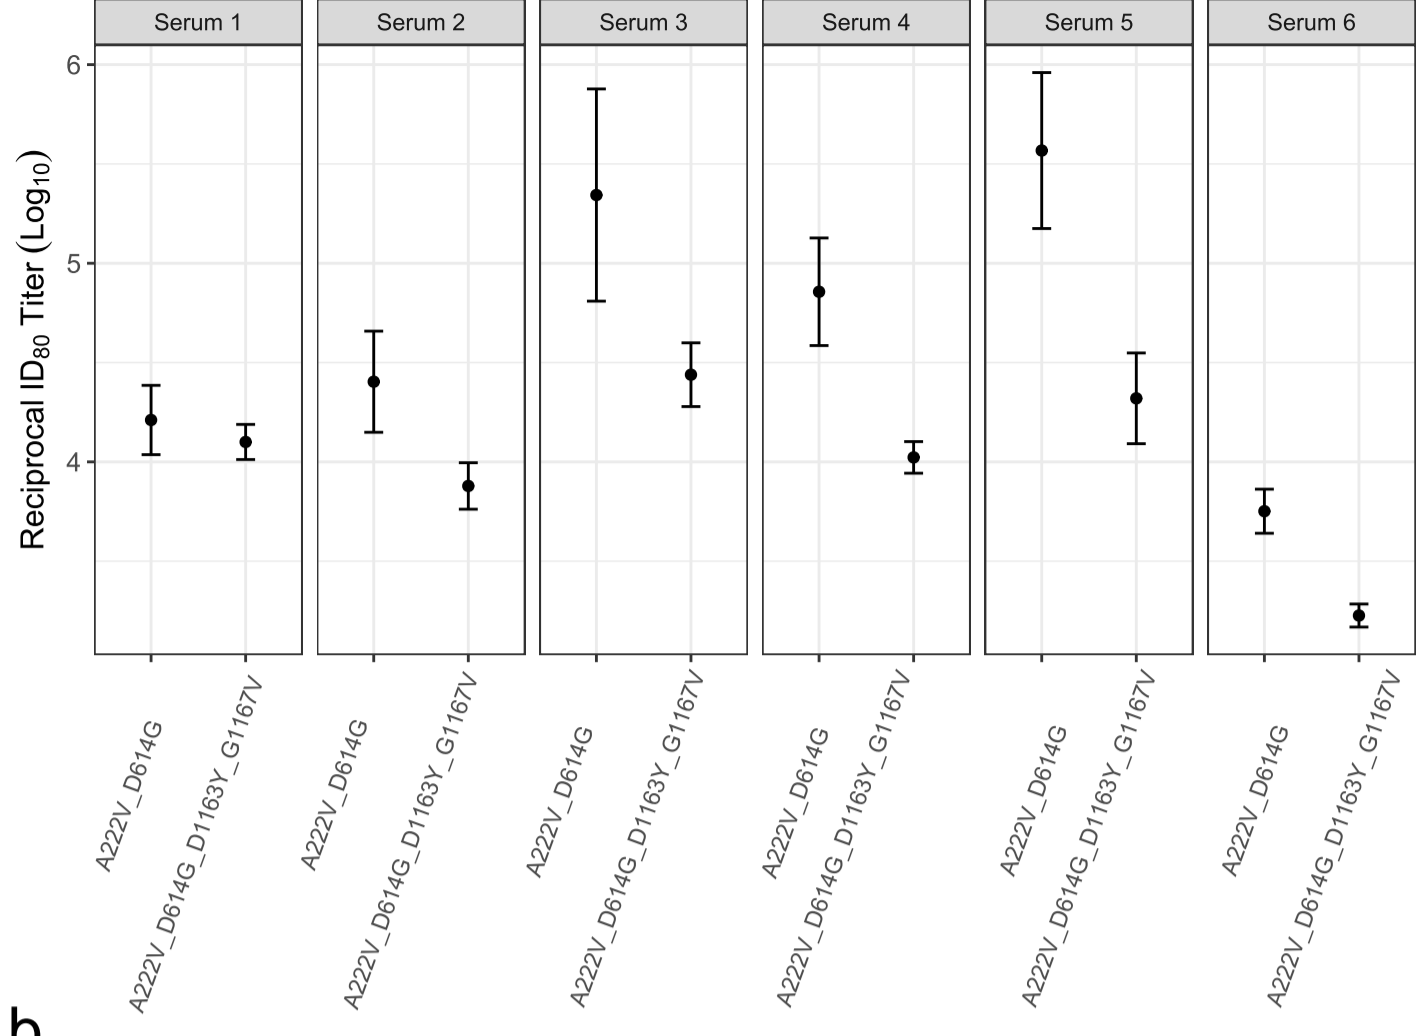**b**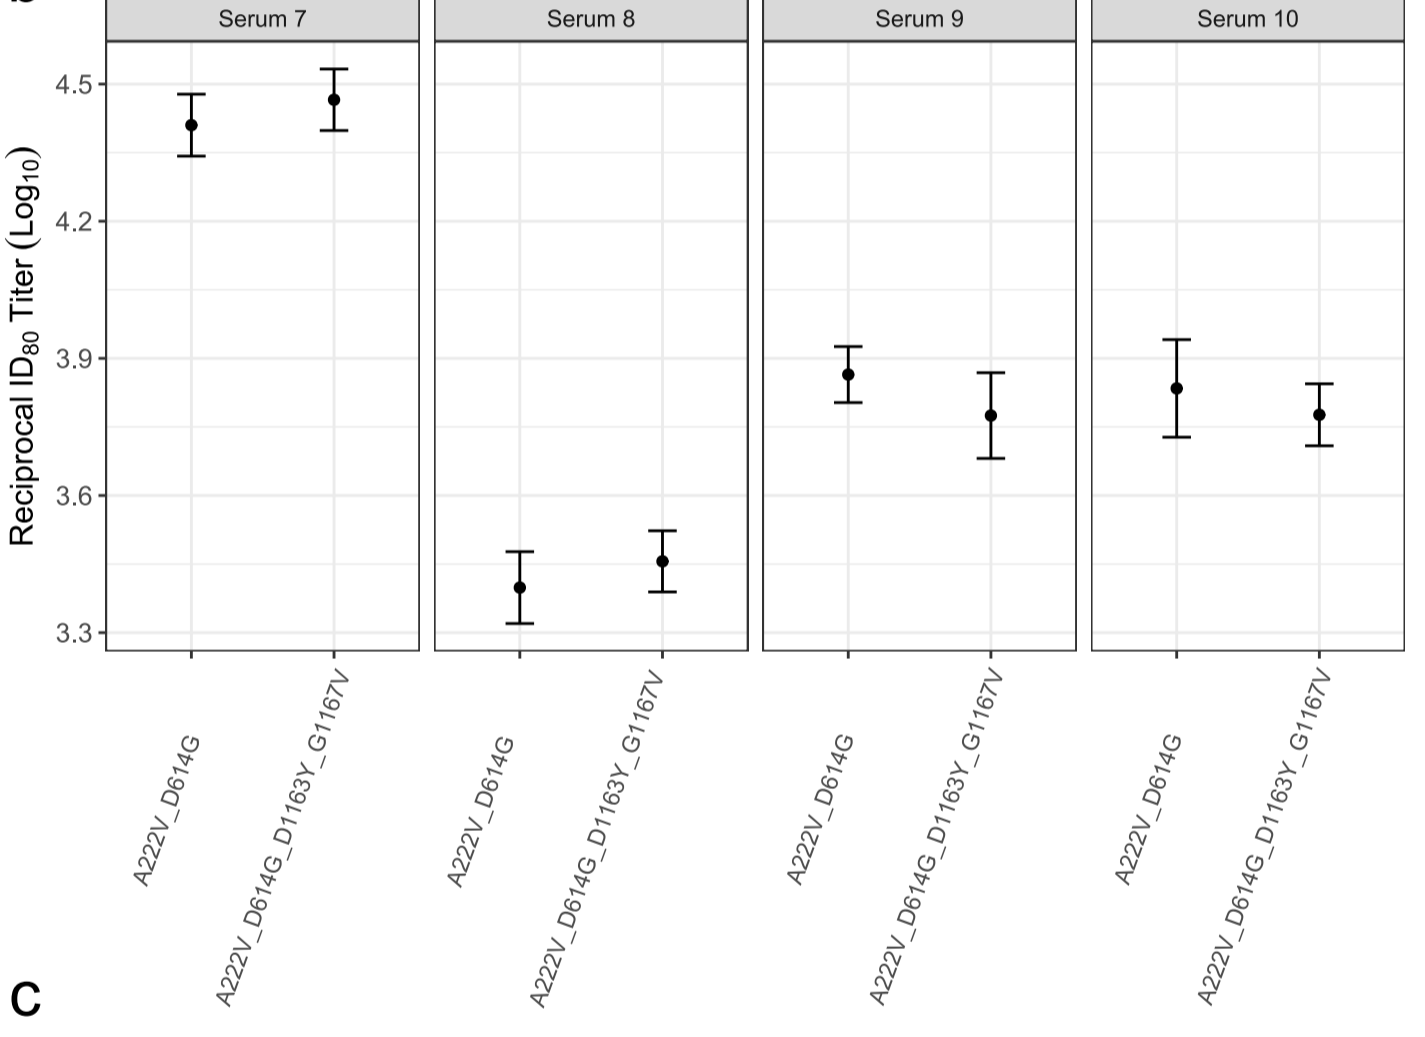**c**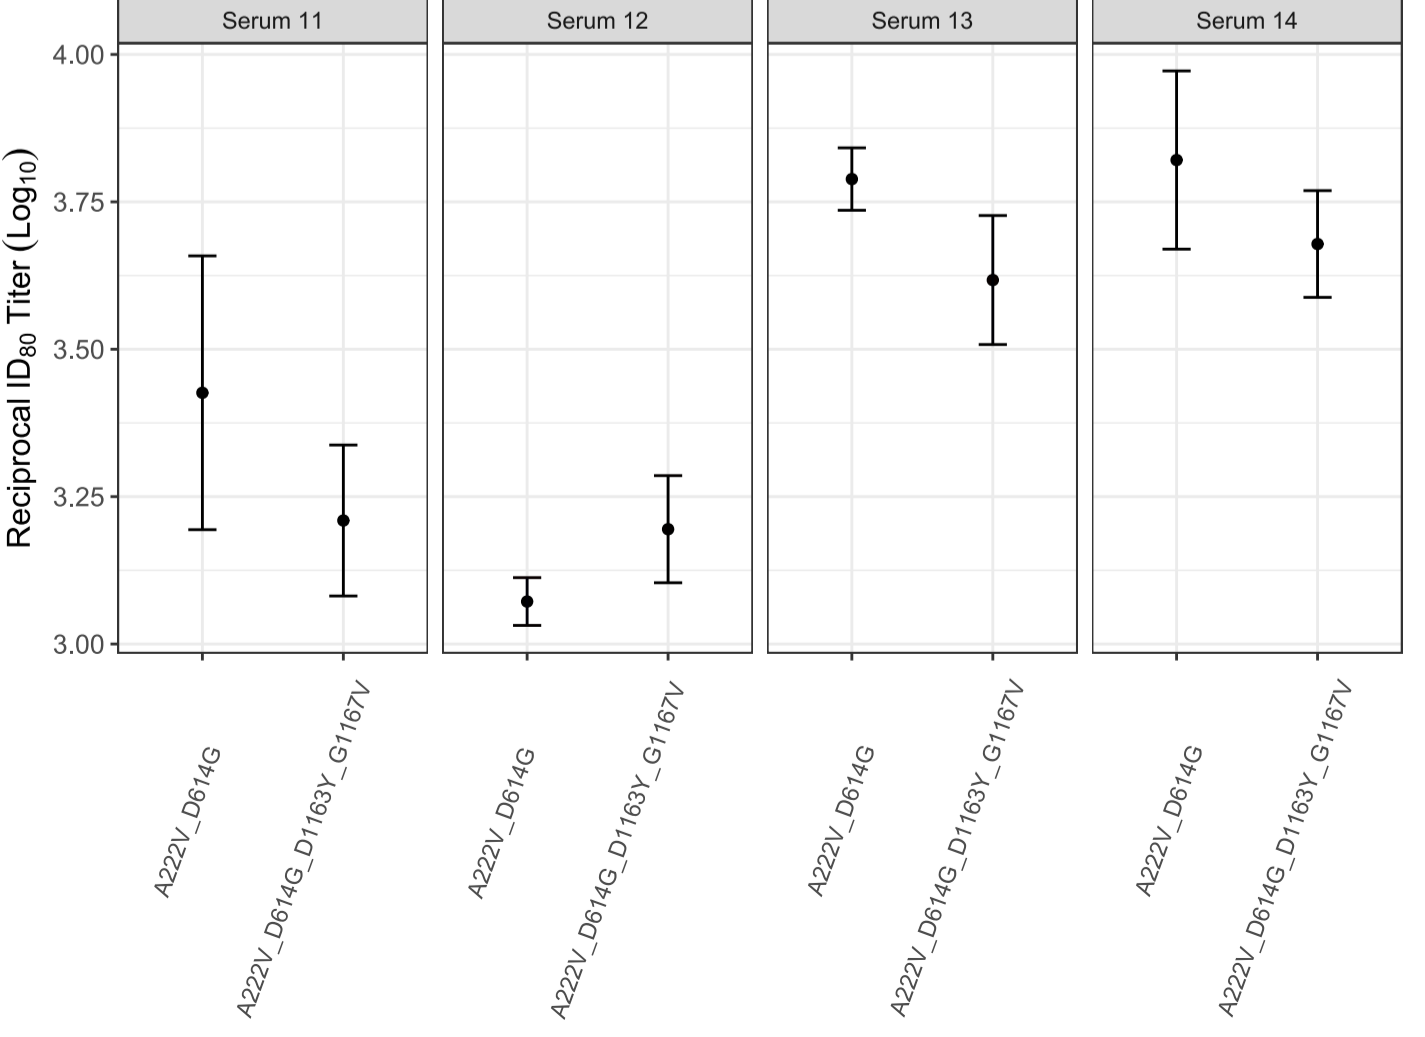

Source: https://medrxiv.org/content/10.1101/2021.03.08.21253075.full.pdf
